# Supplementary material for: Comprehensive analysis of the prognostic implications and functional exploration of PAK gene family in human cancer
Source: Cancer Cell Int. 2022 Sep 5;22:275. doi: 10.1186/s12935-022-02689-6 (PMC9442929; doi:10.1186/s12935-022-02689-6)
Supplement: Supplementary file 25 — Additional file 25: Table S1. The coefficient of each PAK gene family member. [file 12935_2022_2689_MOESM25_ESM.xlsx]

## Sheet: Sheet1
Gene	Coef
PAK1	0.571365
PAK2	0.725822
PAK3	0.359673
PAK4	0.724311
PAK6	-0.383081
PAK7	-0.904049
