# Supplementary material for: Comprehensive analysis of the prognostic implications and functional exploration of PAK gene family in human cancer
Source: Cancer Cell Int. 2022 Sep 5;22:275. doi: 10.1186/s12935-022-02689-6 (PMC9442929; doi:10.1186/s12935-022-02689-6)
Supplement: Supplementary file 26 — Additional file 26: Table S2. LGG patient-related information in the four validation datasets. [file 12935_2022_2689_MOESM26_ESM.xlsx]

## Sheet: Sheet1
Variable		TCGA set (n=476)		CGGA1 set (n=270)		CGGA2 set (n=137)		GSE16011 set (n=102)		Rembrandt set (n=129)
Age	>=mid	245	0.514706	143	0.52963	72	0.525547	58	0.568627	67	0.51938
	<mid	231	0.485294	127	0.47037	65	0.474453	54	0.529412	62	0.48062
Gender	Male	260	0.546218	150	0.555556	85	0.620438	67	0.656863	77	0.596899
	Female	216	0.453782	120	0.444444	52	0.379562	35	0.343137	52	0.403101
Grade	WHO II	231	0.485294	130	0.481481	90	0.656934	22	0.215686	64	0.496124
	WHO III	245	0.514706	140	0.518519	47	0.343066	80	0.784314	65	0.503876
IDH1	Wildtype	85	0.178571	176	0.651852	35	0.255474	37	0.362745	N/A	N/A
	Mutant	388	0.815126	64	0.237037	101	0.737226	44	0.431373	N/A	N/A
	N/A	3	0.00630252	30	0.111111	1	0.00729927	21	0.205882	N/A	N/A
1p/19q	Codel	157	0.329832	81	0.3	50	0.364964	N/A	N/A	N/A	N/A
	Non-codel	323	0.678571	157	0.581481	85	0.620438	N/A	N/A	N/A	N/A
	N/A	0	0	32	0.118519	2	0.0145985	N/A	N/A	N/A	N/A
