# Supplementary material for: Comprehensive analysis of the prognostic implications and functional exploration of PAK gene family in human cancer
Source: Cancer Cell Int. 2022 Sep 5;22:275. doi: 10.1186/s12935-022-02689-6 (PMC9442929; doi:10.1186/s12935-022-02689-6)
Supplement: Supplementary file 27 — Additional file 27: Table S3. Primer information of PAK1, GAPDH and AKT1. [file 12935_2022_2689_MOESM27_ESM.xlsx]

## Sheet: Sheet1
PAK1		Sequence (5' -> 3')	Length	Tm	Location
	Forward Primer	CAGCCCCTCCGATGAGAAATA	21	61.1	38-58
	Reverse Primer	CAAAACCGACATGAATTGTGTGT	23	60.2	268-246
GAPDH		Sequence (5' -> 3')	Length	Tm	Location
	Forward Primer	CTCACCGGATGCACCAATGTT	21	63	585-605
	Reverse Primer	CGCGTTGCTCACAATGTTCAT	21	62.1	666-646
AKT1		Sequence (5' -> 3')	Length	Tm	Location
	Forward Primer	AGCGACGTGGCTATTGTGAAG	21	62.7	4-24
	Reverse Primer	GCCATCATTCTTGAGGAGGAAGT	23	61.9	99-77
