# Supplementary material for: Comprehensive analysis of the prognostic implications and functional exploration of PAK gene family in human cancer
Source: Cancer Cell Int. 2022 Sep 5;22:275. doi: 10.1186/s12935-022-02689-6 (PMC9442929; doi:10.1186/s12935-022-02689-6)
Supplement: Supplementary file 29 — Additional file 28: Table S5. The HR and P value between PAKs gene expression with the OS, DFS, PFI, and DSS of patients with different cancer types. [file 12935_2022_2689_MOESM29_ESM.xlsx]

## Sheet: OS
	PAK1				PAK2				PAK3				PAK4				PAK6				PAK7
cancer	HR	HR.95L	HR.95H	pvalue	HR	HR.95L	HR.95H	pvalue	HR	HR.95L	HR.95H	pvalue	HR	HR.95L	HR.95H	pvalue	HR	HR.95L	HR.95H	pvalue	HR	HR.95L	HR.95H	pvalue
ACC	1.96288	1.24223	3.10162	0.00386248	2.03993	1.20254	3.46043	0.00819352	1.66537	0.646466	4.2902	0.290775	3.35369	1.77903	6.32212	0.000183401	1.43928	0.190886	10.8522	0.723876	0.618063	0.453406	0.842517	0.00233393
BLCA	0.94645	0.802444	1.1163	0.513405	1.23735	0.955951	1.60157	0.105714	0.968002	0.74196	1.26291	0.810578	1.04241	0.839019	1.29512	0.707597	2.13568	1.09587	4.1621	0.0258209	0.963124	0.678182	1.36778	0.833709
BRCA	0.858083	0.708808	1.0388	0.116502	1.22419	0.95833	1.5638	0.105394	0.934624	0.742465	1.17652	0.5648	1.10125	0.854845	1.41869	0.455463	6.45818	2.26023	18.453	0.000497114	0.694726	0.480554	1.00435	0.052759
CHOL	1.12966	0.593688	2.1495	0.71031	0.534003	0.215109	1.32565	0.176277	0.780207	0.277072	2.19699	0.638443	0.946632	0.419384	2.13673	0.894955	5.22559	0.126794	215.363	0.383476	1.03605	0.752301	1.42681	0.828313
COAD	0.829381	0.546873	1.25783	0.378632	1.12371	0.770789	1.63823	0.544236	1.50492	0.731424	3.0964	0.266851	1.32678	0.960207	1.83331	0.086558	2.1336	0.249827	18.2217	0.48862	0.866286	0.49625	1.51224	0.613583
DLBC	1.68866	0.713142	3.99862	0.233543	0.727298	0.281297	1.88044	0.51119	0.736972	0.0503208	10.7933	0.823643	0.573686	0.147546	2.2306	0.422541	0.00934887	8.86043e-09	9864.24	0.509056	0.26214	2.93491e-07	234138	0.848127
ESCA	0.858707	0.60598	1.21683	0.391725	0.897332	0.621959	1.29463	0.562426	0.9388	0.66782	1.31973	0.716284	0.720135	0.440541	1.17718	0.190397	0.662991	0.269334	1.63201	0.371198	0.943054	0.658068	1.35146	0.749439
GBM	1.44074	1.08762	1.9085	0.0109127	0.945919	0.649769	1.37705	0.771684	1.04126	0.889818	1.21848	0.614131	1.05079	0.7644	1.44449	0.760238	2.32258	0.72765	7.41342	0.15472	0.937104	0.814675	1.07793	0.363135
HNSC	1.06171	0.904586	1.24612	0.463695	1.11708	0.933335	1.337	0.22723	0.719181	0.530613	0.974762	0.0336096	1.12031	0.908105	1.38211	0.289003	0.882227	0.513138	1.51679	0.650398	1.10685	0.937933	1.30619	0.229535
KICH	5.17583	1.48472	18.0433	0.00987202	6.33699	1.54103	26.0589	0.0104851	30.0102	0.0320655	28086.6	0.32982	0.433018	0.133074	1.40902	0.16442	6.74201	0.353364	128.634	0.20462	1.39493	0.854694	2.27665	0.182944
KIRC	0.706285	0.547484	0.911148	0.00744976	0.765787	0.611822	0.958497	0.0198009	1.02598	0.814929	1.29169	0.827218	0.882737	0.666138	1.16977	0.385214	0.147248	0.0067382	3.21778	0.223487	0.769172	0.461946	1.28072	0.313051
KIRP	1.36961	0.818111	2.29289	0.231558	1.87127	1.15041	3.04382	0.011588	1.30359	0.643285	2.64169	0.461899	1.03763	0.628904	1.71198	0.885038	0.428611	0.0140337	13.0905	0.627213	1.08783	0.363566	3.2549	0.880334
LAML	1.37952	1.08911	1.74736	0.00763616	0.923499	0.579143	1.47261	0.738163	0.46702	0.0377527	5.77727	0.552994	0.83746	0.564301	1.24285	0.378515	1.02959	0.386235	2.74456	0.953523	0.00492499	5.54617e-07	43.7339	0.252013
LGG	1.09604	0.967024	1.24228	0.15123	1.49009	1.06688	2.08118	0.0192965	0.762925	0.654933	0.888724	0.000511103	2.19768	1.61249	2.99526	6.2176e-07	0.921244	0.521388	1.62775	0.777602	0.612301	0.523456	0.716224	8.64e-10
LIHC	1.3161	1.07829	1.60635	0.00690861	1.48733	1.13729	1.9451	0.00373564	0.993629	0.727698	1.35674	0.967922	1.28452	1.04151	1.58423	0.01928	2.06343	0.000502285	8476.71	0.864517	0.936411	0.616474	1.42239	0.758055
LUAD	1.3042	1.03991	1.63567	0.0215252	1.40346	1.10266	1.78632	0.0058864	0.896817	0.778842	1.03266	0.130195	1.35779	1.1105	1.66015	0.00286581	0.779467	0.255709	2.37602	0.661301	0.702053	0.326836	1.50803	0.364486
LUSC	0.886855	0.750872	1.04746	0.157389	0.965723	0.781775	1.19295	0.746316	0.885619	0.698157	1.12342	0.316845	1.14114	0.956453	1.36148	0.142735	0.827697	0.442516	1.54815	0.553902	0.926669	0.828379	1.03662	0.183098
OV	0.8922	0.752138	1.05834	0.190487	1.20926	0.965529	1.51452	0.0980237	1.04691	0.83053	1.31968	0.697946	1.1688	1.01343	1.34799	0.03209	2.19674	0.950434	5.07732	0.0656161	0.933619	0.737832	1.18136	0.567318
PAAD	1.43649	1.08339	1.90468	0.0118548	1.92097	1.30288	2.83227	0.000982042	0.770738	0.643902	0.922558	0.00453107	1.13484	0.846235	1.52188	0.398191	0.0688803	0.0082935	0.572074	0.0132474	0.649689	0.454959	0.927765	0.0176722
PRAD	1.26327	0.613392	2.60167	0.52607	2.41741	0.815999	7.16159	0.111162	1.07963	0.349441	3.33564	0.89409	2.39544	0.823877	6.96479	0.108671	0.425609	0.00179976	100.649	0.759366	1.50895	0.283952	8.01868	0.62928
READ	0.409291	0.22182	0.755201	0.0042588	0.91757	0.473205	1.77922	0.799017	1.80772	0.220444	14.8239	0.5813	0.819799	0.462344	1.45362	0.496541	0.0906156	7.09756e-05	115.69	0.510531	0.000103096	3.68343e-12	2885.58	0.294054
SARC	0.984947	0.729533	1.32978	0.921115	1.27665	0.881284	1.84939	0.196483	0.84234	0.720693	0.98452	0.0310829	1.20815	0.918761	1.58869	0.175901	0.319974	0.0392765	2.60674	0.286995	1.03231	0.740553	1.43902	0.851141
SKCM	0.958328	0.825157	1.11299	0.577117	0.833065	0.689729	1.00619	0.0579709	0.826087	0.670489	1.01779	0.0727614	1.55052	1.26789	1.89616	1.9403e-05	8.42531	2.48482	28.5678	0.000623961	1.1002	0.790772	1.5307	0.570897
STAD	0.981634	0.757271	1.27247	0.888652	1.0975	0.826642	1.4571	0.519991	1.31526	1.07737	1.60568	0.00710006	0.967491	0.787103	1.18922	0.753585	1.14809	0.336143	3.92127	0.825593	1.31414	0.915103	1.88719	0.139009
TGCT	2.2385	0.443917	11.2879	0.328986	2.4721	0.271924	22.4741	0.421599	0.221091	0.011256	4.34269	0.320529	0.412452	0.102471	1.66014	0.212577	0.188195	7.06877e-07	50104.2	0.793276	0.464558	0.0201316	10.7202	0.632129
THCA	0.810293	0.38414	1.70921	0.580683	1.96799	0.681074	5.68661	0.21111	1.38226	0.870962	2.19372	0.169535	1.62665	0.572256	4.62381	0.361361	7.56384	0.389511	146.881	0.181235	13.2848	0.401304	439.783	0.147443
UCEC	1.09261	0.817706	1.45992	0.54921	1.25048	0.94516	1.65444	0.117567	1.88773	1.35951	2.62119	0.000148377	1.2261	0.927518	1.6208	0.152275	5.04086	0.696781	36.4681	0.109127	0.853817	0.642147	1.13526	0.276935
UCS	0.722854	0.35249	1.48236	0.375774	0.988995	0.487042	2.00827	0.975573	0.810485	0.465425	1.41137	0.457805	0.824505	0.5619	1.20984	0.323969	1.21364	0.116906	12.5992	0.871165	0.605199	0.347549	1.05386	0.0759633

## Sheet: DFI
	PAK1				PAK2				PAK3				PAK4				PAK6				PAK7
cancer	HR	HR.95L	HR.95H	pvalue	HR	HR.95L	HR.95H	pvalue	HR	HR.95L	HR.95H	pvalue	HR	HR.95L	HR.95H	pvalue	HR	HR.95L	HR.95H	pvalue	HR	HR.95L	HR.95H	pvalue
ACC	1.68901	0.863274	3.30458	0.125863	3.06105	1.09132	8.58601	0.0335014	0.432832	0.0306852	6.10533	0.535155	2.10164	0.954788	4.62604	0.0650329	1.01774	0.0313863	33.0013	0.992097	0.682229	0.430466	1.08124	0.103625
BLCA	1.51974	0.984462	2.34605	0.0588549	1.28045	0.678603	2.41608	0.445392	1.31537	0.763294	2.26676	0.323545	0.853699	0.485324	1.50168	0.583045	2.41366	0.5346	10.8974	0.251918	0.994014	0.418105	2.3632	0.989158
BRCA	0.766882	0.596405	0.986087	0.0385285	0.907749	0.654173	1.25962	0.562542	0.909233	0.657775	1.25682	0.564564	0.985188	0.70736	1.37214	0.929649	9.37089	2.36063	37.1992	0.00146749	0.59191	0.346407	1.0114	0.0550493
CESC	0.970118	0.548916	1.71452	0.916841	1.0502	0.570801	1.93222	0.874891	1.29374	0.733612	2.28153	0.373606	2.36055	1.37702	4.04656	0.00178806	0.827921	0.191213	3.58475	0.800618	1.19548	0.58514	2.44245	0.624267
CHOL	0.992774	0.376668	2.61663	0.988298	0.606557	0.153327	2.39952	0.476133	0.646086	0.158139	2.63962	0.542989	2.22104	0.857828	5.75058	0.100172	11.5799	0.0572753	2341.2	0.365895	0.894277	0.571697	1.39887	0.624487
COAD	1.96564	0.784594	4.92453	0.14923	1.45381	0.690489	3.06096	0.324612	1.10637	0.215271	5.68614	0.903664	1.75641	0.87483	3.52639	0.11321	1.14405	0.0192112	68.1294	0.948541	1.10708	0.252112	4.86144	0.892808
DLBC	3.62279	0.229268	57.2457	0.360676	2.09118	0.720303	6.07109	0.174897	0.834726	0.0121626	57.2878	0.933271	0.98771	0.0597169	16.3366	0.993108	4.21619e-24	3.75035e-75	4.73991e+27	0.369492	2317.48	1.24001e-15	4.3312e+21	0.71813
ESCA	0.946151	0.578828	1.54658	0.825266	1.18194	0.568055	2.45925	0.654766	1.09781	0.683727	1.76267	0.699309	0.75302	0.333111	1.70225	0.495456	1.28204	0.341146	4.81797	0.713006	1.12459	0.714137	1.77096	0.61229
HNSC	0.882496	0.517508	1.5049	0.646214	0.963768	0.571106	1.6264	0.89006	0.835482	0.411177	1.69764	0.619257	0.762164	0.390999	1.48567	0.425148	0.706919	0.14722	3.39446	0.664819	0.664897	0.200962	2.19987	0.503797
KICH	0.728754	0.107725	4.92998	0.745636	1.9734	0.318241	12.237	0.4653	703.364	3.46125e-09	142931363218700	0.621666	0.520976	0.0540943	5.01745	0.572588	25.8504	0.0317221	21065.6	0.341618	0.134428	0.00656372	2.75314	0.192717
KIRC	1.11048	0.435065	2.83446	0.8265	1.5458	0.631657	3.78289	0.340163	1.39028	0.718194	2.69131	0.328202	1.79445	0.647259	4.97489	0.261081	0.122999	6.78628e-05	222.931	0.584065	0.21995	0.00184741	26.1868	0.534607
KIRP	1.5978	0.855476	2.98427	0.141497	1.71561	0.950124	3.09784	0.0734105	2.10494	0.984804	4.49913	0.0548005	1.05406	0.576071	1.92865	0.864384	1.76335	0.101759	30.5567	0.696718	0.777087	0.109863	5.49652	0.800521
LGG	0.829947	0.609848	1.12948	0.235807	0.764649	0.362323	1.61372	0.481326	0.625748	0.430024	0.910556	0.0143033	3.96326	1.64997	9.51985	0.00207029	0.284775	0.0545115	1.4877	0.136474	0.595649	0.414355	0.856264	0.00514231
LIHC	1.20862	1.00201	1.45784	0.0475991	1.10329	0.849665	1.43261	0.460792	0.91893	0.68544	1.23196	0.571899	1.18854	0.968655	1.45835	0.097954	0.582969	0.000178629	1902.57	0.895993	1.25778	0.992248	1.59436	0.0580076
LUAD	1.1733	0.852568	1.61469	0.326614	1.42063	1.01023	1.99775	0.0435421	0.997088	0.831728	1.19532	0.974852	1.03642	0.808031	1.32936	0.778209	2.76009	0.597309	12.7541	0.193574	1.24686	0.615841	2.52447	0.539857
LUSC	1.18466	0.87874	1.59707	0.266216	1.14257	0.744469	1.75355	0.541983	1.12356	0.798506	1.58093	0.503754	1.52826	1.11334	2.09782	0.00868365	0.76239	0.244508	2.37718	0.640088	1.07469	0.880646	1.31148	0.478347
OV	0.838137	0.645275	1.08864	0.185701	1.22573	0.924026	1.62594	0.15799	1.41087	1.03298	1.92701	0.0304695	0.958798	0.78895	1.16521	0.672329	1.42429	0.412099	4.9226	0.576197	1.00206	0.754389	1.33105	0.988644
PAAD	1.27899	0.78056	2.0957	0.328736	5.87413	1.96812	17.5321	0.00150578	0.707543	0.484642	1.03296	0.0731377	1.0627	0.569866	1.98174	0.848324	0.13219	0.00350837	4.98069	0.274463	0.581298	0.301957	1.11906	0.104513
PCPG	0.841103	0.231335	3.05813	0.792752	5.88394	0.56748	61.0079	0.137496	0.41915	0.193405	0.908388	0.0275633	0.847912	0.0930296	7.72823	0.883667	0.569036	0.005326	60.7965	0.812999	1.5263	0.529773	4.39735	0.433499
PRAD	1.18021	0.725801	1.91912	0.504149	0.856193	0.476349	1.53893	0.603773	0.45861	0.22159	0.949154	0.0356779	2.39389	1.12462	5.09568	0.023533	9.70779	0.646473	145.778	0.100099	0.37243	0.115714	1.19868	0.097699
READ	0.26684	0.0440228	1.61743	0.150729	1.51836	0.312636	7.37411	0.604494	19.358	0.119037	3148.04	0.254012	0.789998	0.13118	4.75755	0.796929	14.7503	1.51158e-05	1.43936e+07	0.702106	0.000396084	7.59495e-13	206562	0.444305
SARC	1.52964	1.06526	2.19645	0.0213118	1.09384	0.723696	1.65329	0.670418	0.977712	0.821088	1.16421	0.800238	1.35451	0.94135	1.94901	0.102171	0.636178	0.0720544	5.61689	0.684015	0.945523	0.613003	1.45842	0.800003
STAD	0.958019	0.556343	1.6497	0.877084	1.31763	0.753107	2.30531	0.333809	1.56128	1.15572	2.10914	0.00369571	0.869827	0.57868	1.30745	0.502412	2.60882	0.288832	23.5636	0.393127	1.32517	0.684627	2.56502	0.403411
TGCT	1.0119	0.615209	1.66439	0.962829	1.06757	0.561631	2.0293	0.841845	0.81426	0.453688	1.4614	0.491093	1.75384	0.74112	4.1504	0.201147	0.64761	0.0185885	22.5623	0.81047	1.11735	0.591139	2.11197	0.732663
THCA	0.640729	0.374272	1.09689	0.104625	1.73605	0.781742	3.85534	0.175391	0.757666	0.480804	1.19395	0.2317	0.61004	0.317752	1.17119	0.137513	0.209819	0.009444	4.66161	0.323652	0.29854	0.00220687	40.3858	0.629231
UCEC	1.10296	0.731405	1.66326	0.640092	1.14983	0.808006	1.63627	0.437971	1.38359	0.864459	2.21448	0.176052	1.37547	0.953765	1.98364	0.0879042	6.78307	0.507528	90.6553	0.147824	0.826911	0.582682	1.17351	0.287266
UCS	0.537683	0.105016	2.75295	0.456483	0.930658	0.255838	3.38544	0.913145	1.06947	0.399926	2.85992	0.893545	0.749712	0.37533	1.49753	0.414484	3.13881	0.10438	94.3869	0.510095	0.736767	0.283473	1.91492	0.53076

## Sheet: PFI
	PAK1				PAK2				PAK3				PAK4				PAK6				PAK7
cancer	HR	HR.95L	HR.95H	pvalue	HR	HR.95L	HR.95H	pvalue	HR	HR.95L	HR.95H	pvalue	HR	HR.95L	HR.95H	pvalue	HR	HR.95L	HR.95H	pvalue	HR	HR.95L	HR.95H	pvalue
ACC	1.51208	1.06495	2.14694	0.0207883	2.45026	1.55632	3.85767	0.000108798	0.821957	0.323538	2.0882	0.680222	3.16913	1.94217	5.17123	3.89303e-06	2.07046	0.425261	10.0804	0.367494	0.713143	0.562834	0.903593	0.00511962
BLCA	1.02371	0.864309	1.21252	0.786095	1.32751	1.01962	1.72836	0.0353519	1.03709	0.797713	1.3483	0.785625	0.98878	0.792549	1.2336	0.920365	1.89669	0.968692	3.71368	0.0618765	1.05542	0.758648	1.46829	0.748802
BRCA	0.827816	0.683023	1.0033	0.0540631	1.02162	0.795976	1.31122	0.866614	1.01199	0.801562	1.27766	0.920188	1.01385	0.78681	1.30642	0.915286	6.75755	2.31496	19.7258	0.000472832	0.673015	0.459301	0.986172	0.0422146
CHOL	0.883519	0.494212	1.57949	0.676083	0.481413	0.192492	1.20399	0.118045	0.544785	0.208011	1.4268	0.216308	1.47946	0.695904	3.14525	0.308758	13.851	0.287276	667.823	0.183787	1.03664	0.765954	1.40298	0.815726
COAD	0.845402	0.583655	1.22453	0.374313	1.19323	0.848956	1.67711	0.309077	1.47673	0.81096	2.68909	0.202391	1.24958	0.955757	1.63374	0.103292	2.088	0.323828	13.4631	0.438806	0.779975	0.412951	1.4732	0.443757
DLBC	2.73435	1.19731	6.24459	0.0169707	1.5418	0.828846	2.86801	0.171571	1.22072	0.154669	9.63452	0.849926	0.812975	0.227036	2.91111	0.750376	2.62635	0.00192171	3589.36	0.79323	0.175146	2.16997e-07	141366	0.801779
ESCA	0.985942	0.74248	1.30924	0.922056	1.08417	0.778698	1.50946	0.632232	0.93011	0.683024	1.26658	0.645587	1.04851	0.674183	1.63068	0.833483	1.04114	0.493026	2.19861	0.915813	1.11676	0.849955	1.46731	0.427886
GBM	1.29146	0.96479	1.72873	0.085605	0.885033	0.592774	1.32139	0.550364	0.953635	0.812553	1.11921	0.561111	0.839039	0.607324	1.15916	0.287203	1.60009	0.458156	5.58824	0.461315	0.927006	0.802376	1.07099	0.303527
HNSC	1.0946	0.918566	1.30437	0.312286	1.05317	0.870194	1.27463	0.594686	0.740748	0.54217	1.01206	0.0594715	0.950607	0.75888	1.19077	0.659392	0.935305	0.525404	1.66499	0.820186	0.999042	0.820251	1.2168	0.992398
KICH	1.97856	0.783954	4.99355	0.148556	3.10658	1.07637	8.96611	0.0360774	21.3799	0.03953	11563.4	0.340194	0.48705	0.175326	1.35301	0.167586	15.8798	1.04551	241.192	0.0463683	1.1612	0.750342	1.79702	0.50235
KIRC	0.715824	0.550035	0.931585	0.0128758	0.844382	0.668081	1.06721	0.156892	1.13429	0.902019	1.42637	0.281092	1.03539	0.760806	1.40909	0.824915	0.186289	0.0102909	3.37227	0.255418	0.506842	0.219756	1.16897	0.110983
KIRP	1.23963	0.796794	1.9286	0.340784	1.46765	0.972488	2.21492	0.0676839	1.45992	0.805586	2.64575	0.212279	0.934689	0.605706	1.44236	0.760255	0.788478	0.0625128	9.94512	0.8542	0.960882	0.289978	3.18401	0.94795
LGG	1.05291	0.952599	1.16378	0.312823	1.25779	0.967976	1.63436	0.0860911	0.742927	0.657384	0.839602	1.92585e-06	1.87277	1.46332	2.39679	6.21374e-07	0.87035	0.545369	1.38898	0.560401	0.658315	0.581207	0.745651	4.78049e-11
LIHC	1.24266	1.05128	1.46889	0.0108976	1.30689	1.03756	1.64613	0.0230172	0.876163	0.663479	1.15702	0.351399	1.26404	1.05523	1.51418	0.0109748	2.11387	0.00238323	1874.96	0.828884	1.26363	1.01722	1.56973	0.0344951
LUAD	1.26167	1.02386	1.55471	0.0291642	1.34319	1.08171	1.66788	0.00756216	0.967545	0.852269	1.09841	0.610229	1.10086	0.919571	1.3179	0.295243	1.23769	0.436978	3.50561	0.688092	0.978299	0.536974	1.78234	0.942853
LUSC	0.964017	0.790503	1.17562	0.717389	1.02032	0.78751	1.32195	0.879025	1.04866	0.816142	1.34742	0.710277	1.33825	1.08698	1.6476	0.00603267	0.672392	0.317095	1.42579	0.300675	0.926475	0.80908	1.0609	0.269278
OV	0.942465	0.798684	1.11213	0.482915	1.15966	0.954655	1.40869	0.135589	1.0488	0.85492	1.28666	0.647735	1.00357	0.876514	1.14903	0.958902	1.36453	0.581651	3.20114	0.474971	0.96774	0.78005	1.20059	0.765629
PAAD	1.16176	0.910825	1.48184	0.227179	1.9093	1.31846	2.76491	0.000618426	0.751453	0.633929	0.890766	0.000991148	1.06256	0.79262	1.42442	0.684917	0.0247881	0.0025654	0.239514	0.00139895	0.641368	0.460249	0.893761	0.00870675
PRAD	1.22959	0.931537	1.623	0.144498	1.06723	0.748567	1.52154	0.719177	0.561206	0.371996	0.846656	0.00589828	1.62944	1.0748	2.47031	0.0214638	2.98271	0.543559	16.3672	0.208343	0.551242	0.291759	1.0415	0.0665511
READ	0.945057	0.488975	1.82654	0.866515	1.16909	0.651137	2.09906	0.600845	1.89094	0.280817	12.733	0.512646	1.3352	0.934427	1.90786	0.112396	0.473353	0.00131749	170.068	0.803264	4.31266	0.518532	35.8687	0.176278
SARC	1.19795	0.936208	1.53286	0.151032	1.16724	0.858562	1.58689	0.323729	1.00087	0.884846	1.1321	0.989014	1.05774	0.842607	1.32779	0.628511	0.432108	0.0874787	2.13444	0.303197	0.955536	0.702965	1.29885	0.771503
SKCM	0.947202	0.834822	1.07471	0.3999	0.928366	0.790333	1.09051	0.365453	0.854984	0.719844	1.0155	0.0742949	1.19267	1.00687	1.41276	0.0414339	2.18643	0.627859	7.61392	0.219136	0.961962	0.688578	1.34389	0.820167
STAD	0.890798	0.669113	1.18593	0.428353	1.19124	0.874996	1.62178	0.266282	1.35242	1.09502	1.67034	0.00506928	1.13628	0.91185	1.41596	0.255117	2.38635	0.669274	8.50873	0.179956	1.53277	1.09826	2.13918	0.0120369
TGCT	1.09049	0.687655	1.72931	0.712709	1.19878	0.65659	2.1887	0.554998	0.771505	0.449352	1.32462	0.3469	1.42561	0.698255	2.91065	0.330201	1.36405	0.0583714	31.8759	0.846891	1.08629	0.614482	1.92034	0.77586
THCA	0.684279	0.462235	1.01299	0.0580273	1.237	0.715753	2.13783	0.446102	0.79859	0.583477	1.09301	0.160151	0.787068	0.480763	1.28853	0.341081	0.495707	0.0664198	3.69958	0.493783	0.113913	0.00235085	5.51978	0.272575
UCEC	1.01604	0.787122	1.31154	0.902743	1.24921	0.98179	1.58948	0.0702275	1.41613	1.03175	1.9437	0.0312835	1.15063	0.901637	1.46838	0.259432	5.17241	0.966191	27.69	0.0548852	0.83348	0.65336	1.06326	0.142588
UCS	0.762252	0.398459	1.45819	0.412062	0.998877	0.512745	1.94591	0.997364	0.767769	0.450244	1.30922	0.331798	0.798693	0.551083	1.15756	0.235152	0.977009	0.111291	8.57703	0.983257	0.713383	0.437305	1.16375	0.17618

## Sheet: DSS
	PAK1				PAK2				PAK3				PAK4				PAK6				PAK7
cancer	HR	HR.95L	HR.95H	pvalue	HR	HR.95L	HR.95H	pvalue	HR	HR.95L	HR.95H	pvalue	HR	HR.95L	HR.95H	pvalue	HR	HR.95L	HR.95H	pvalue	HR	HR.95L	HR.95H	pvalue
ACC	1.89836	1.18898	3.03098	0.00725186	1.9525	1.12538	3.38753	0.0173063	1.48156	0.533183	4.11685	0.45092	3.40417	1.7686	6.55227	0.000245751	1.5793	0.201452	12.3811	0.663589	0.630483	0.458894	0.866232	0.00442762
BLCA	1.01873	0.831459	1.24819	0.857877	1.35876	0.989881	1.86511	0.0578242	0.928125	0.663185	1.29891	0.6636	0.915131	0.702357	1.19236	0.511265	2.57893	1.18871	5.59507	0.0165111	1.02668	0.69067	1.52616	0.896428
BRCA	0.811926	0.629163	1.04778	0.109319	1.0582	0.76269	1.46821	0.734933	0.979835	0.722421	1.32897	0.895772	0.971266	0.695614	1.35615	0.864078	11.2706	2.9112	43.6334	0.000452891	0.848394	0.542167	1.32758	0.471743
CHOL	0.977329	0.498621	1.91563	0.946753	0.495489	0.189343	1.29664	0.152517	1.00028	0.357422	2.79939	0.999573	0.94931	0.401643	2.24376	0.905646	5.81043	0.110958	304.268	0.383586	1.09006	0.780617	1.52217	0.612738
COAD	0.741322	0.437257	1.25683	0.266451	1.09917	0.682166	1.77108	0.697659	1.63947	0.704981	3.81265	0.250925	1.56141	1.00146	2.43443	0.0492503	2.76679	0.188867	40.5318	0.457454	0.78327	0.319298	1.92144	0.593657
DLBC	2.92381	0.89361	9.56642	0.0760676	0.972285	0.300671	3.14409	0.962563	0.484357	0.00706746	33.1947	0.736789	0.397278	0.0593943	2.65732	0.34108	0.198816	1.17796e-08	3.35562e+06	0.849112	2.73277	5.29415e-06	1.41062e+06	0.88093
ESCA	0.820901	0.540687	1.24634	0.354268	1.02646	0.662512	1.59034	0.906932	1.04611	0.721092	1.51762	0.812301	0.882122	0.492455	1.58012	0.673233	0.753034	0.263319	2.15351	0.596746	1.06296	0.733197	1.54104	0.747288
GBM	1.48986	1.10172	2.01473	0.00962338	0.997339	0.671347	1.48162	0.989471	1.07667	0.91045	1.27323	0.387906	1.08414	0.772892	1.52072	0.639869	2.6399	0.813966	8.56186	0.105861	0.942791	0.811576	1.09522	0.44104
HNSC	1.07728	0.873395	1.32875	0.486819	1.1288	0.889714	1.43214	0.318429	0.671928	0.444253	1.01628	0.0596391	1.04937	0.791658	1.39097	0.737521	0.890657	0.440963	1.79895	0.746817	0.978795	0.765485	1.25155	0.864306
KICH	5.88892	1.25542	27.6236	0.0245493	8.80361	1.56892	49.3995	0.0134449	23.8135	0.00932437	60817.2	0.428358	0.317539	0.0838641	1.20232	0.0912717	6.69819	0.241549	185.742	0.261905	1.60902	0.901992	2.87026	0.107254
KIRC	0.618341	0.453251	0.843564	0.0024175	0.727665	0.552176	0.958925	0.0239557	1.0665	0.803156	1.41619	0.656349	0.863765	0.609288	1.22453	0.410815	0.102841	0.00145999	7.24405	0.294736	0.617499	0.265055	1.43858	0.26391
KIRP	1.44168	0.768768	2.70362	0.254173	2.09158	1.15388	3.79129	0.0150314	1.82052	0.86743	3.82083	0.113202	1.20272	0.633268	2.28423	0.57275	0.977962	0.0368201	25.9752	0.989374	1.23192	0.352897	4.30047	0.74367
LGG	1.06297	0.930221	1.21467	0.369597	1.5835	1.11196	2.25501	0.0108239	0.736131	0.626055	0.865561	0.00020969	2.2795	1.64517	3.15841	7.3431e-07	0.813718	0.435696	1.51972	0.517768	0.576538	0.488107	0.68099	9.0215e-11
LIHC	1.3007	1.00653	1.68085	0.0444594	1.5202	1.0745	2.1508	0.0179908	0.884792	0.562113	1.3927	0.59692	1.29271	0.983234	1.69958	0.065936	0.453266	4.95582e-06	41456.4	0.892012	0.880495	0.458536	1.69075	0.702219
LUAD	1.35083	1.00863	1.80914	0.0436311	1.64049	1.21105	2.22221	0.00139074	0.847565	0.703177	1.0216	0.0826191	1.34929	1.05459	1.72633	0.0171843	0.932601	0.225245	3.86132	0.923316	0.861006	0.369736	2.00503	0.728597
LUSC	0.822918	0.635	1.06645	0.140601	0.969013	0.694901	1.35125	0.852804	0.980421	0.699963	1.37325	0.908436	1.25954	0.951174	1.66788	0.107273	0.649492	0.237157	1.77874	0.401144	0.826709	0.686634	0.995359	0.0445292
OV	0.853237	0.700844	1.03877	0.113857	1.22336	0.958081	1.56209	0.10597	1.1122	0.875299	1.41322	0.384225	1.12777	0.966031	1.31659	0.127908	2.06042	0.834239	5.08885	0.117094	0.938402	0.730189	1.20599	0.619407
PAAD	1.3003	0.959002	1.76306	0.0909376	2.05718	1.32532	3.19318	0.0013023	0.778729	0.636042	0.953426	0.0154435	1.23316	0.890775	1.70714	0.206605	0.0379273	0.00257018	0.559681	0.0171921	0.640184	0.428527	0.956382	0.0294262
PRAD	0.930601	0.350729	2.4692	0.885134	4.41793	0.738156	26.4418	0.103652	0.288834	0.0330315	2.52562	0.261637	4.564	1.23777	16.8287	0.022586	0.0205813	7.92194e-07	534.704	0.453998	0.918826	0.0534453	15.7964	0.953482
READ	0.616986	0.225194	1.69042	0.347689	0.79982	0.313018	2.04369	0.640737	0.0142523	3.25333e-05	6.24367	0.170759	1.37755	0.796524	2.3824	0.251791	4.82616	0.000675532	34479.1	0.728102	2.12227e-10	2.03379e-26	2.2146e+06	0.236581
SARC	0.951722	0.684988	1.32232	0.768071	1.22246	0.818128	1.82662	0.326939	0.865284	0.730112	1.02548	0.0949966	1.06844	0.791037	1.44313	0.666006	0.34703	0.0359681	3.34823	0.360141	1.10611	0.791085	1.54659	0.555402
SKCM	0.943104	0.799619	1.11234	0.486643	0.853971	0.688999	1.05844	0.149484	0.860042	0.691905	1.06904	0.174314	1.48181	1.19076	1.844	0.000423713	5.37379	1.29203	22.3506	0.0207618	1.15796	0.837245	1.60152	0.375422
STAD	0.929559	0.66805	1.29344	0.664737	1.20875	0.839041	1.74137	0.308768	1.34243	1.03894	1.73458	0.0243143	1.10828	0.853617	1.43893	0.440224	2.06104	0.45834	9.26799	0.345747	1.66741	1.12297	2.47581	0.0112452
TGCT	1.76004	0.327489	9.45908	0.509957	2.33921	0.207605	26.3572	0.491632	0.260431	0.0117956	5.74993	0.394148	0.527369	0.102266	2.71955	0.444545	0.47844	2.61135e-06	87658	0.90509	0.752795	0.0431089	13.1458	0.845709
THCA	0.939385	0.300369	2.93787	0.914405	1.23749	0.273335	5.60259	0.782119	1.5494	0.790648	3.03628	0.202088	4.03312	0.700431	23.2229	0.118448	9.33872	0.117825	740.182	0.316629	12.4039	0.0735785	2091.05	0.335791
UCEC	0.981294	0.687899	1.39982	0.917021	1.44044	1.02981	2.01481	0.0330462	1.83678	1.22984	2.74326	0.00297003	1.21618	0.865951	1.70805	0.258727	3.45381	0.293248	40.6781	0.324602	0.731636	0.500386	1.06976	0.106943
UCS	0.66078	0.304637	1.43328	0.294274	1.02734	0.502278	2.1013	0.941098	0.753735	0.419107	1.35554	0.345116	0.878325	0.593518	1.2998	0.516488	1.13856	0.10653	12.1686	0.914508	0.613592	0.337135	1.11675	0.109918
