# Supplementary material for: Comprehensive analysis of the prognostic implications and functional exploration of PAK gene family in human cancer
Source: Cancer Cell Int. 2022 Sep 5;22:275. doi: 10.1186/s12935-022-02689-6 (PMC9442929; doi:10.1186/s12935-022-02689-6)
Supplement: Supplementary file 30 — Additional file 29: Table S6. Analyzed the survival difference of tumor patients based on methylation degree of PAK1, PAK2, PAK3, PAK4 and PAK6. [file 12935_2022_2689_MOESM30_ESM.xlsx]

## Sheet: PAK1
ID	Description	setSize	enrichmentScore	NES	pvalue	p.adjust	qvalues	rank	leading_edge	core_enrichment
GO_RECEPTOR_COMPLEX	GO_RECEPTOR_COMPLEX	500	0.526655	1.3197	0.0113636	1	1	14504	tags=38%, list=25%, signal=29%	TRGJ2/TRAV9-1/TRAV7/HTR3B/TRBV6-4/CR2/GABRA6/TRAV18/TRBV16/CACNG2/TRAV1-2/TRBJ2-4/CHRNA2/GABRG3/EPHA6/TRDV1/GRIN2B/ACVR1C/GPR101/GPR119/EPHA8/CACNG3/IL5RA/EPHA10/GABRG1/P2RX2/OLFM3/TRAV20/GRM1/TRAV22/GABRB2/GABRA4/TRAV8-4/GABRA5/HTR3A/GABRG2/FCRL5/GFRA4/GRIN3A/GRIN2A/TRAV26-2/TRBJ2-3/IL12RB2/IL12B/TRAV26-1/SHANK2/GABRA1/TRAV8-1/GRIN1/GRM7/TRAV16/TRBV30/TRBJ2-7/TRBV4-2/TRAV24/PRLR/TRDV2/VWC2L/TRAV…
GO_KERATINOCYTE_DIFFERENTIATION	GO_KERATINOCYTE_DIFFERENTIATION	298	0.578936	1.37473	0.0120482	1	1	6472	tags=26%, list=11%, signal=23%	KRTAP1-4/KRTAP6-2/KRTAP10-8/KRTAP19-7/LCE3B/KRTAP12-3/KRTAP2-1/KRTAP12-1/LCE3E/KRTAP9-2/KRTAP12-2/KRTAP9-7/KRTAP9-8/KRTAP24-1/SPRR2F/SPRR2E/SPRR2A/KRTAP17-1/KRTAP26-1/KRTAP10-2/SPRR1B/KRTAP9-1/KRTAP3-3/SPRR3/KRT31/LCE1F/KRTAP19-8/LCE2A/KRTAP27-1/KLK5/KRTAP19-6/KRT13/KRTAP4-8/KRT33B/KRT77/KRTAP5-2/KRTAP29-1/LCE3A/KRT25/SPRR2G/KRT9/KRTAP21-1/KRTAP4-11/KRT6C/KRTAP10-5/KRTAP10-11/KRT4/SPRR1A/KRT74/KR…
GO_TRANSPORTER_COMPLEX	GO_TRANSPORTER_COMPLEX	324	0.570321	1.36236	0.0123457	1	1	17008	tags=46%, list=29%, signal=33%	HTR3B/CNGB1/KCNB2/SCN10A/GABRA6/KCNV1/CACNG2/CHRNA2/GABRG3/RYR2/CLDN17/KCNS2/KCNG3/GRIN2B/TRPC5/GLRA1/CACNA1B/HCN1/CACNG3/KCNA4/KCNJ3/NOS1/KCNC2/GABRG1/CACNA1S/ATP1B4/CACNA1I/OLFM3/GABRB2/GABRA4/GABRA5/HTR3A/GABRG2/GRIN3A/GRIN2A/LRRC52/GLRA3/SHANK2/GABRA1/HCN4/GRIN1/KCNA3/VWC2L/SHANK1/LRRC7/KCNS1/LRRC38/KCNJ1/ABCG8/CACNA1E/CHRNB3/ATP4B/KCNK4/KCNA5/CHRNA3/CNTNAP2/KCNH1/GABRB3/KCNA1/GABRA2/CACNA2D3…
GO_SOMATIC_DIVERSIFICATION_OF_IMMUNE_RECEPTORS_VIA_SOMATIC_MUTATION	GO_SOMATIC_DIVERSIFICATION_OF_IMMUNE_RECEPTORS_VIA_SOMATIC_MUTATION	18	0.883397	1.55833	0.0133333	1	1	484	tags=6%, list=1%, signal=6%	PMS2P6
GO_IMMUNOGLOBULIN_COMPLEX	GO_IMMUNOGLOBULIN_COMPLEX	137	0.679827	1.45309	0.0135135	1	1	12924	tags=68%, list=22%, signal=53%	IGLJ1/IGHD1-1/IGLV3-22/IGHV1OR15-1/IGHV3-38/IGKV1-12/IGHV3-35/IGHV7-81/IGLV9-49/IGLC6/IGHV2-26/IGHJ1/IGKV2D-26/IGLV3-12/IGHV4-28/IGKV1D-12/IGHV1-3/IGHV4-31/IGLV3-16/IGHV4-4/IGHV3-66/IGHV3-72/IGKV6D-21/IGHV2-5/IGKV1-13/IGLV5-37/IGKV1D-33/IGHV3-53/IGHV2-70/IGHV3-48/IGHV3-73/IGHV3-7/IGHV1-58/IGLV3-9/IGKV2D-29/IGKV2-28/IGKV3D-11/IGLV4-3/IGHV3-11/IGHV3-21/IGHV3-64/IGHV6-1/IGLC7/IGKV3D-20/IGLV3-1/IGKV3…
GO_REGULATION_OF_STORE_OPERATED_CALCIUM_ENTRY	GO_REGULATION_OF_STORE_OPERATED_CALCIUM_ENTRY	14	0.890381	1.50217	0.0138889	1	1	388	tags=7%, list=1%, signal=7%	MIR424
GO_MISMATCH_REPAIR_COMPLEX	GO_MISMATCH_REPAIR_COMPLEX	12	0.929553	1.52369	0.0140845	1	1	484	tags=8%, list=1%, signal=8%	PMS2P6
GO_PROTEIN_MATURATION_BY_IRON_SULFUR_CLUSTER_TRANSFER	GO_PROTEIN_MATURATION_BY_IRON_SULFUR_CLUSTER_TRANSFER	11	0.90412	1.49923	0.0140845	1	1	950	tags=9%, list=2%, signal=9%	BOLA2
GO_REGULATION_OF_CELL_CHEMOTAXIS_TO_FIBROBLAST_GROWTH_FACTOR	GO_REGULATION_OF_CELL_CHEMOTAXIS_TO_FIBROBLAST_GROWTH_FACTOR	11	0.891505	1.47831	0.0140845	1	1	666	tags=18%, list=1%, signal=18%	MIR424/MIR15A
GO_REGULATION_OF_INTRACELLULAR_LIPID_TRANSPORT	GO_REGULATION_OF_INTRACELLULAR_LIPID_TRANSPORT	12	0.896842	1.47007	0.0140845	1	1	906	tags=8%, list=2%, signal=8%	SCP2D1
GO_EPIDERMIS_DEVELOPMENT	GO_EPIDERMIS_DEVELOPMENT	457	0.539196	1.33888	0.0235294	1	1	6472	tags=18%, list=11%, signal=16%	KRTAP1-4/KRTAP6-2/KRTAP10-8/KRTAP19-7/LCE3B/KRTAP12-3/KRTAP2-1/KRTAP12-1/LCE3E/KRTAP9-2/KRTAP12-2/KRTAP9-7/KRTAP9-8/KRTAP24-1/SPRR2F/SPRR2E/SPRR2A/KRTAP17-1/KRTAP26-1/KRTAP10-2/SPRR1B/KRTAP9-1/KRTAP3-3/SPRR3/C1orf68/KRT31/LCE1F/LHFPL5/KLK7/KRTAP19-8/LCE2A/KRTAP27-1/KLK5/GRXCR1/KRTAP19-6/KRT13/KRTAP4-8/ATOH1/KRT33B/KRT77/KRTAP5-2/KRTAP29-1/LCE3A/KRT25/SPRR2G/KRT9/KRTAP21-1/KRTAP4-11/KRT6C/KRTAP10-…
GO_PASSIVE_TRANSMEMBRANE_TRANSPORTER_ACTIVITY	GO_PASSIVE_TRANSMEMBRANE_TRANSPORTER_ACTIVITY	456	0.543925	1.35078	0.0235294	1	1	18408	tags=48%, list=32%, signal=33%	HTR3B/KCNK18/CNGB1/KCNB2/OPRM1/CLCA1/AQP12B/SCN10A/GABRA6/KCNV1/CACNG2/KCNK16/CHRNA2/GABRG3/RYR2/CLDN17/KCNS2/CALHM1/KCNG3/GRIN2B/TRPC5/GLRA1/CACNA1B/HCN1/CACNG3/BSND/KCNA4/TRPV6/KCNJ3/KCNC2/GABRG1/CACNA1S/TRPA1/CACNA1I/P2RX2/GABRB2/GABRA4/GABRA5/HTR3A/GABRG2/KCNT1/KCNH7/GRIN3A/SLC5A8/GRIN2A/LRRC52/SLC26A8/GLRA3/GABRA1/HCN4/GRIN1/AQP2/KCNA3/CLCA4/KCNK12/KCNS1/LRRC38/KCNH5/KCNJ1/GJB6/OTOP1/CACNA1E…
GO_SKIN_DEVELOPMENT	GO_SKIN_DEVELOPMENT	413	0.547012	1.34401	0.0240964	1	1	6710	tags=20%, list=11%, signal=17%	KRTAP1-4/KRTAP6-2/KRTAP10-8/KRTAP19-7/LCE3B/KRTAP12-3/KRTAP2-1/KRTAP12-1/LCE3E/KRTAP9-2/KRTAP12-2/KRTAP9-7/KRTAP9-8/KRTAP24-1/SPRR2F/SPRR2E/SPRR2A/KRTAP17-1/KRTAP26-1/KRTAP10-2/SPRR1B/KRTAP9-1/KRTAP3-3/SPRR3/KRT31/LCE1F/KRTAP19-8/LCE2A/KRTAP27-1/KLK5/KRTAP19-6/KRT13/KRTAP4-8/KRT33B/KRT77/KRTAP5-2/KRTAP29-1/LCE3A/KRT25/SPRR2G/KRT9/KRTAP21-1/KRTAP4-11/KRT6C/KRTAP10-5/KRTAP10-11/KRT4/SPRR1A/KRT74/KR…
GO_EPIDERMAL_CELL_DIFFERENTIATION	GO_EPIDERMAL_CELL_DIFFERENTIATION	351	0.565566	1.36223	0.025	1	1	6472	tags=23%, list=11%, signal=20%	KRTAP1-4/KRTAP6-2/KRTAP10-8/KRTAP19-7/LCE3B/KRTAP12-3/KRTAP2-1/KRTAP12-1/LCE3E/KRTAP9-2/KRTAP12-2/KRTAP9-7/KRTAP9-8/KRTAP24-1/SPRR2F/SPRR2E/SPRR2A/KRTAP17-1/KRTAP26-1/KRTAP10-2/SPRR1B/KRTAP9-1/KRTAP3-3/SPRR3/KRT31/LCE1F/LHFPL5/KRTAP19-8/LCE2A/KRTAP27-1/KLK5/GRXCR1/KRTAP19-6/KRT13/KRTAP4-8/ATOH1/KRT33B/KRT77/KRTAP5-2/KRTAP29-1/LCE3A/KRT25/SPRR2G/KRT9/KRTAP21-1/KRTAP4-11/KRT6C/KRTAP10-5/KRTAP10-11/…
GO_GATED_CHANNEL_ACTIVITY	GO_GATED_CHANNEL_ACTIVITY	340	0.571332	1.36584	0.0253165	1	1	15685	tags=46%, list=27%, signal=34%	HTR3B/KCNK18/CNGB1/KCNB2/OPRM1/CLCA1/SCN10A/GABRA6/KCNV1/CACNG2/KCNK16/CHRNA2/GABRG3/RYR2/KCNS2/CALHM1/KCNG3/GRIN2B/GLRA1/CACNA1B/HCN1/CACNG3/KCNA4/KCNJ3/KCNC2/GABRG1/CACNA1S/TRPA1/CACNA1I/P2RX2/GABRB2/GABRA4/GABRA5/HTR3A/GABRG2/KCNT1/KCNH7/GRIN3A/GRIN2A/LRRC52/GLRA3/GABRA1/HCN4/GRIN1/KCNA3/CLCA4/KCNK12/KCNS1/LRRC38/KCNH5/KCNJ1/CACNA1E/CHRNB3/KCNK4/KCNJ12/ANO4/KCNA5/JPH3/KCNH6/CHRNA3/KCNH1/GABRB3…
GO_IMMUNOGLOBULIN_PRODUCTION	GO_IMMUNOGLOBULIN_PRODUCTION	197	0.599808	1.34121	0.0263158	1	1	15267	tags=42%, list=26%, signal=31%	IGLV3-32/PMS2P6/TRAV9-1/IGLV3-22/IGKV1-37/TRAV18/IGLV11-55/IL2/IGKV1-12/TRDV1/IGLV9-49/IGKV2D-26/IGLV3-12/IGKV1D-12/IGLV3-16/IGKV6D-21/IGKV1-13/IGLV5-37/IGKV1D-33/TRDV2/IGKV3-7/IGLV3-9/IGKV2D-29/FCRL3/IGKV2-28/IGKV3D-11/TRAV14DV4/IGLV4-3/TRAV19/IGKV3D-20/IGLV3-1/IGKV3D-7/IGKV2-29/IGKV1-9/TRAV9-2/IGLV6-57/IGKV6-21/IGKV1-17/CD40LG/IGKV1-8/CCR6/TRAV40/GCNT3/IGKV1-16/IGLV3-10/IGLV3-27/IGKV2D-30/IGLV1…
GO_DNA_REPAIR_COMPLEX	GO_DNA_REPAIR_COMPLEX	38	0.800318	1.5153	0.027027	1	1	484	tags=3%, list=1%, signal=3%	PMS2P6
GO_IRON_SULFUR_CLUSTER_ASSEMBLY	GO_IRON_SULFUR_CLUSTER_ASSEMBLY	19	0.867131	1.50516	0.027027	1	1	950	tags=5%, list=2%, signal=5%	BOLA2
GO_MODIFICATION_BY_SYMBIONT_OF_HOST_MORPHOLOGY_OR_PHYSIOLOGY	GO_MODIFICATION_BY_SYMBIONT_OF_HOST_MORPHOLOGY_OR_PHYSIOLOGY	43	0.774882	1.48298	0.027027	1	1	1454	tags=5%, list=2%, signal=5%	DEFA1/DEFA1B
GO_RESPONSE_TO_PLATELET_DERIVED_GROWTH_FACTOR	GO_RESPONSE_TO_PLATELET_DERIVED_GROWTH_FACTOR	20	0.868858	1.5133	0.027027	1	1	1	tags=5%, list=0%, signal=5%	MIR4632
GO_KERATIN_FILAMENT	GO_KERATIN_FILAMENT	94	0.695102	1.4288	0.0273973	1	1	6640	tags=36%, list=11%, signal=32%	KRTAP1-4/KRTAP10-8/KRTAP12-3/KRTAP2-1/KRTAP12-1/KRTAP9-2/KRTAP12-2/KRTAP9-7/KRTAP9-8/KRTAP24-1/KRTAP10-2/KRTAP9-1/KRTAP3-3/KRT13/KRTAP4-8/KRT77/KRTAP5-2/KRTAP29-1/KRTAP4-11/KRT6C/KRTAP10-5/KRTAP10-11/KRT4/KRT74/KRTAP10-9/KRTAP16-1/KRTAP4-3/KRT73/KRTAP5-6/KRT72/KRTAP10-1/EPPK1/KRT76/KRT5
GO_POSITIVE_REGULATION_OF_CELL_MIGRATION_INVOLVED_IN_SPROUTING_ANGIOGENESIS	GO_POSITIVE_REGULATION_OF_CELL_MIGRATION_INVOLVED_IN_SPROUTING_ANGIOGENESIS	36	0.805165	1.48248	0.0273973	1	1	2772	tags=11%, list=5%, signal=11%	MIR487B/MIR31/MIR150/MIR101-2
GO_REGULATION_OF_CELL_MIGRATION_INVOLVED_IN_SPROUTING_ANGIOGENESIS	GO_REGULATION_OF_CELL_MIGRATION_INVOLVED_IN_SPROUTING_ANGIOGENESIS	79	0.735718	1.45761	0.0273973	1	1	2772	tags=9%, list=5%, signal=8%	MIR487B/MIR495/MIR31/MIR424/MIR15A/MIR150/MIR101-2
GO_CELL_MIGRATION_INVOLVED_IN_SPROUTING_ANGIOGENESIS	GO_CELL_MIGRATION_INVOLVED_IN_SPROUTING_ANGIOGENESIS	95	0.7011	1.43076	0.0277778	1	1	2772	tags=7%, list=5%, signal=7%	MIR487B/MIR495/MIR31/MIR424/MIR15A/MIR150/MIR101-2
GO_POSITIVE_REGULATION_OF_BLOOD_VESSEL_ENDOTHELIAL_CELL_MIGRATION	GO_POSITIVE_REGULATION_OF_BLOOD_VESSEL_ENDOTHELIAL_CELL_MIGRATION	76	0.725011	1.43594	0.0277778	1	1	3533	tags=8%, list=6%, signal=7%	MIR487B/MIR31/MIR200A/MIR150/MIR101-2/MIR342
GO_POSITIVE_REGULATION_OF_NECROTIC_CELL_DEATH	GO_POSITIVE_REGULATION_OF_NECROTIC_CELL_DEATH	12	0.862626	1.41399	0.028169	1	1	553	tags=8%, list=1%, signal=8%	MIR107
GO_REGULATION_OF_CARDIAC_MUSCLE_CONTRACTION_BY_REGULATION_OF_THE_RELEASE_OF_SEQUESTERED_CALCIUM_ION	GO_REGULATION_OF_CARDIAC_MUSCLE_CONTRACTION_BY_REGULATION_OF_THE_RELEASE_OF_SEQUESTERED_CALCIUM_ION	23	-0.843481	-1.63652	0.03125	1	1	523	tags=13%, list=1%, signal=13%	CAMK2D/MIR133A2/MIR1-1
GO_MITOCHONDRIAL_TRANSLATIONAL_TERMINATION	GO_MITOCHONDRIAL_TRANSLATIONAL_TERMINATION	88	-0.664514	-1.49272	0.0333333	1	1	16981	tags=85%, list=29%, signal=61%	ERAL1/DAP3/MRPL50/MRPL30/MRPL18/MRPL3/MRPL10/MTRF1/MRPL9/MRPS30/PTCD3/MRPS27/MRPL20/MRPL45/MRPL37/MRPS6/OXA1L/MRPS2/MRPL44/MRPS18B/MRPS14/MRPL17/MRPS33/MRPL49/MRPL16/MRPL39/MRPS18C/MRPL42/AURKAIP1/MRPL23/MRPS34/MRPL47/MRPL2/MRPL48/MRPS21/MRPL32/MRPL55/MRPL57/MRPS22/CHCHD1/MRPL24/MRPS7/MRPL21/MRPS35/MRPS18A/MRPL51/MRPL41/MRPL1/MRPS36/MRPL27/MRPL33/MRPS24/MRPS26/MRPL15/MRPS23/MRPL11/MRPL38/MRPL43/M…
GO_ORGANELLAR_RIBOSOME	GO_ORGANELLAR_RIBOSOME	86	-0.633683	-1.41387	0.0333333	1	1	16261	tags=84%, list=28%, signal=60%	DAP3/MRPL50/MRPL30/MRPL18/MRPL3/MRPL10/MRPL9/MRPS30/MRPS27/MRPL20/MRPL45/MRPL37/MRPS6/MRPS2/MRPL44/MRPS18B/MRPS14/MRPL17/MRPS33/MRPL49/MRPL16/MRPL39/MRPS18C/MRPL42/MRPL23/MRPS34/MRPL47/MRPL2/MRPL48/MTG1/MRPS21/MRPL32/MRPL55/MRPL57/MRPS22/CHCHD1/MRPL24/MRPS7/NDUFAB1/MRPL21/MRPS35/MRPS18A/MRPL51/MPV17L2/MRPL41/MRPS36/MRPL27/MRPL33/MRPS24/MALSU1/MRPS26/MRPL15/MRPL11/MRPL38/MRPL43/MRPS17/MRPS11/MRPL2…
GO_STRUCTURAL_CONSTITUENT_OF_RIBOSOME	GO_STRUCTURAL_CONSTITUENT_OF_RIBOSOME	161	-0.684492	-1.65675	0.0333333	1	1	16261	tags=90%, list=28%, signal=65%	MRPL3/MRPL10/MRPL9/MRPS30/MRPL20/MRPL37/RPL37/MRPS6/RPL6/RPL22/MRPS2/RPL7/MRPS18B/RPS24/MRPS14/MRPL17/RPL3/RPL11/MRPS33/MRPL49/MRPL16/MRPS18C/RPL36AL/RPS6/MRPL42/RPS23/RPL4/MRPL23/MRPS34/MRPL47/RPS25/RPL12/MRPL2/RPL23/RPL30/RPS12/RPS20/RPS13/MRPS21/RPL31/RPL10/RPS4Y1/RPS26/RPL19/RPL7A/RPS4X/MRPL32/RPL5/MRPL55/RPL36A/RPL15/MRPL57/RPL35A/MRPS22/RPL38/RPL21/MRPL24/UBA52/RPS27/MRPS7/RPLP2/RPS2/MRPL21…
GO_LARGE_RIBOSOMAL_SUBUNIT	GO_LARGE_RIBOSOMAL_SUBUNIT	116	-0.636435	-1.46757	0.0344828	1	1	16261	tags=86%, list=28%, signal=62%	MRPL3/MRPL10/MRPL9/MRPS30/MRPL20/MRPL45/NPM1/MRPL37/RPL37/RPL6/RPL22/MRPL44/RPL7/RBM3/MRPL17/RPL3/RPL11/MRPL49/MRPL16/MRPL39/RPL36AL/MRPL42/RPL4/MRPL23/MRPL47/RPL12/MRPL2/RPL23/MRPL48/RPL30/RPL31/RPL10/RPL19/RPL7A/MRPL32/RPL5/MRPL55/RPL36A/RPL15/MRPL57/RPL35A/RPL38/RPL21/MRPL24/UBA52/NDUFAB1/RPLP2/MRPL21/RPL10A/RPL26/RPL8/MRPS18A/MRPL51/MPV17L2/MRPL41/MRPL1/RPL37A/RPL34/RPL14/MRPL27/MRPL33/RPL26L…
GO_MITOCHONDRIAL_LARGE_RIBOSOMAL_SUBUNIT	GO_MITOCHONDRIAL_LARGE_RIBOSOMAL_SUBUNIT	56	-0.624052	-1.37346	0.0344828	1	1	16884	tags=86%, list=29%, signal=61%	MRPL50/MRPL30/MRPL18/MRPL3/MRPL10/MRPL9/MRPS30/MRPL20/MRPL45/MRPL37/MRPL44/MRPL17/MRPL49/MRPL16/MRPL39/MRPL42/MRPL23/MRPL47/MRPL2/MRPL48/MRPL32/MRPL55/MRPL57/MRPL24/NDUFAB1/MRPL21/MRPS18A/MRPL51/MPV17L2/MRPL41/MRPL27/MRPL33/MALSU1/MRPL15/MRPL11/MRPL38/MRPL43/MRPL22/MRPL34/MRPL40/MRPL14/MRPL4/MRPL36/MRPL12/MRPL13/MRPL54/MRPL46/MRPL52
GO_NEGATIVE_REGULATION_OF_CATION_CHANNEL_ACTIVITY	GO_NEGATIVE_REGULATION_OF_CATION_CHANNEL_ACTIVITY	54	-0.702698	-1.51515	0.0344828	1	1	3697	tags=13%, list=6%, signal=12%	OR56A5/OR5T1/OR13F1/MIR212/OR56A4/MIR133A2/MIR1-1
GO_SMALL_RIBOSOMAL_SUBUNIT	GO_SMALL_RIBOSOMAL_SUBUNIT	71	-0.681275	-1.543	0.0344828	1	1	15933	tags=86%, list=27%, signal=63%	MRPS27/NPM1/MRPS6/MRPS2/MRPS18B/RPS24/MRPS14/MRPS33/MRPS18C/RPS6/MRPL42/RPS23/MRPS34/RPS25/RPS12/RPS20/RPS13/MRPS21/RPS4Y1/RPS26/RPS4X/MRPS22/UBA52/RPS27/MRPS7/RPS2/MRPS35/RPS27A/MRPS18A/RPS11/RPS3/MRPS36/EIF2D/MRPS24/MRPS26/HBA1/RPS8/RPS28/RPS14/MRPS17/MRPS11/RPS17/RPS9/RPS15/RPS7/MRPS15/HBA2/RPS10/RPS19/RPS21/RPS18/MRPS28/RPS3A/RPS16/RPSA/RPS15A/RPS5/RPS27L/RPS29/MRPS12/RPS4Y2
GO_INTERMEDIATE_FILAMENT_CYTOSKELETON	GO_INTERMEDIATE_FILAMENT_CYTOSKELETON	237	0.578856	1.34818	0.0352941	1	1	6362	tags=26%, list=11%, signal=23%	KRTAP22-2/KRTAP1-4/KRTAP6-2/KRTAP10-8/KRTAP19-7/KRTAP12-3/KRTAP2-1/KRTAP12-1/KRTAP9-2/KRTAP12-2/KRTAP9-7/KRTAP9-8/KRTAP24-1/KRTAP17-1/KRTAP26-1/KRTAP10-2/KRTAP9-1/KRTAP3-3/KRT31/KRTAP19-8/KRTAP27-1/KRTAP19-6/KRT13/KRTAP4-8/KRT33B/KRT222/KRT77/PADI6/KRTAP5-2/KRTAP29-1/KRT25/DLGAP2/KRT9/KRTAP21-1/KRTAP4-11/KRT6C/KRTAP10-5/KRTAP10-11/KRT4/KRT74/KRT33A/KRT28/KRTAP11-1/KRTAP19-1/KRTAP7-1/KRTAP10-9/KRT…
GO_SYNAPTIC_MEMBRANE	GO_SYNAPTIC_MEMBRANE	429	0.539074	1.32808	0.0352941	1	1	15983	tags=36%, list=27%, signal=27%	HTR3B/SLC6A5/CDH9/OPRM1/SCN10A/GABRA6/CPLX3/CACNG2/HTR5A/DLGAP2/UNC13C/CHRNA2/GABRG3/GRM5/GRIN2B/GLRA1/CACNG3/KCNJ3/DRD1/KCNC2/CHRM2/GABRG1/GRIP1/GRM1/GABRB2/GABRA4/GABRA5/HTR3A/GABRG2/SLC1A6/RIMS1/GRIN3A/GRIN2A/DRD3/GLRA3/SHANK2/GABRA1/GRM2/GRIN1/GRM7/CDH8/IQSEC3/HTR2A/GAD2/RIMS2/KCNA3/SHANK1/LRRC7/CHRM1/LRFN2/KCTD16/CHRNB3/CNTN5/PRKCG/CHRNA3/KCNH1/GABRB3/KCNA1/CBLN1/GABRA2/MUSK/LRFN5/DLGAP3/GAB…
GO_CYTOSOLIC_LARGE_RIBOSOMAL_SUBUNIT	GO_CYTOSOLIC_LARGE_RIBOSOMAL_SUBUNIT	57	-0.653134	-1.41946	0.0357143	1	1	15770	tags=91%, list=27%, signal=67%	RPL37/RPL6/RPL22/RPL7/RPL3/RPL11/RPL36AL/RPL4/RPL12/RPL23/RPL30/RPL31/RPL10/RPL19/RPL7A/RPL5/RPL36A/RPL15/RPL35A/RPL38/RPL21/UBA52/RPLP2/RPL10A/RPL26/RPL8/RPL37A/RPL34/RPL14/RPL26L1/RPL13A/RPL35/RPL23A/RPLP1/RPL13/RPL24/RPL27A/RPL32/RPL29/RPLP0/RPL27/RPL28/RPL41/RPL9/RPL17/RPL18/RSL24D1/RPL36/RPL39/RPL18A/RPLP0P6/RPL39P5
GO_NEGATIVE_REGULATION_OF_CALCIUM_ION_TRANSMEMBRANE_TRANSPORT	GO_NEGATIVE_REGULATION_OF_CALCIUM_ION_TRANSMEMBRANE_TRANSPORT	45	-0.743562	-1.53348	0.0357143	1	1	3697	tags=13%, list=6%, signal=12%	OR56A5/OR5T1/OR13F1/OR56A4/MIR133A2/MIR1-1
GO_NEGATIVE_REGULATION_OF_MUSCLE_HYPERTROPHY	GO_NEGATIVE_REGULATION_OF_MUSCLE_HYPERTROPHY	38	-0.786849	-1.58132	0.0357143	1	1	523	tags=8%, list=1%, signal=8%	GLRX3/MIR133A2/MIR1-1
GO_NEGATIVE_REGULATION_OF_PROTEIN_KINASE_B_SIGNALING	GO_NEGATIVE_REGULATION_OF_PROTEIN_KINASE_B_SIGNALING	59	-0.619983	-1.36291	0.0357143	1	1	599	tags=5%, list=1%, signal=5%	TRIB3/MIR375/MIR449A
GO_CATION_CHANNEL_ACTIVITY	GO_CATION_CHANNEL_ACTIVITY	322	0.553554	1.32958	0.0365854	1	1	16701	tags=45%, list=29%, signal=33%	HTR3B/KCNK18/CNGB1/KCNB2/OPRM1/SCN10A/KCNV1/CACNG2/KCNK16/CHRNA2/RYR2/KCNS2/CALHM1/KCNG3/GRIN2B/TRPC5/CACNA1B/HCN1/CACNG3/KCNA4/TRPV6/KCNJ3/KCNC2/CACNA1S/TRPA1/CACNA1I/P2RX2/HTR3A/KCNT1/KCNH7/GRIN3A/GRIN2A/LRRC52/HCN4/GRIN1/KCNA3/KCNK12/KCNS1/LRRC38/KCNH5/KCNJ1/OTOP1/CACNA1E/CHRNB3/KCNK4/KCNJ12/KCNA5/JPH3/KCNH6/CHRNA3/KCNH1/KCNA1/CACNA2D3/KCNK9/CACNA1F/SCN9A/TMC2/P2RX1/HTR1B/IL1RAPL1/SCN3B/KCNK1/…
GO_PRODUCTION_OF_MOLECULAR_MEDIATOR_OF_IMMUNE_RESPONSE	GO_PRODUCTION_OF_MOLECULAR_MEDIATOR_OF_IMMUNE_RESPONSE	291	0.562864	1.32871	0.0365854	1	1	18251	tags=44%, list=31%, signal=30%	IGLV3-32/PMS2P6/TRAV9-1/IGLV3-22/IGKV1-37/KLK7/KLK5/TRAV18/IGLV11-55/IL2/IGKV1-12/IFNA2/TRDV1/IGLV9-49/IGKV2D-26/IGLV3-12/IGKV1D-12/IGLV3-16/IGKV6D-21/IGKV1-13/IL12B/IGLV5-37/IGKV1D-33/TRDV2/KIR2DL4/IGKV3-7/IGLV3-9/IGKV2D-29/FCRL3/IGKV2-28/IGKV3D-11/TRAV14DV4/CHGA/IGLV4-3/TRAV19/IGKV3D-20/IGLV3-1/IGKV3D-7/IGKV2-29/IGKV1-9/TRAV9-2/IGLV6-57/IGKV6-21/IGKV1-17/CD40LG/IGKV1-8/CCR6/TRAV40/GCNT3/IGKV1-1…
GO_G_PROTEIN_COUPLED_RECEPTOR_SIGNALING_PATHWAY_INVOLVED_IN_HEART_PROCESS	GO_G_PROTEIN_COUPLED_RECEPTOR_SIGNALING_PATHWAY_INVOLVED_IN_HEART_PROCESS	15	-0.858793	-1.39372	0.037037	1	1	1536	tags=20%, list=3%, signal=19%	MIR30E/MIR133A2/MIR1-1
GO_NEGATIVE_REGULATION_OF_PHOSPHATIDYLINOSITOL_3_KINASE_SIGNALING	GO_NEGATIVE_REGULATION_OF_PHOSPHATIDYLINOSITOL_3_KINASE_SIGNALING	15	-0.919347	-1.49199	0.037037	1	1	176	tags=13%, list=0%, signal=13%	CRYBA1/MIR449A
GO_REGULATION_OF_SKELETAL_MUSCLE_ADAPTATION	GO_REGULATION_OF_SKELETAL_MUSCLE_ADAPTATION	16	-0.859527	-1.4078	0.037037	1	1	49	tags=12%, list=0%, signal=12%	TNNC1/MIR208B
GO_KERATINIZATION	GO_KERATINIZATION	224	0.594344	1.34289	0.0375	1	1	6472	tags=32%, list=11%, signal=28%	KRTAP1-4/KRTAP6-2/KRTAP10-8/KRTAP19-7/LCE3B/KRTAP12-3/KRTAP2-1/KRTAP12-1/LCE3E/KRTAP9-2/KRTAP12-2/KRTAP9-7/KRTAP9-8/KRTAP24-1/SPRR2F/SPRR2E/SPRR2A/KRTAP17-1/KRTAP26-1/KRTAP10-2/SPRR1B/KRTAP9-1/KRTAP3-3/SPRR3/KRT31/LCE1F/KRTAP19-8/LCE2A/KRTAP27-1/KLK5/KRTAP19-6/KRT13/KRTAP4-8/KRT33B/KRT77/KRTAP5-2/KRTAP29-1/LCE3A/KRT25/SPRR2G/KRT9/KRTAP21-1/KRTAP4-11/KRT6C/KRTAP10-5/KRTAP10-11/KRT4/SPRR1A/KRT74/KR…
GO_NEGATIVE_REGULATION_OF_SMOOTH_MUSCLE_CELL_MIGRATION	GO_NEGATIVE_REGULATION_OF_SMOOTH_MUSCLE_CELL_MIGRATION	36	0.785691	1.44663	0.0410959	1	1	2131	tags=11%, list=4%, signal=11%	MIR424/MIR15A/MIR218-2/MIR182
GO_RIBOSOMAL_SUBUNIT	GO_RIBOSOMAL_SUBUNIT	183	-0.651624	-1.55244	0.0416667	1	1	16261	tags=86%, list=28%, signal=62%	MRPL3/MRPL10/MRPL9/MRPS30/MRPS27/MRPL20/MRPL45/NPM1/MRPL37/RPL37/MRPS6/RPL6/RPL22/MRPS2/MRPL44/RPL7/MRPS18B/RBM3/RPS24/MRPS14/MRPL17/RPL3/RPL11/MRPS33/MRPL49/MRPL16/MRPL39/MRPS18C/RPL36AL/RPS6/MRPL42/RPS23/RPL4/MRPL23/MRPS34/MRPL47/RPS25/RPL12/MRPL2/RPL23/MRPL48/RPL30/RPS12/RPS20/RPS13/MRPS21/RPL31/RPL10/RPS4Y1/RPS26/RPL19/RPL7A/RPS4X/MRPL32/RPL5/MRPL55/RPL36A/RPL15/MRPL57/RPL35A/MRPS22/RPL38/RPL…
GO_U2_SNRNP	GO_U2_SNRNP	21	0.849633	1.46212	0.0416667	1	1	1660	tags=5%, list=3%, signal=5%	RBMY1E
GO_RIBOSOME	GO_RIBOSOME	224	-0.530847	-1.33716	0.0454545	1	1	16261	tags=77%, list=28%, signal=56%	MRPL3/MRPL10/MRPL9/MRPS30/PTCD3/MRPS27/MRPL20/MRPL45/NPM1/MRPL37/RPL37/MRPS6/RPL6/RPL22/MRPS2/MRPL44/RPL7/MRPS18B/RBM3/RPS24/MRPS14/APEX1/MRPL17/RPL3/RPL11/MRPS33/MRPL49/MRPL16/MRPL39/MRPS18C/RPL36AL/RPS6/MRPL42/AURKAIP1/RPS23/RPL4/MRPL23/MRPS34/MRPL47/RPS25/RPL12/MRPL2/RPL23/MRPL48/RPL30/RPS12/RPS20/MTG1/RPS13/MRPS21/BTF3/RPL31/RPL10/RPS4Y1/RPS26/RPL19/RPL7A/RPS4X/MRPL32/RPL5/MRPL55/RPL36A/RPL15…
GO_IMMUNE_RESPONSE_REGULATING_CELL_SURFACE_RECEPTOR_SIGNALING_PATHWAY	GO_IMMUNE_RESPONSE_REGULATING_CELL_SURFACE_RECEPTOR_SIGNALING_PATHWAY	487	0.505433	1.25904	0.0470588	1	1	17094	tags=34%, list=29%, signal=25%	GPR32P1/IGHV1OR15-1/MUC15/CR2/IGHV3-38/IGKV1-12/IGHV3-35/IGHV7-81/GPR33/IGLC6/IGHV2-26/CLEC6A/IGHV4-28/MUC2/IGKV1D-12/IGHV1-3/MS4A1/TRAV8-4/IGHV4-31/IGHV4-4/TESPA1/IGHV3-66/IGHV3-72/IGHV2-5/PAX5/MUC7/BLK/IGKV1D-33/IGHV3-53/IGHV2-70/IGHV3-48/IGHV3-73/IGHV3-7/IGHV1-58/TRAV29DV5/FCRL3/IGKV2-28/GCSAM/PAK3/IGKV3D-11/THEMIS/CR1/CTLA4/IGHV3-11/MUC21/IGHV3-21/HHLA2/IGHV3-64/IGHV6-1/TRAV19/IGLC7/IGKV3D-20…
GO_REGULATION_OF_CELLULAR_AMIDE_METABOLIC_PROCESS	GO_REGULATION_OF_CELLULAR_AMIDE_METABOLIC_PROCESS	469	0.505669	1.25625	0.047619	1	1	3781	tags=4%, list=6%, signal=4%	MIR106A/MIR31/MIR365B/MIR208A/MIR107/MIR133B/MIR15A/ZCCHC13/MIR181A2/PIWIL1/MIR218-2/MIR182/MIR100/EIF4E1B/MIR101-2/DAZL/PADI6/PRG3/GRM5/MIR138-2

## Sheet: PAK4
ID	Description	setSize	enrichmentScore	NES	pvalue	p.adjust	qvalues	rank	leading_edge	core_enrichment
GO_ADAPTIVE_IMMUNE_RESPONSE_BASED_ON_SOMATIC_RECOMBINATION_OF_IMMUNE_RECEPTORS_BUILT_FROM_IMMUNOGLOBULIN_SUPERFAMILY_DOMAINS	GO_ADAPTIVE_IMMUNE_RESPONSE_BASED_ON_SOMATIC_RECOMBINATION_OF_IMMUNE_RECEPTORS_BUILT_FROM_IMMUNOGLOBULIN_SUPERFAMILY_DOMAINS	341	-0.587887	-1.51682	0.0135135	1	1	8623	tags=30%, list=15%, signal=26%	CCL19/IL18R1/C4BPB/IL18RAP/IGHV4-4/IGLV1-51/IGHG2/XCL1/IGHA1/IGHG1/IGLV1-40/IGHV4-39/IGHV1-69/IGKV5-2/IGKC/IGLC2/IGHV1-24/IL12B/IGHV3-21/IGHV3-30/IGLV1-47/IGLV3-21/IL10/CR1/IGKV3-20/IGHV7-81/IGHG3/IGHV3-11/IGLC3/IGLC6/IGKV3-15/IGHV3-53/IGLV1-44/IGHV2-70/IGKV1D-39/IGLV3-1/IGHV3-48/CLEC4G/IGHA2/IGLV3-25/IGHV2-26/IGLV2-14/IGLV3-19/CLC/IGHV3-74/IGHV1-18/IGKV4-1/IGHV3-23/IGHV3-49/IGHV5-51/IFNA2/IGLC7/…
GO_LYMPHOCYTE_MEDIATED_IMMUNITY	GO_LYMPHOCYTE_MEDIATED_IMMUNITY	340	-0.584631	-1.51108	0.0135135	1	1	8444	tags=31%, list=14%, signal=27%	IL18R1/C4BPB/IL18RAP/IGHV4-4/IGLV1-51/IGHG2/XCL1/IGHA1/IGHG1/IGLV1-40/CLEC12B/IGHV4-39/IGHV1-69/IGKV5-2/IGKC/IGLC2/IGHV1-24/IL12B/CRTAM/IGHV3-21/IGHV3-30/IGLV1-47/IGLV3-21/IL10/CR1/IGKV3-20/IGHV7-81/IGHG3/IGHV3-11/IGLC3/IGLC6/IGKV3-15/IGHV3-53/IGLV1-44/IGHV2-70/IGKV1D-39/IGLV3-1/IGHV3-48/CLEC4G/LEP/IGHA2/IGLV3-25/IGHV2-26/IGLV2-14/IGLV3-19/CLC/IGHV3-74/IGHV1-18/IGKV4-1/IGHV3-23/IGHV3-49/IGHV5-51/…
GO_IMMUNE_RESPONSE_REGULATING_CELL_SURFACE_RECEPTOR_SIGNALING_PATHWAY	GO_IMMUNE_RESPONSE_REGULATING_CELL_SURFACE_RECEPTOR_SIGNALING_PATHWAY	487	-0.52085	-1.36469	0.0138889	1	1	11452	tags=26%, list=20%, signal=21%	CLEC4E/CD3D/CD226/TRBV7-9/LAX1/LILRA4/TEC/PTPN22/CACNA1F/CLEC6A/MOG/MUCL1/CD28/MUC2/CD22/FCGR1B/TRAV29DV5/IGHM/STAP1/FCGR2B/FFAR2/SKAP1/MUC5AC/TRAV19/C5AR2/TRAT1/FPR2/IGHV4-4/IGLV1-51/CD200R1/IGHG2/IGHA1/IGHG1/TESPA1/IGLV1-40/CLEC12B/IGHV4-39/IGHV1-69/IGKV5-2/HHLA2/IGKC/IGLC2/IGHV1-24/THEMIS/PSMA8/IGHV3-21/IGHV3-30/IGLV1-47/IGLV3-21/CR1/IGKV3-20/MS4A1/IGHV7-81/IGHG3/IGHV3-11/IGLC3/IGLC6/IGKV3-15/…
GO_PHAGOCYTOSIS	GO_PHAGOCYTOSIS	351	-0.586095	-1.51387	0.0142857	1	1	8468	tags=30%, list=15%, signal=26%	IGHM/STAP1/FCGR2B/FCN2/LBP/IL15/FPR2/C4BPB/IGHV4-4/IGLV1-51/MARCO/IGHG2/IGHA1/IGHG1/IGLV1-40/IGHV4-39/IGHV1-69/IGKV5-2/IGKC/IGLC2/IGHV1-24/IGHV3-21/IGHV3-30/IGLV1-47/IGLV3-21/ANXA3/IGKV3-20/CEBPE/IGHV7-81/IGHG3/IGHV3-11/IGLC3/IGLC6/IGKV3-15/IGHV3-53/IGLV1-44/IGHV2-70/IGKV1D-39/IGLV3-1/MIR181B1/IGHV3-48/LEP/IGHA2/IGLV3-25/SFTPA1/IGHV2-26/IGLV2-14/IGLV3-19/IFNG/IGHV3-74/IGHV1-18/IGKV4-1/IGHV3-23/IG…
GO_PRODUCTION_OF_MOLECULAR_MEDIATOR_OF_IMMUNE_RESPONSE	GO_PRODUCTION_OF_MOLECULAR_MEDIATOR_OF_IMMUNE_RESPONSE	291	-0.590352	-1.5034	0.0142857	1	1	8253	tags=31%, list=14%, signal=27%	IL18RAP/IGLV1-51/TMIGD2/XCL1/MZB1/IGLV1-40/IGKV5-2/CD244/IGKC/IL12B/IGLV8-61/IGLV1-47/IGLV3-21/IL10/IGKV2D-24/IGKV3-20/IGKV3-15/IGLV1-44/IGKV1D-39/IGLV3-1/IGLV3-25/IGLV2-14/IGLV3-19/CLC/IGKV2-24/IGLV3-9/IGKV4-1/IFNA2/IGLV4-69/IGKV1-39/IGLV5-48/IGLV3-27/IGKV1-8/IGLV9-49/TRDV1/IGKV1-5/IGLV1-36/IGLV3-10/IGLV2-33/KLK7/IGLV2-23/IGLV2-11/IGKV1-9/IGKV1-37/IGKV1-6/IGLV6-57/IGKV1-12/IGLV7-46/IGLV3-16/IGKV…
GO_TISSUE_MIGRATION	GO_TISSUE_MIGRATION	351	-0.520698	-1.34495	0.0142857	1	1	4760	tags=6%, list=8%, signal=6%	MIR101-1/BMP10/APOH/MIR200B/FGF16/MIR640/MIR483/MIR150/MIR494/FGFBP1/MIR19B2/AGTR2/MIR196A1/MIR329-1/MIR133B/MIR424/MIR129-1/MIR31/MIR495/MIRLET7F2/MIR487B/MIR505
GO_B_CELL_MEDIATED_IMMUNITY	GO_B_CELL_MEDIATED_IMMUNITY	208	-0.696682	-1.70336	0.0151515	1	1	8290	tags=46%, list=14%, signal=39%	C4BPB/IGHV4-4/IGLV1-51/IGHG2/XCL1/IGHA1/IGHG1/IGLV1-40/IGHV4-39/IGHV1-69/IGKV5-2/IGKC/IGLC2/IGHV1-24/IGHV3-21/IGHV3-30/IGLV1-47/IGLV3-21/IL10/CR1/IGKV3-20/IGHV7-81/IGHG3/IGHV3-11/IGLC3/IGLC6/IGKV3-15/IGHV3-53/IGLV1-44/IGHV2-70/IGKV1D-39/IGLV3-1/IGHV3-48/IGHA2/IGLV3-25/IGHV2-26/IGLV2-14/IGLV3-19/IGHV3-74/IGHV1-18/IGKV4-1/IGHV3-23/IGHV3-49/IGHV5-51/IGLC7/IGKV1-39/IGHV3-15/IGLV3-27/IGHV4-34/IGHV3-73…
GO_HUMORAL_IMMUNE_RESPONSE_MEDIATED_BY_CIRCULATING_IMMUNOGLOBULIN	GO_HUMORAL_IMMUNE_RESPONSE_MEDIATED_BY_CIRCULATING_IMMUNOGLOBULIN	141	-0.765239	-1.75704	0.0151515	1	1	8290	tags=66%, list=14%, signal=57%	C4BPB/IGHV4-4/IGLV1-51/IGHG2/IGHA1/IGHG1/IGLV1-40/IGHV4-39/IGHV1-69/IGKV5-2/IGKC/IGLC2/IGHV1-24/IGHV3-21/IGHV3-30/IGLV1-47/IGLV3-21/CR1/IGKV3-20/IGHV7-81/IGHG3/IGHV3-11/IGLC3/IGLC6/IGKV3-15/IGHV3-53/IGLV1-44/IGHV2-70/IGKV1D-39/IGLV3-1/IGHV3-48/IGHA2/IGLV3-25/IGHV2-26/IGLV2-14/IGLV3-19/IGHV3-74/IGHV1-18/IGKV4-1/IGHV3-23/IGHV3-49/IGHV5-51/IGLC7/IGKV1-39/IGHV3-15/IGLV3-27/IGHV4-34/IGHV3-73/IGHV4-31/…
GO_IMMUNOGLOBULIN_COMPLEX	GO_IMMUNOGLOBULIN_COMPLEX	137	-0.732477	-1.66401	0.0151515	1	1	7498	tags=83%, list=13%, signal=73%	IGHA1/IGHG1/IGLV1-40/IGHV4-39/IGHV1-69/IGKV5-2/IGKC/IGLC2/IGHV1-24/IGHV3-21/IGLV8-61/IGHV3-30/IGLV1-47/IGLV3-21/IGKV3-20/IGHV7-81/IGHG3/IGHV3-11/IGLC3/IGLC6/IGKV3-15/IGHV3-53/IGLV1-44/IGHV2-70/IGKV1D-39/IGLV3-1/IGHV3-48/IGHA2/IGLV3-25/IGHV2-26/IGLV2-14/IGLV3-19/IGKV2-24/IGHV3-74/IGHV1-18/IGLV3-9/IGKV4-1/IGHV3-23/IGHV3-49/IGHV5-51/IGLC7/IGLV4-69/IGKV1-39/IGHV3-15/IGLV3-27/IGHV4-34/IGKV1-8/IGHV3-73…
GO_MEMBRANE_INVAGINATION	GO_MEMBRANE_INVAGINATION	127	-0.646348	-1.44822	0.0151515	1	1	8150	tags=41%, list=14%, signal=35%	IGHV4-4/MARCO/IGHG2/IGHA1/IGHG1/IGHV4-39/IGHV1-69/IGKC/IGLC2/IGHV1-24/IGHV3-21/IGHV3-30/IGHV7-81/IGHG3/IGHV3-11/IGLC3/IGLC6/IGHV3-53/IGHV2-70/IGHV3-48/IGHA2/IGHV2-26/IGHV3-74/IGHV1-18/IGHV3-23/IGHV3-49/IGHV5-51/IGLC7/IGHV3-15/IGHV4-34/IGHV3-73/IGHV4-31/IGHV1-69-2/IGHV3-33/IGHV3-16/IGHV4-59/IGHV3-7/IGHV3-66/IGHV6-1/IGLL5/IGHV3-43/IGHV4-61/IGHV1-45/IGHV4-28/IGHV1-58/IGHD/IGHV3-64/IGHV3-13/IGHV1-3/I…
GO_FC_RECEPTOR_MEDIATED_STIMULATORY_SIGNALING_PATHWAY	GO_FC_RECEPTOR_MEDIATED_STIMULATORY_SIGNALING_PATHWAY	142	-0.692989	-1.58007	0.0153846	1	1	8144	tags=40%, list=14%, signal=35%	IGLV1-51/IGHG2/IGHG1/IGLV1-40/IGHV4-39/IGHV1-69/IGKV5-2/IGKC/IGLC2/IGHV3-30/IGLV1-47/IGLV3-21/IGKV3-20/IGHG3/IGHV3-11/IGLC3/IGLC6/IGKV3-15/IGHV3-53/IGLV1-44/IGHV2-70/IGKV1D-39/IGLV3-1/IGHV3-48/IGLV3-25/IGLV2-14/IGLV3-19/IGKV4-1/IGHV3-23/IGLC7/IGKV1-39/IGLV3-27/IGHV4-34/IGHV3-33/IGHV4-59/IGKV1-5/IGHV3-7/IGLV2-23/IGLV2-11/MYH2/IGLV6-57/IGKV1-12/IGKV1-16/IGKV1-17/IGKV2-28/IGKV3D-20/IGLV2-8/IGKV1D-33…
GO_IMMUNOGLOBULIN_PRODUCTION	GO_IMMUNOGLOBULIN_PRODUCTION	197	-0.645461	-1.56278	0.0153846	1	1	7913	tags=41%, list=14%, signal=36%	TMIGD2/XCL1/MZB1/IGLV1-40/IGKV5-2/IGKC/IGLV8-61/IGLV1-47/IGLV3-21/IL10/IGKV2D-24/IGKV3-20/IGKV3-15/IGLV1-44/IGKV1D-39/IGLV3-1/IGLV3-25/IGLV2-14/IGLV3-19/IGKV2-24/IGLV3-9/IGKV4-1/IGLV4-69/IGKV1-39/IGLV5-48/IGLV3-27/IGKV1-8/IGLV9-49/TRDV1/IGKV1-5/IGLV1-36/IGLV3-10/IGLV2-33/IGLV2-23/IGLV2-11/IGKV1-9/IGKV1-37/IGKV1-6/IGLV6-57/IGKV1-12/IGLV7-46/IGLV3-16/IGKV1-16/IGKV1-17/IGKV3-7/IGKV2-28/IGKV3D-20/IGK…
GO_ANTIGEN_BINDING	GO_ANTIGEN_BINDING	146	-0.694609	-1.58167	0.015625	1	1	8150	tags=55%, list=14%, signal=48%	IGHV4-4/IGLV1-51/IGHG2/IGHA1/IGHG1/IGLV1-40/IGHV4-39/IGHV1-69/IGKV5-2/IGKC/IGLC2/IGHV1-24/IGHV3-21/IGHV3-30/IGLV1-47/IGLV3-21/IGKV3-20/IGHV7-81/IGHG3/IGHV3-11/IGLC3/IGLC6/IGKV3-15/IGHV3-53/IGLV1-44/IGHV2-70/IGKV1D-39/IGLV3-1/IGHV3-48/IGHA2/IGLV3-25/IGHV2-26/IGLV2-14/IGLV3-19/IGHV3-74/IGHV1-18/IGKV4-1/IGHV3-23/IGHV3-49/IGHV5-51/IGLC7/IGKV1-39/IGHV3-15/IGLV3-27/IGHV4-34/IGHV3-73/IGHV4-31/IGHV1-69-2…
GO_POSITIVE_REGULATION_OF_B_CELL_ACTIVATION	GO_POSITIVE_REGULATION_OF_B_CELL_ACTIVATION	131	-0.61756	-1.37741	0.015873	1	1	8150	tags=39%, list=14%, signal=34%	IGHV4-4/IGHG2/IGHA1/IGHG1/IGHV4-39/IGHV1-69/IGKC/IGLC2/IGHV1-24/IGHV3-21/IGHV3-30/IGHV7-81/IGHG3/IGHV3-11/IGLC3/IGLC6/IGHV3-53/IGHV2-70/IGHV3-48/IGHA2/IGHV2-26/IGHV3-74/IGHV1-18/IGHV3-23/IGHV3-49/IGHV5-51/IGLC7/IGHV3-15/IGHV4-34/IGHV3-73/IGHV4-31/IGHV1-69-2/IGHV3-33/IGHV3-16/IGHV4-59/IGHV3-7/IGHV3-66/IGHV6-1/IGLL5/IGHV3-43/IGHV4-61/IGHV1-45/IGHV4-28/IGHV1-58/IGHD/IGHV3-64/IGHV3-13/IGHV1-3/IGHV3-3…
GO_IMMUNOGLOBULIN_RECEPTOR_BINDING	GO_IMMUNOGLOBULIN_RECEPTOR_BINDING	66	-0.762335	-1.58612	0.016129	1	1	8150	tags=79%, list=14%, signal=68%	IGHV4-4/IGHG2/IGHA1/IGHG1/IGHV4-39/IGHV1-69/IGKC/IGLC2/IGHV1-24/IGHV3-21/IGHV3-30/IGHV7-81/IGHG3/IGHV3-11/IGLC3/IGLC6/IGHV3-53/CLEC4D/IGHV2-70/IGHV3-48/IGHA2/IGHV2-26/IGHV3-74/IGHV1-18/IGHV3-23/IGHV3-49/IGHV5-51/IGLC7/IGHV3-15/IGHV4-34/IGHV3-73/IGHV4-31/IGHV1-69-2/IGHV3-33/IGHV3-16/IGHV4-59/IGHV3-7/IGHV3-66/IGHV6-1/IGLL5/IGHV3-43/IGHV4-61/IGHV1-45/IGHV4-28/IGHV1-58/IGHD/IGHV3-64/IGHV3-13/IGHV1-3/…
GO_POSITIVE_REGULATION_OF_BLOOD_VESSEL_ENDOTHELIAL_CELL_MIGRATION	GO_POSITIVE_REGULATION_OF_BLOOD_VESSEL_ENDOTHELIAL_CELL_MIGRATION	76	-0.711656	-1.50051	0.016129	1	1	3352	tags=8%, list=6%, signal=7%	MIR101-1/MIR150/FGFBP1/MIR31/MIRLET7F2/MIR487B
GO_BLOOD_VESSEL_ENDOTHELIAL_CELL_MIGRATION	GO_BLOOD_VESSEL_ENDOTHELIAL_CELL_MIGRATION	174	-0.605732	-1.41469	0.0163934	1	1	3760	tags=10%, list=6%, signal=9%	MIR640/MIR483/MIR150/MIR494/FGFBP1/MIR19B2/AGTR2/MIR196A1/MIR329-1/MIR133B/MIR424/MIR129-1/MIR31/MIR495/MIRLET7F2/MIR487B/MIR505
GO_FC_EPSILON_RECEPTOR_SIGNALING_PATHWAY	GO_FC_EPSILON_RECEPTOR_SIGNALING_PATHWAY	168	-0.672442	-1.55623	0.0163934	1	1	7370	tags=32%, list=13%, signal=28%	IGLV1-40/IGHV4-39/IGHV1-69/IGKV5-2/IGKC/IGLC2/PSMA8/IGHV3-30/IGLV1-47/IGLV3-21/IGKV3-20/IGHV3-11/IGLC3/IGLC6/IGKV3-15/IGHV3-53/IGLV1-44/IGHV2-70/IGKV1D-39/IGLV3-1/IGHV3-48/IGLV3-25/IGLV2-14/IGLV3-19/IGKV4-1/IGHV3-23/IGLC7/IGKV1-39/IGLV3-27/IGHV4-34/IGHV3-33/IGHV4-59/IGKV1-5/IGHV3-7/IGLV2-23/IGLV2-11/IGLV6-57/IGKV1-12/IGKV1-16/IGKV1-17/IGKV2-28/IGKV3D-20/IGLV2-8/IGKV1D-33/IGKV1D-12/IGKV2D-28/IGLV7…
GO_PHAGOCYTOSIS_RECOGNITION	GO_PHAGOCYTOSIS_RECOGNITION	74	-0.726287	-1.52748	0.0163934	1	1	8150	tags=69%, list=14%, signal=59%	IGHV4-4/IGHG2/IGHA1/IGHG1/IGHV4-39/IGHV1-69/IGKC/IGLC2/IGHV1-24/IGHV3-21/IGHV3-30/IGHV7-81/IGHG3/IGHV3-11/IGLC3/IGLC6/IGHV3-53/IGHV2-70/IGHV3-48/IGHA2/IGHV2-26/IGHV3-74/IGHV1-18/IGHV3-23/IGHV3-49/IGHV5-51/IGLC7/IGHV3-15/IGHV4-34/IGHV3-73/IGHV4-31/IGHV1-69-2/IGHV3-33/IGHV3-16/IGHV4-59/IGHV3-7/IGHV3-66/IGHV6-1/IGLL5/IGHV3-43/IGHV4-61/IGHV1-45/IGHV4-28/IGHV1-58/IGHD/IGHV3-64/IGHV3-13/IGHV1-3/IGHV3-3…
GO_COMPLEMENT_ACTIVATION	GO_COMPLEMENT_ACTIVATION	164	-0.696471	-1.59663	0.0166667	1	1	8290	tags=58%, list=14%, signal=50%	C4BPB/IGHV4-4/IGLV1-51/IGHG2/IGHA1/IGHG1/IGLV1-40/IGHV4-39/IGHV1-69/IGKV5-2/IGKC/IGLC2/IGHV1-24/IGHV3-21/IGHV3-30/IGLV1-47/IGLV3-21/CR1/IGKV3-20/IGHV7-81/IGHG3/IGHV3-11/IGLC3/IGLC6/IGKV3-15/IGHV3-53/IGLV1-44/CD5L/IGHV2-70/IGKV1D-39/IGLV3-1/IGHV3-48/IGHA2/IGLV3-25/IGHV2-26/IGLV2-14/IGLV3-19/IGHV3-74/IGHV1-18/IGKV4-1/IGHV3-23/IGHV3-49/IGHV5-51/IGLC7/IGKV1-39/IGHV3-15/IGLV3-27/IGHV4-34/IGHV3-73/IGHV…
GO_IMMUNOGLOBULIN_COMPLEX_CIRCULATING	GO_IMMUNOGLOBULIN_COMPLEX_CIRCULATING	62	-0.772912	-1.60468	0.0166667	1	1	8150	tags=84%, list=14%, signal=72%	IGHV4-4/IGHG2/IGHA1/IGHG1/IGHV4-39/IGHV1-69/IGKC/IGLC2/IGHV1-24/IGHV3-21/IGHV3-30/IGKV3-20/IGHV7-81/IGHG3/IGHV3-11/IGLC3/IGLC6/IGHV3-53/IGHV2-70/IGHV3-48/IGHA2/IGHV2-26/IGHV3-74/IGHV1-18/IGHV3-23/IGHV3-49/IGHV5-51/IGLC7/IGHV3-15/IGHV4-34/IGHV3-73/IGHV4-31/IGHV1-69-2/IGHV3-33/IGHV3-16/IGHV4-59/IGHV3-7/IGHV3-66/IGHV6-1/IGLL5/IGHV3-43/IGHV4-61/IGHV1-45/IGHV4-28/IGHV1-58/IGHD/IGHV3-64/IGHV3-13/IGHV1-…
GO_POSITIVE_REGULATION_OF_CELL_AGING	GO_POSITIVE_REGULATION_OF_CELL_AGING	21	-0.883945	-1.55972	0.0169492	1	1	1705	tags=14%, list=3%, signal=14%	KIR2DL4/MIR20B/MIR217
GO_POSITIVE_REGULATION_OF_MUSCLE_ADAPTATION	GO_POSITIVE_REGULATION_OF_MUSCLE_ADAPTATION	15	-0.861444	-1.45817	0.0169492	1	1	386	tags=13%, list=1%, signal=13%	MIR34C/MIR208A
GO_IRON_SULFUR_CLUSTER_ASSEMBLY	GO_IRON_SULFUR_CLUSTER_ASSEMBLY	19	-0.882734	-1.5372	0.0172414	1	1	838	tags=11%, list=1%, signal=10%	BOLA2B/BOLA2
GO_POSITIVE_REGULATION_OF_VASCULAR_ENDOTHELIAL_GROWTH_FACTOR_RECEPTOR_SIGNALING_PATHWAY	GO_POSITIVE_REGULATION_OF_VASCULAR_ENDOTHELIAL_GROWTH_FACTOR_RECEPTOR_SIGNALING_PATHWAY	19	-0.859564	-1.49685	0.0172414	1	1	445	tags=16%, list=1%, signal=16%	PRKCB/IL1B/MIR1224
GO_ADENYLATE_CYCLASE_ACTIVATING_ADRENERGIC_RECEPTOR_SIGNALING_PATHWAY_INVOLVED_IN_HEART_PROCESS	GO_ADENYLATE_CYCLASE_ACTIVATING_ADRENERGIC_RECEPTOR_SIGNALING_PATHWAY_INVOLVED_IN_HEART_PROCESS	10	0.946381	1.66578	0.0196078	1	1	582	tags=20%, list=1%, signal=20%	MIR1-1/MIR133A2
GO_CALCIUM_ION_EXPORT	GO_CALCIUM_ION_EXPORT	10	0.909966	1.60168	0.0196078	1	1	406	tags=10%, list=1%, signal=10%	MIR1-1
GO_CARDIAC_VASCULAR_SMOOTH_MUSCLE_CELL_DIFFERENTIATION	GO_CARDIAC_VASCULAR_SMOOTH_MUSCLE_CELL_DIFFERENTIATION	10	0.890787	1.56792	0.0196078	1	1	406	tags=10%, list=1%, signal=10%	MIR1-1
GO_MEMBRANE_DISRUPTION_IN_OTHER_ORGANISM	GO_MEMBRANE_DISRUPTION_IN_OTHER_ORGANISM	11	0.888518	1.59273	0.0196078	1	1	1112	tags=18%, list=2%, signal=18%	DEFA1/DEFA1B
GO_NEGATIVE_REGULATION_OF_CAMP_DEPENDENT_PROTEIN_KINASE_ACTIVITY	GO_NEGATIVE_REGULATION_OF_CAMP_DEPENDENT_PROTEIN_KINASE_ACTIVITY	11	0.944243	1.69262	0.0196078	1	1	582	tags=9%, list=1%, signal=9%	MIR133A2
GO_POSITIVE_REGULATION_OF_CARDIAC_MUSCLE_ADAPTATION	GO_POSITIVE_REGULATION_OF_CARDIAC_MUSCLE_ADAPTATION	10	-0.909677	-1.47948	0.0196078	1	1	386	tags=20%, list=1%, signal=20%	MIR34C/MIR208A
GO_PROTEIN_MATURATION_BY_IRON_SULFUR_CLUSTER_TRANSFER	GO_PROTEIN_MATURATION_BY_IRON_SULFUR_CLUSTER_TRANSFER	11	-0.934114	-1.54831	0.0196078	1	1	838	tags=18%, list=1%, signal=18%	BOLA2B/BOLA2
GO_NEGATIVE_REGULATION_OF_ACTION_POTENTIAL	GO_NEGATIVE_REGULATION_OF_ACTION_POTENTIAL	12	0.909848	1.59921	0.0212766	1	1	582	tags=17%, list=1%, signal=17%	MIR1-1/MIR133A2
GO_REGULATION_OF_MEMBRANE_REPOLARIZATION_DURING_ACTION_POTENTIAL	GO_REGULATION_OF_MEMBRANE_REPOLARIZATION_DURING_ACTION_POTENTIAL	12	0.925769	1.62719	0.0212766	1	1	582	tags=17%, list=1%, signal=17%	MIR1-1/MIR133A2
GO_NEGATIVE_REGULATION_OF_DELAYED_RECTIFIER_POTASSIUM_CHANNEL_ACTIVITY	GO_NEGATIVE_REGULATION_OF_DELAYED_RECTIFIER_POTASSIUM_CHANNEL_ACTIVITY	13	0.914812	1.59302	0.0217391	1	1	582	tags=15%, list=1%, signal=15%	MIR1-1/MIR133A2
GO_REGULATION_OF_PROGRAMMED_NECROTIC_CELL_DEATH	GO_REGULATION_OF_PROGRAMMED_NECROTIC_CELL_DEATH	25	0.857052	1.6585	0.0217391	1	1	522	tags=8%, list=1%, signal=8%	MIR107/MIR485
GO_REGULATION_OF_CARDIAC_MUSCLE_CONTRACTION_BY_CALCIUM_ION_SIGNALING	GO_REGULATION_OF_CARDIAC_MUSCLE_CONTRACTION_BY_CALCIUM_ION_SIGNALING	28	0.840314	1.5936	0.0222222	1	1	582	tags=7%, list=1%, signal=7%	MIR1-1/MIR133A2
GO_VENTRICULAR_CARDIAC_MUSCLE_CELL_MEMBRANE_REPOLARIZATION	GO_VENTRICULAR_CARDIAC_MUSCLE_CELL_MEMBRANE_REPOLARIZATION	28	0.863825	1.63818	0.0222222	1	1	582	tags=7%, list=1%, signal=7%	MIR1-1/MIR133A2
GO_MEMBRANE_REPOLARIZATION_DURING_ACTION_POTENTIAL	GO_MEMBRANE_REPOLARIZATION_DURING_ACTION_POTENTIAL	29	0.859855	1.62514	0.0227273	1	1	582	tags=7%, list=1%, signal=7%	MIR1-1/MIR133A2
GO_NEGATIVE_REGULATION_OF_CYCLIN_DEPENDENT_PROTEIN_KINASE_ACTIVITY	GO_NEGATIVE_REGULATION_OF_CYCLIN_DEPENDENT_PROTEIN_KINASE_ACTIVITY	34	0.852796	1.6759	0.0227273	1	1	483	tags=6%, list=1%, signal=6%	MIR711/MIR15A
GO_POSITIVE_REGULATION_OF_ENDOTHELIAL_CELL_APOPTOTIC_PROCESS	GO_POSITIVE_REGULATION_OF_ENDOTHELIAL_CELL_APOPTOTIC_PROCESS	23	0.872921	1.61873	0.0227273	1	1	1435	tags=13%, list=2%, signal=13%	MIR15A/MIR375/MIR132
GO_POSITIVE_REGULATION_OF_EPITHELIAL_CELL_APOPTOTIC_PROCESS	GO_POSITIVE_REGULATION_OF_EPITHELIAL_CELL_APOPTOTIC_PROCESS	37	0.836679	1.65664	0.0227273	1	1	1435	tags=8%, list=2%, signal=8%	MIR15A/MIR375/MIR132
GO_REGULATION_OF_CARDIAC_MUSCLE_CELL_MEMBRANE_REPOLARIZATION	GO_REGULATION_OF_CARDIAC_MUSCLE_CELL_MEMBRANE_REPOLARIZATION	29	0.846483	1.59987	0.0227273	1	1	582	tags=7%, list=1%, signal=7%	MIR1-1/MIR133A2
GO_REGULATION_OF_CARDIAC_MUSCLE_CONTRACTION_BY_REGULATION_OF_THE_RELEASE_OF_SEQUESTERED_CALCIUM_ION	GO_REGULATION_OF_CARDIAC_MUSCLE_CONTRACTION_BY_REGULATION_OF_THE_RELEASE_OF_SEQUESTERED_CALCIUM_ION	23	0.888171	1.64701	0.0227273	1	1	582	tags=9%, list=1%, signal=9%	MIR1-1/MIR133A2
GO_REGULATION_OF_NECROTIC_CELL_DEATH	GO_REGULATION_OF_NECROTIC_CELL_DEATH	35	0.821177	1.60796	0.0227273	1	1	522	tags=6%, list=1%, signal=6%	MIR107/MIR485
GO_MEMBRANE_REPOLARIZATION_DURING_VENTRICULAR_CARDIAC_MUSCLE_CELL_ACTION_POTENTIAL	GO_MEMBRANE_REPOLARIZATION_DURING_VENTRICULAR_CARDIAC_MUSCLE_CELL_ACTION_POTENTIAL	17	0.910128	1.62522	0.0232558	1	1	582	tags=12%, list=1%, signal=12%	MIR1-1/MIR133A2
GO_NEGATIVE_REGULATION_OF_MUSCLE_HYPERTROPHY	GO_NEGATIVE_REGULATION_OF_MUSCLE_HYPERTROPHY	38	0.780495	1.53973	0.0232558	1	1	2851	tags=8%, list=5%, signal=8%	MIR1-1/MIR133A2/MIR199B
GO_NEGATIVE_REGULATION_OF_PHOSPHATIDYLINOSITOL_3_KINASE_SIGNALING	GO_NEGATIVE_REGULATION_OF_PHOSPHATIDYLINOSITOL_3_KINASE_SIGNALING	15	0.909361	1.57701	0.0232558	1	1	162	tags=7%, list=0%, signal=7%	MIR449A
GO_PROGRAMMED_NECROTIC_CELL_DEATH	GO_PROGRAMMED_NECROTIC_CELL_DEATH	48	0.779527	1.61018	0.0232558	1	1	522	tags=4%, list=1%, signal=4%	MIR107/MIR485
GO_REGULATION_OF_CONNECTIVE_TISSUE_REPLACEMENT	GO_REGULATION_OF_CONNECTIVE_TISSUE_REPLACEMENT	15	0.896962	1.55551	0.0232558	1	1	2049	tags=13%, list=4%, signal=13%	MIR15B/MIR16-2
GO_REGULATION_OF_DELAYED_RECTIFIER_POTASSIUM_CHANNEL_ACTIVITY	GO_REGULATION_OF_DELAYED_RECTIFIER_POTASSIUM_CHANNEL_ACTIVITY	21	0.865324	1.53361	0.0232558	1	1	582	tags=10%, list=1%, signal=9%	MIR1-1/MIR133A2
GO_REGULATION_OF_MEMBRANE_REPOLARIZATION	GO_REGULATION_OF_MEMBRANE_REPOLARIZATION	36	0.815337	1.60205	0.0232558	1	1	582	tags=6%, list=1%, signal=6%	MIR1-1/MIR133A2
GO_REGULATION_OF_VENTRICULAR_CARDIAC_MUSCLE_CELL_ACTION_POTENTIAL	GO_REGULATION_OF_VENTRICULAR_CARDIAC_MUSCLE_CELL_ACTION_POTENTIAL	18	0.87687	1.5858	0.0232558	1	1	582	tags=11%, list=1%, signal=11%	MIR1-1/MIR133A2
GO_RNA_POLYMERASE_CORE_ENZYME_BINDING	GO_RNA_POLYMERASE_CORE_ENZYME_BINDING	60	0.818886	1.7172	0.0232558	1	1	2049	tags=8%, list=4%, signal=8%	MIR584/MIR1-1/MIR375/MIR140/MIR16-2
GO_VENTRICULAR_CARDIAC_MUSCLE_CELL_ACTION_POTENTIAL	GO_VENTRICULAR_CARDIAC_MUSCLE_CELL_ACTION_POTENTIAL	36	0.789288	1.55086	0.0232558	1	1	582	tags=6%, list=1%, signal=6%	MIR1-1/MIR133A2
GO_CARDIAC_MUSCLE_CELL_MEMBRANE_REPOLARIZATION	GO_CARDIAC_MUSCLE_CELL_MEMBRANE_REPOLARIZATION	39	0.817969	1.61166	0.0238095	1	1	582	tags=5%, list=1%, signal=5%	MIR1-1/MIR133A2
GO_NEGATIVE_REGULATION_OF_I_KAPPAB_KINASE_NF_KAPPAB_SIGNALING	GO_NEGATIVE_REGULATION_OF_I_KAPPAB_KINASE_NF_KAPPAB_SIGNALING	49	0.787356	1.59466	0.0238095	1	1	3253	tags=8%, list=6%, signal=8%	MIR15B/MIR15A/MIR16-2/ADIPOQ
GO_MEMBRANE_REPOLARIZATION	GO_MEMBRANE_REPOLARIZATION	47	0.785893	1.57903	0.0243902	1	1	582	tags=4%, list=1%, signal=4%	MIR1-1/MIR133A2
GO_RNA_POLYMERASE_BINDING	GO_RNA_POLYMERASE_BINDING	75	0.796587	1.71861	0.0243902	1	1	2049	tags=7%, list=4%, signal=6%	MIR584/MIR1-1/MIR375/MIR140/MIR16-2
GO_BASAL_TRANSCRIPTION_MACHINERY_BINDING	GO_BASAL_TRANSCRIPTION_MACHINERY_BINDING	70	0.802241	1.70013	0.025641	1	1	2049	tags=7%, list=4%, signal=7%	MIR584/MIR1-1/MIR375/MIR140/MIR16-2
GO_MODIFICATION_BY_SYMBIONT_OF_HOST_MORPHOLOGY_OR_PHYSIOLOGY	GO_MODIFICATION_BY_SYMBIONT_OF_HOST_MORPHOLOGY_OR_PHYSIOLOGY	43	0.807886	1.59422	0.025641	1	1	1112	tags=5%, list=2%, signal=5%	DEFA1/DEFA1B
GO_NEGATIVE_REGULATION_OF_PROTEIN_SERINE_THREONINE_KINASE_ACTIVITY	GO_NEGATIVE_REGULATION_OF_PROTEIN_SERINE_THREONINE_KINASE_ACTIVITY	141	0.593064	1.40698	0.0277778	1	1	3797	tags=4%, list=7%, signal=4%	MIR711/MIR15A/MIR133A2/DEFB114/ADIPOQ/MIR92A2
GO_FC_RECEPTOR_SIGNALING_PATHWAY	GO_FC_RECEPTOR_SIGNALING_PATHWAY	239	-0.613096	-1.50411	0.030303	1	1	8144	tags=25%, list=14%, signal=22%	IGLV1-51/CD200R1/IGHG2/IGHG1/IGLV1-40/IGHV4-39/IGHV1-69/IGKV5-2/IGKC/IGLC2/PSMA8/IGHV3-30/IGLV1-47/IGLV3-21/IGKV3-20/IGHG3/IGHV3-11/IGLC3/IGLC6/IGKV3-15/IGHV3-53/IGLV1-44/CLEC4D/IGHV2-70/IGKV1D-39/IGLV3-1/IGHV3-48/IGLV3-25/IGLV2-14/IGLV3-19/IGKV4-1/IGHV3-23/IGLC7/IGKV1-39/IGLV3-27/IGHV4-34/IGHV3-33/IGHV4-59/IGKV1-5/IGHV3-7/IGLV2-23/IGLV2-11/MYH2/IGLV6-57/IGKV1-12/IGKV1-16/IGKV1-17/IGKV2-28/IGKV3D…
GO_POSITIVE_REGULATION_OF_ENDOTHELIAL_CELL_MIGRATION	GO_POSITIVE_REGULATION_OF_ENDOTHELIAL_CELL_MIGRATION	123	-0.611619	-1.35811	0.030303	1	1	4760	tags=6%, list=8%, signal=5%	MIR101-1/FGF16/MIR150/FGFBP1/MIR31/MIRLET7F2/MIR487B
GO_REGULATION_OF_HUMORAL_IMMUNE_RESPONSE	GO_REGULATION_OF_HUMORAL_IMMUNE_RESPONSE	132	-0.64202	-1.44091	0.03125	1	1	8290	tags=50%, list=14%, signal=43%	C4BPB/IGLV1-51/IGHG2/IGHG1/IGLV1-40/IGHV4-39/IGHV1-69/IGKV5-2/IGKC/IGLC2/IGHV3-30/IGLV1-47/IGLV3-21/CR1/IGKV3-20/IGHG3/IGHV3-11/IGLC3/IGLC6/IGKV3-15/IGHV3-53/IGLV1-44/CD5L/IGHV2-70/IGKV1D-39/IGLV3-1/IGHV3-48/IGLV3-25/IGLV2-14/IGLV3-19/IGKV4-1/IGHV3-23/IGLC7/IGKV1-39/IGLV3-27/IGHV4-34/IGHV3-33/C4BPA/IGHV4-59/IGKV1-5/ZP4/IGHV3-7/KLK7/IGLV2-23/C6/IGLV2-11/IGLV6-57/IGKV1-12/IGKV1-16/IGKV1-17/IGKV2-28…
GO_B_CELL_RECEPTOR_SIGNALING_PATHWAY	GO_B_CELL_RECEPTOR_SIGNALING_PATHWAY	118	-0.64132	-1.40499	0.031746	1	1	8150	tags=47%, list=14%, signal=41%	CD22/IGHM/STAP1/FCGR2B/IGHV4-4/IGHG2/IGHA1/IGHG1/IGHV4-39/IGHV1-69/IGKC/IGLC2/IGHV1-24/IGHV3-21/IGHV3-30/MS4A1/IGHV7-81/IGHG3/IGHV3-11/IGLC3/IGLC6/IGHV3-53/IGHV2-70/IGHV3-48/IGHA2/IGHV2-26/IGHV3-74/IGHV1-18/IGHV3-23/IGHV3-49/IGHV5-51/IGLC7/IGHV3-15/IGHV4-34/IGHV3-73/IGHV4-31/IGHV1-69-2/IGHV3-33/IGHV3-16/IGHV4-59/IGHV3-7/IGHV3-66/IGHV6-1/IGLL5/IGHV3-43/IGHV4-61/IGHV1-45/IGHV4-28/IGHV1-58/IGHD/IGHV…
GO_ENDOTHELIAL_CELL_MIGRATION	GO_ENDOTHELIAL_CELL_MIGRATION	264	-0.560899	-1.39724	0.031746	1	1	4760	tags=8%, list=8%, signal=8%	MIR101-1/BMP10/APOH/MIR200B/FGF16/MIR640/MIR483/MIR150/MIR494/FGFBP1/MIR19B2/AGTR2/MIR196A1/MIR329-1/MIR133B/MIR424/MIR129-1/MIR31/MIR495/MIRLET7F2/MIR487B/MIR505
GO_REGULATION_OF_B_CELL_ACTIVATION	GO_REGULATION_OF_B_CELL_ACTIVATION	175	-0.56927	-1.33299	0.0322581	1	1	8420	tags=31%, list=14%, signal=26%	BANK1/IGHV4-4/IGHG2/MZB1/IGHA1/IGHG1/IGHV4-39/IGHV1-69/IGKC/IGLC2/IGHV1-24/IGHV3-21/IGHV3-30/IL10/IGHV7-81/IGHG3/IGHV3-11/IGLC3/IGLC6/IGHV3-53/IGHV2-70/IGHV3-48/IGHA2/IGHV2-26/IGHV3-74/IGHV1-18/IGHV3-23/IGHV3-49/IGHV5-51/IGLC7/IGHV3-15/IGHV4-34/IGHV3-73/IGHV4-31/IGHV1-69-2/IGHV3-33/IGHV3-16/IGHV4-59/IGHV3-7/IGHV3-66/IGHV6-1/IGLL5/IGHV3-43/IGHV4-61/IGHV1-45/IGHV4-28/IGHV1-58/IGHD/IGHV3-64/IGHV3-13…
GO_POSITIVE_REGULATION_OF_VASCULAR_ASSOCIATED_SMOOTH_MUSCLE_CELL_APOPTOTIC_PROCESS	GO_POSITIVE_REGULATION_OF_VASCULAR_ASSOCIATED_SMOOTH_MUSCLE_CELL_APOPTOTIC_PROCESS	10	0.88735	1.56187	0.0392157	1	1	1628	tags=20%, list=3%, signal=19%	MIR1-1/MIR140
GO_NEGATIVE_REGULATION_OF_LOW_DENSITY_LIPOPROTEIN_PARTICLE_CLEARANCE	GO_NEGATIVE_REGULATION_OF_LOW_DENSITY_LIPOPROTEIN_PARTICLE_CLEARANCE	14	0.882537	1.58951	0.0434783	1	1	582	tags=7%, list=1%, signal=7%	MIR133A2
GO_POSITIVE_REGULATION_OF_STRIATED_MUSCLE_CONTRACTION	GO_POSITIVE_REGULATION_OF_STRIATED_MUSCLE_CONTRACTION	14	0.856781	1.54313	0.0434783	1	1	406	tags=7%, list=1%, signal=7%	MIR1-1
GO_REGULATION_OF_EPITHELIAL_CELL_MIGRATION	GO_REGULATION_OF_EPITHELIAL_CELL_MIGRATION	282	-0.554691	-1.39569	0.0447761	1	1	4760	tags=8%, list=8%, signal=7%	MIR101-1/BMP10/APOH/MIR200B/FGF16/MIR640/MIR483/MIR150/MIR494/FGFBP1/MIR19B2/AGTR2/MIR196A1/MIR329-1/MIR133B/MIR424/MIR129-1/MIR31/MIR495/MIRLET7F2/MIR487B/MIR505
GO_NECROTIC_CELL_DEATH	GO_NECROTIC_CELL_DEATH	58	0.749757	1.57047	0.0454545	1	1	522	tags=3%, list=1%, signal=3%	MIR107/MIR485
GO_REGULATION_OF_CELL_MIGRATION_INVOLVED_IN_SPROUTING_ANGIOGENESIS	GO_REGULATION_OF_CELL_MIGRATION_INVOLVED_IN_SPROUTING_ANGIOGENESIS	79	-0.665387	-1.42583	0.0461538	1	1	3643	tags=15%, list=6%, signal=14%	MIR483/MIR150/MIR494/FGFBP1/MIR19B2/MIR196A1/MIR329-1/MIR424/MIR31/MIR495/MIRLET7F2/MIR487B
GO_REGULATION_OF_ENDOTHELIAL_CELL_MIGRATION	GO_REGULATION_OF_ENDOTHELIAL_CELL_MIGRATION	219	-0.584623	-1.43456	0.0461538	1	1	4760	tags=10%, list=8%, signal=9%	MIR101-1/BMP10/APOH/MIR200B/FGF16/MIR640/MIR483/MIR150/MIR494/FGFBP1/MIR19B2/AGTR2/MIR196A1/MIR329-1/MIR133B/MIR424/MIR129-1/MIR31/MIR495/MIRLET7F2/MIR487B/MIR505
GO_NEGATIVE_REGULATION_OF_AMYLOID_PRECURSOR_PROTEIN_CATABOLIC_PROCESS	GO_NEGATIVE_REGULATION_OF_AMYLOID_PRECURSOR_PROTEIN_CATABOLIC_PROCESS	16	0.872719	1.54947	0.0465116	1	1	380	tags=6%, list=1%, signal=6%	MIR107
GO_POSITIVE_REGULATION_OF_GLUCONEOGENESIS	GO_POSITIVE_REGULATION_OF_GLUCONEOGENESIS	15	0.846054	1.46722	0.0465116	1	1	2742	tags=13%, list=5%, signal=13%	MIR107/GCG
GO_TRNA_THREONYLCARBAMOYLADENOSINE_METABOLIC_PROCESS	GO_TRNA_THREONYLCARBAMOYLADENOSINE_METABOLIC_PROCESS	16	0.87257	1.54921	0.0465116	1	1	2350	tags=19%, list=4%, signal=18%	CTAG1B/CTAG1A/CTAG2
GO_DEFENSE_RESPONSE_TO_FUNGUS	GO_DEFENSE_RESPONSE_TO_FUNGUS	39	0.754999	1.48759	0.047619	1	1	2950	tags=15%, list=5%, signal=15%	DEFA1/DEFA1B/HTN3/IL17A/DEFB114/HTN1
GO_NEGATIVE_REGULATION_OF_POTASSIUM_ION_TRANSPORT	GO_NEGATIVE_REGULATION_OF_POTASSIUM_ION_TRANSPORT	39	0.741467	1.46093	0.047619	1	1	582	tags=5%, list=1%, signal=5%	MIR1-1/MIR133A2
GO_REGULATION_OF_ACTIN_FILAMENT_BASED_MOVEMENT	GO_REGULATION_OF_ACTIN_FILAMENT_BASED_MOVEMENT	46	0.734931	1.47334	0.0487805	1	1	582	tags=4%, list=1%, signal=4%	MIR1-1/MIR133A2
GO_NEGATIVE_REGULATION_OF_TOR_SIGNALING	GO_NEGATIVE_REGULATION_OF_TOR_SIGNALING	40	-0.756232	-1.45121	0.0491803	1	1	131	tags=5%, list=0%, signal=5%	CRYBA1/MIRLET7F2
GO_VASCULAR_ENDOTHELIAL_CELL_PROLIFERATION	GO_VASCULAR_ENDOTHELIAL_CELL_PROLIFERATION	46	-0.716402	-1.40436	0.0491803	1	1	2795	tags=22%, list=5%, signal=21%	GHSR/MIR329-1/MIR30B/MIR20B/MIR30E/MIR133B/MIR424/MIR129-1/MIR495/MIR487B

## Sheet: PAK6
ID	Description	setSize	enrichmentScore	NES	pvalue	p.adjust	qvalues	rank	leading_edge	core_enrichment
GO_PASSIVE_TRANSMEMBRANE_TRANSPORTER_ACTIVITY	GO_PASSIVE_TRANSMEMBRANE_TRANSPORTER_ACTIVITY	456	0.533061	1.37308	0.0135135	1	1	18670	tags=49%, list=32%, signal=33%	HTR3B/CLDN17/CLCA1/CNGA2/CNGB1/KCNV1/OPRM1/GABRA6/KCNS2/CHRNA2/CALHM1/TRPC5/HCN1/BSND/KCNK18/RYR2/GABRG1/SCN10A/TRPV6/KCNB2/AQP2/P2RX2/CACNG3/CACNA1B/KCNK16/GRIN2B/KCNC2/CACNG2/KCNJ3/GRIN2A/KCNT1/KCNH1/KCNA4/GABRA1/GABRB2/ASIC5/GJB6/GABRA5/GABRG2/HTR3A/CACNA1S/GRIN1/GJA8/PKD1L2/KCNG3/GABRG3/LRRC38/KCNH6/GLRA1/LRRC26/GLRA3/CACNA1I/KCNS1/KCNH5/CACNA1E/GABRA4/CNGA4/KCNK12/KCNK4/SLC5A8/LRRC52/CHRND/K…
GO_SYNAPTIC_MEMBRANE	GO_SYNAPTIC_MEMBRANE	429	0.531844	1.35828	0.0135135	1	1	19411	tags=45%, list=33%, signal=31%	HTR3B/SLC6A5/CDH9/OPRM1/UNC13C/HTR5A/GABRA6/CHRNA2/DLGAP2/DRD1/GABRG1/SCN10A/GRM5/GRM1/CACNG3/GRIN2B/KCNC2/CACNG2/KCNJ3/GRIN2A/KCNH1/GABRA1/GABRB2/GABRA5/GAD2/GABRG2/HTR3A/GRIN1/KCTD16/GABRG3/GLRA1/GLRA3/LRRC7/GRM2/GABRA4/CHRM1/CHRND/RIMS1/SLC6A2/CNTN5/SH2D5/MUSK/CHRM2/IQSEC3/CABP1/CALB2/DDN/SHANK1/HTR2A/PRKCG/SHANK2/LRFN5/DRD3/GABRA2/KCNA3/GABRR3/EPHA7/GRIP1/GRIN3A/RIMS2/SYT1/CBLN1/SHISA8/CDH8/S…
GO_GENE_SILENCING	GO_GENE_SILENCING	468	0.522991	1.34857	0.0138889	1	1	6279	tags=13%, list=11%, signal=11%	MIR31/MIR449A/MIR365B/MIR526A2/MIR711/MIR129-1/MIR509-2/MIR424/MIR208A/MIR1224/MIR767/MIR107/MIR518C/MIR133B/MIR203A/MIR485/MIR509-1/MIR133A2/MIR134/MIR30B/MIR128-1/MIR183/MIR200B/MIR100/MIR138-2/MIR638/MIR187/MIR99A/MIR9-3/MIR200A/MIR487B/MIR26A1/TNP1/MIR106A/MIR193B/MIR182/MIR511/MIR373/MIR191/MIR217/MIR101-1/MIR33A/MIR138-1/MIR196A1/MIRLET7C/MIR135B/MIR30C1/MIR154/MIR758/MIR130B/MIR543/MIR3909…
GO_GENE_SILENCING_BY_RNA	GO_GENE_SILENCING_BY_RNA	394	0.545339	1.38745	0.0140845	1	1	5926	tags=14%, list=10%, signal=13%	MIR31/MIR449A/MIR365B/MIR526A2/MIR711/MIR129-1/MIR509-2/MIR424/MIR208A/MIR1224/MIR767/MIR107/MIR518C/MIR133B/MIR203A/MIR485/MIR509-1/MIR133A2/MIR134/MIR30B/MIR128-1/MIR183/MIR200B/MIR100/MIR138-2/MIR638/MIR187/MIR99A/MIR9-3/MIR200A/MIR487B/MIR26A1/MIR106A/MIR193B/MIR182/MIR511/MIR373/MIR191/MIR217/MIR101-1/MIR33A/MIR138-1/MIR196A1/MIRLET7C/MIR135B/MIR30C1/MIR154/MIR758/MIR130B/MIR543/MIR3909/MIRL…
GO_CATION_CHANNEL_ACTIVITY	GO_CATION_CHANNEL_ACTIVITY	322	0.53514	1.31987	0.0142857	1	1	17789	tags=49%, list=30%, signal=34%	HTR3B/CNGA2/CNGB1/KCNV1/OPRM1/KCNS2/CHRNA2/CALHM1/TRPC5/HCN1/KCNK18/RYR2/SCN10A/TRPV6/KCNB2/P2RX2/CACNG3/CACNA1B/KCNK16/GRIN2B/KCNC2/CACNG2/KCNJ3/GRIN2A/KCNT1/KCNH1/KCNA4/ASIC5/HTR3A/CACNA1S/GRIN1/PKD1L2/KCNG3/LRRC38/KCNH6/LRRC26/CACNA1I/KCNS1/KCNH5/CACNA1E/CNGA4/KCNK12/KCNK4/LRRC52/CHRND/KCNH7/ASIC2/KCNJ12/SCN9A/KCNK9/TMC1/KCNJ1/KCNA3/KCNA5/SLC24A4/KCNJ13/GRIN3A/KCNE5/CACNA2D3/KCNA1/SCN2B/CACNA1…
GO_GATED_CHANNEL_ACTIVITY	GO_GATED_CHANNEL_ACTIVITY	340	0.542753	1.34161	0.0142857	1	1	17789	tags=49%, list=30%, signal=34%	HTR3B/CLCA1/CNGA2/CNGB1/KCNV1/OPRM1/GABRA6/KCNS2/CHRNA2/CALHM1/HCN1/KCNK18/RYR2/GABRG1/SCN10A/KCNB2/P2RX2/CACNG3/CACNA1B/KCNK16/GRIN2B/KCNC2/CACNG2/KCNJ3/GRIN2A/KCNT1/KCNH1/KCNA4/GABRA1/GABRB2/ASIC5/GABRA5/GABRG2/HTR3A/CACNA1S/GRIN1/KCNG3/GABRG3/LRRC38/KCNH6/GLRA1/LRRC26/GLRA3/CACNA1I/KCNS1/KCNH5/CACNA1E/GABRA4/CNGA4/KCNK12/KCNK4/LRRC52/CHRND/KCNH7/ASIC2/KCNJ12/SCN9A/KCNK9/TMC1/CLIC5/CLCNKA/TMC5/…
GO_POSTSYNAPTIC_MEMBRANE	GO_POSTSYNAPTIC_MEMBRANE	324	0.532999	1.31197	0.0144928	1	1	19411	tags=46%, list=33%, signal=31%	HTR3B/CDH9/OPRM1/HTR5A/GABRA6/CHRNA2/DLGAP2/DRD1/GABRG1/GRM5/GRM1/CACNG3/GRIN2B/KCNC2/CACNG2/GRIN2A/KCNH1/GABRA1/GABRB2/GABRA5/GABRG2/HTR3A/GRIN1/KCTD16/GABRG3/GLRA1/GLRA3/LRRC7/GRM2/GABRA4/CHRM1/CHRND/SH2D5/MUSK/CHRM2/IQSEC3/CABP1/SHANK1/HTR2A/SHANK2/LRFN5/DRD3/GABRA2/KCNA3/GABRR3/EPHA7/GRIP1/GRIN3A/CBLN1/SHISA8/ADRA2C/KCNA1/CHRNB3/NEURL1/CAMK2A/GABRB1/DLGAP3/CHRM4/GABRA3/GRM7/ADRA1A/CPEB3/GRIN2…
GO_TRANSPORTER_COMPLEX	GO_TRANSPORTER_COMPLEX	324	0.566027	1.39327	0.0144928	1	1	17789	tags=49%, list=30%, signal=34%	HTR3B/CLDN17/CNGB1/KCNV1/GABRA6/KCNS2/CHRNA2/TRPC5/ATP1B4/HCN1/RYR2/GABRG1/SCN10A/KCNB2/CACNG3/CATSPERD/CACNA1B/GRIN2B/KCNC2/CACNG2/KCNJ3/GRIN2A/KCNH1/KCNA4/ATP12A/OLFM3/GABRA1/GABRB2/GABRA5/GABRG2/HTR3A/CACNA1S/NOS1/GRIN1/KCNG3/GABRG3/LRRC38/GLRA1/LRRC26/GLRA3/LRRC7/CACNA1I/KCNS1/CACNA1E/GABRA4/KCNK4/LRRC52/CHRND/SCN9A/SHANK1/CLIC5/CLCNKA/SHANK2/GABRA2/KCNJ1/KCNA3/GABRR3/KCNA5/GRIN3A/KCNE5/CLCNK…
GO_NEGATIVE_REGULATION_OF_NECROTIC_CELL_DEATH	GO_NEGATIVE_REGULATION_OF_NECROTIC_CELL_DEATH	20	0.837872	1.5225	0.0147059	1	1	4348	tags=10%, list=7%, signal=9%	MIR485/MIR101-1
GO_STORE_OPERATED_CALCIUM_ENTRY	GO_STORE_OPERATED_CALCIUM_ENTRY	20	0.849015	1.54275	0.0147059	1	1	320	tags=5%, list=1%, signal=5%	MIR424
GO_AMYLOID_PRECURSOR_PROTEIN_CATABOLIC_PROCESS	GO_AMYLOID_PRECURSOR_PROTEIN_CATABOLIC_PROCESS	46	0.740446	1.53226	0.0149254	1	1	485	tags=2%, list=1%, signal=2%	MIR107
GO_CATION_CHANNEL_COMPLEX	GO_CATION_CHANNEL_COMPLEX	214	0.586634	1.40148	0.0149254	1	1	17771	tags=53%, list=30%, signal=37%	HTR3B/CNGB1/KCNV1/KCNS2/TRPC5/HCN1/RYR2/SCN10A/KCNB2/CACNG3/CATSPERD/CACNA1B/GRIN2B/KCNC2/CACNG2/KCNJ3/GRIN2A/KCNH1/KCNA4/OLFM3/HTR3A/CACNA1S/NOS1/GRIN1/KCNG3/LRRC38/LRRC26/CACNA1I/KCNS1/CACNA1E/KCNK4/LRRC52/SCN9A/SHANK1/KCNJ1/KCNA3/KCNA5/GRIN3A/KCNE5/CACNA2D3/CNTNAP2/SHISA8/KCNA1/SCN2B/CACNA1F/HCN4/KCNG4/VWC2L/GRIN2C/CACNA2D2/KCNB1/SCN3B/KCNJ4/GRIN3B/VWC2/KCNJ6/KCNC4/CASQ2/KCNIP3/RYR1/KCNQ4/KCNQ…
GO_G0_TO_G1_TRANSITION	GO_G0_TO_G1_TRANSITION	46	0.750186	1.55242	0.0149254	1	1	320	tags=2%, list=1%, signal=2%	MIR424
GO_IRON_SULFUR_CLUSTER_ASSEMBLY	GO_IRON_SULFUR_CLUSTER_ASSEMBLY	19	0.872627	1.56367	0.0149254	1	1	863	tags=5%, list=1%, signal=5%	BOLA2
GO_NEGATIVE_REGULATION_OF_PHOSPHATIDYLINOSITOL_3_KINASE_SIGNALING	GO_NEGATIVE_REGULATION_OF_PHOSPHATIDYLINOSITOL_3_KINASE_SIGNALING	15	0.920921	1.62307	0.0149254	1	1	188	tags=7%, list=0%, signal=7%	MIR449A
GO_POSITIVE_REGULATION_OF_SEQUESTERING_OF_CALCIUM_ION	GO_POSITIVE_REGULATION_OF_SEQUESTERING_OF_CALCIUM_ION	15	0.875058	1.54224	0.0149254	1	1	3454	tags=20%, list=6%, signal=19%	MIR133A2/TRDN/RYR2
GO_REGULATION_OF_AMYLOID_PRECURSOR_PROTEIN_CATABOLIC_PROCESS	GO_REGULATION_OF_AMYLOID_PRECURSOR_PROTEIN_CATABOLIC_PROCESS	36	0.760762	1.49572	0.0149254	1	1	485	tags=3%, list=1%, signal=3%	MIR107
GO_REGULATION_OF_STORE_OPERATED_CALCIUM_ENTRY	GO_REGULATION_OF_STORE_OPERATED_CALCIUM_ENTRY	14	0.887705	1.5514	0.0149254	1	1	320	tags=7%, list=1%, signal=7%	MIR424
GO_SOMATIC_DIVERSIFICATION_OF_IMMUNE_RECEPTORS_VIA_SOMATIC_MUTATION	GO_SOMATIC_DIVERSIFICATION_OF_IMMUNE_RECEPTORS_VIA_SOMATIC_MUTATION	18	0.844292	1.45983	0.0149254	1	1	4449	tags=11%, list=8%, signal=10%	PMS2P6/PMS2P11
GO_DNA_REPAIR_COMPLEX	GO_DNA_REPAIR_COMPLEX	38	0.811968	1.5989	0.0151515	1	1	4449	tags=5%, list=8%, signal=5%	PMS2P6/PMS2P11
GO_NEGATIVE_REGULATION_OF_ERK1_AND_ERK2_CASCADE	GO_NEGATIVE_REGULATION_OF_ERK1_AND_ERK2_CASCADE	75	0.798046	1.75806	0.0151515	1	1	723	tags=4%, list=1%, signal=4%	MIR424/MIR133B/MIR133A2
GO_REGULATION_OF_NECROTIC_CELL_DEATH	GO_REGULATION_OF_NECROTIC_CELL_DEATH	35	0.812764	1.57813	0.0151515	1	1	636	tags=6%, list=1%, signal=6%	MIR107/MIR485
GO_RNA_BINDING_INVOLVED_IN_POSTTRANSCRIPTIONAL_GENE_SILENCING	GO_RNA_BINDING_INVOLVED_IN_POSTTRANSCRIPTIONAL_GENE_SILENCING	242	0.560647	1.33475	0.0151515	1	1	5922	tags=22%, list=10%, signal=20%	MIR31/MIR449A/MIR365B/MIR526A2/MIR129-1/MIR509-2/MIR424/MIR208A/MIR1224/MIR767/MIR107/MIR518C/MIR133B/MIR203A/MIR485/MIR509-1/MIR133A2/MIR134/MIR30B/MIR128-1/MIR183/MIR200B/MIR100/MIR138-2/MIR638/MIR187/MIR99A/MIR9-3/MIR200A/MIR487B/MIR26A1/MIR106A/MIR193B/MIR182/MIR511/MIR373/MIR191/MIR217/MIR101-1/MIR33A/MIR138-1/MIR196A1/MIRLET7C/MIR135B/MIR30C1/MIR154/MIR758/MIR130B/MIR543/MIR3909/MIRLET7A2/M…
GO_CELLULAR_RESPONSE_TO_HYDROGEN_PEROXIDE	GO_CELLULAR_RESPONSE_TO_HYDROGEN_PEROXIDE	97	0.696569	1.55924	0.0153846	1	1	723	tags=2%, list=1%, signal=2%	MIR107/MIR133A2
GO_GLYCOLIPID_CATABOLIC_PROCESS	GO_GLYCOLIPID_CATABOLIC_PROCESS	16	0.88334	1.51383	0.0153846	1	1	3831	tags=12%, list=7%, signal=12%	NEU2/GBA3
GO_NEGATIVE_REGULATION_OF_AMYLOID_PRECURSOR_PROTEIN_CATABOLIC_PROCESS	GO_NEGATIVE_REGULATION_OF_AMYLOID_PRECURSOR_PROTEIN_CATABOLIC_PROCESS	16	0.871901	1.49422	0.0153846	1	1	485	tags=6%, list=1%, signal=6%	MIR107
GO_OLIGOSACCHARIDE_CATABOLIC_PROCESS	GO_OLIGOSACCHARIDE_CATABOLIC_PROCESS	13	0.87535	1.50079	0.0153846	1	1	3831	tags=15%, list=7%, signal=14%	NEU2/GBA3
GO_AV_NODE_CELL_TO_BUNDLE_OF_HIS_CELL_COMMUNICATION	GO_AV_NODE_CELL_TO_BUNDLE_OF_HIS_CELL_COMMUNICATION	12	0.851787	1.44214	0.015625	1	1	3510	tags=25%, list=6%, signal=24%	MIR208A/RYR2/SCN10A
GO_MISMATCH_REPAIR_COMPLEX	GO_MISMATCH_REPAIR_COMPLEX	12	0.889337	1.50571	0.015625	1	1	4449	tags=17%, list=8%, signal=15%	PMS2P6/PMS2P11
GO_MODIFICATION_BY_SYMBIONT_OF_HOST_MORPHOLOGY_OR_PHYSIOLOGY	GO_MODIFICATION_BY_SYMBIONT_OF_HOST_MORPHOLOGY_OR_PHYSIOLOGY	43	0.842263	1.72532	0.015625	1	1	3243	tags=9%, list=6%, signal=9%	DEFA1/DEFA1B/KRT6A/KPNA7
GO_NEGATIVE_REGULATION_OF_CAMP_DEPENDENT_PROTEIN_KINASE_ACTIVITY	GO_NEGATIVE_REGULATION_OF_CAMP_DEPENDENT_PROTEIN_KINASE_ACTIVITY	11	0.902086	1.49233	0.015873	1	1	723	tags=9%, list=1%, signal=9%	MIR133A2
GO_PROGRAMMED_NECROTIC_CELL_DEATH	GO_PROGRAMMED_NECROTIC_CELL_DEATH	48	0.789124	1.61271	0.015873	1	1	636	tags=4%, list=1%, signal=4%	MIR107/MIR485
GO_PROTEIN_MATURATION_BY_IRON_SULFUR_CLUSTER_TRANSFER	GO_PROTEIN_MATURATION_BY_IRON_SULFUR_CLUSTER_TRANSFER	11	0.904413	1.49618	0.015873	1	1	863	tags=9%, list=1%, signal=9%	BOLA2
GO_REGULATION_OF_PROGRAMMED_NECROTIC_CELL_DEATH	GO_REGULATION_OF_PROGRAMMED_NECROTIC_CELL_DEATH	25	0.835862	1.57428	0.015873	1	1	636	tags=8%, list=1%, signal=8%	MIR107/MIR485
GO_NECROTIC_CELL_DEATH	GO_NECROTIC_CELL_DEATH	58	0.76788	1.58797	0.016129	1	1	636	tags=3%, list=1%, signal=3%	MIR107/MIR485
GO_ENDOTHELIAL_CELL_CHEMOTAXIS	GO_ENDOTHELIAL_CELL_CHEMOTAXIS	30	0.766856	1.43884	0.0163934	1	1	4078	tags=7%, list=7%, signal=6%	MIR424/FGF16
GO_RESPONSE_TO_PROTOZOAN	GO_RESPONSE_TO_PROTOZOAN	27	0.855044	1.58714	0.0163934	1	1	1322	tags=7%, list=2%, signal=7%	DEFA1/DEFA1B
GO_REGULATION_OF_LEUKOCYTE_ADHESION_TO_VASCULAR_ENDOTHELIAL_CELL	GO_REGULATION_OF_LEUKOCYTE_ADHESION_TO_VASCULAR_ENDOTHELIAL_CELL	28	0.806121	1.5058	0.0169492	1	1	132	tags=4%, list=0%, signal=4%	MIR31
GO_T_CELL_CHEMOTAXIS	GO_T_CELL_CHEMOTAXIS	28	0.818259	1.52847	0.0169492	1	1	1322	tags=7%, list=2%, signal=7%	DEFA1/DEFA1B
GO_CARDIAC_VASCULAR_SMOOTH_MUSCLE_CELL_DIFFERENTIATION	GO_CARDIAC_VASCULAR_SMOOTH_MUSCLE_CELL_DIFFERENTIATION	10	-0.906926	-1.59137	0.0243902	1	1	439	tags=30%, list=1%, signal=30%	MYOCD/GATA6/MIR1-1
GO_OXIDOREDUCTASE_ACTIVITY_OXIDIZING_METAL_IONS_OXYGEN_AS_ACCEPTOR	GO_OXIDOREDUCTASE_ACTIVITY_OXIDIZING_METAL_IONS_OXYGEN_AS_ACCEPTOR	10	-0.915599	-1.60658	0.0243902	1	1	742	tags=20%, list=1%, signal=20%	HEPHL1/FTHL17
GO_REGULATION_OF_MESODERM_FORMATION	GO_REGULATION_OF_MESODERM_FORMATION	10	-0.905155	-1.58826	0.0243902	1	1	439	tags=20%, list=1%, signal=20%	BMPR1A/MIR1-1
GO_VIRION_BINDING	GO_VIRION_BINDING	10	-0.904532	-1.58717	0.0243902	1	1	1011	tags=20%, list=2%, signal=20%	PTX3/APCS
GO_LIPOPOLYSACCHARIDE_MEDIATED_SIGNALING_PATHWAY	GO_LIPOPOLYSACCHARIDE_MEDIATED_SIGNALING_PATHWAY	58	-0.715931	-1.62267	0.025	1	1	260	tags=3%, list=0%, signal=3%	BPI/DEFB114
GO_MODULATION_BY_HOST_OF_VIRAL_PROCESS	GO_MODULATION_BY_HOST_OF_VIRAL_PROCESS	26	-0.808634	-1.58742	0.025	1	1	1011	tags=8%, list=2%, signal=8%	CCL8/APCS
GO_POSITIVE_REGULATION_OF_INTRINSIC_APOPTOTIC_SIGNALING_PATHWAY	GO_POSITIVE_REGULATION_OF_INTRINSIC_APOPTOTIC_SIGNALING_PATHWAY	58	-0.782477	-1.7735	0.025	1	1	501	tags=3%, list=1%, signal=3%	NOX1/MIR15A
GO_STRUCTURAL_CONSTITUENT_OF_RIBOSOME	GO_STRUCTURAL_CONSTITUENT_OF_RIBOSOME	161	-0.626992	-1.58683	0.025	1	1	18327	tags=89%, list=31%, signal=62%	MRPS24/MRPL23/MRPS14/DAP3/MRPL57/MRPL37/MRPS17/MRPS31/MRPL2/MRPS34/MRPS9/MRPS5/MRPL18/MRPL41/MRPS36/RPL22/MRPS21/MRPL9/MRPL55/MRPL30/MRPL3/MRPL17/RPL37/RPS6/RPL3/MRPS35/RPS4X/RPL11/MRPS23/MRPS18C/RPL6/MRPL24/MRPL47/RPL7/RPL26L1/MRPL21/RPS23/MRPL27/RPL36AL/RPS25/MRPS22/RPL7A/MRPL14/MRPL16/RPL15/MRPS7/RPL4/RPS13/MRPL51/RPL19/RPS24/RPS2/MRPS18A/RPL10A/RPL8/RPL12/RPS12/RPLP2/UBA52/RPL31/RPL41/RPL38/R…
GO_FERROUS_IRON_BINDING	GO_FERROUS_IRON_BINDING	24	-0.817911	-1.55902	0.025641	1	1	742	tags=8%, list=1%, signal=8%	ACP5/FTHL17
GO_METHYL_CPG_BINDING	GO_METHYL_CPG_BINDING	25	-0.789201	-1.50322	0.025641	1	1	3799	tags=20%, list=7%, signal=19%	HOXB13/CDX2/MBD3L3/MBD3L2/MBD3L5
GO_NEGATIVE_REGULATION_OF_I_KAPPAB_KINASE_NF_KAPPAB_SIGNALING	GO_NEGATIVE_REGULATION_OF_I_KAPPAB_KINASE_NF_KAPPAB_SIGNALING	49	-0.852462	-1.89265	0.025641	1	1	501	tags=6%, list=1%, signal=6%	TNIP3/MIR15A/MIR15B
GO_REGULATION_OF_LIPOPOLYSACCHARIDE_MEDIATED_SIGNALING_PATHWAY	GO_REGULATION_OF_LIPOPOLYSACCHARIDE_MEDIATED_SIGNALING_PATHWAY	25	-0.815884	-1.55404	0.025641	1	1	260	tags=8%, list=0%, signal=8%	CD36/DEFB114
GO_VENTRICULAR_SEPTUM_MORPHOGENESIS	GO_VENTRICULAR_SEPTUM_MORPHOGENESIS	42	-0.777808	-1.67261	0.025641	1	1	439	tags=5%, list=1%, signal=5%	NKX2-5/MIR1-1
GO_NEGATIVE_REGULATION_BY_HOST_OF_VIRAL_PROCESS	GO_NEGATIVE_REGULATION_BY_HOST_OF_VIRAL_PROCESS	12	-0.887323	-1.57816	0.0263158	1	1	1011	tags=17%, list=2%, signal=16%	CCL8/APCS
GO_CHROMATIN_ORGANIZATION_INVOLVED_IN_REGULATION_OF_TRANSCRIPTION	GO_CHROMATIN_ORGANIZATION_INVOLVED_IN_REGULATION_OF_TRANSCRIPTION	80	-0.573051	-1.32086	0.027027	1	1	3701	tags=4%, list=6%, signal=4%	MBD3L3/MBD3L2/MBD3L5
GO_COTRANSLATIONAL_PROTEIN_TARGETING_TO_MEMBRANE	GO_COTRANSLATIONAL_PROTEIN_TARGETING_TO_MEMBRANE	98	-0.632319	-1.49849	0.027027	1	1	16312	tags=83%, list=28%, signal=60%	TRAM1/RPL37/RPS6/RPL3/RPS4X/RPL11/SEC61B/RPL6/RPL7/RPS23/RPS25/RPL7A/RPL15/RPL4/RPS13/RPL19/RPS24/RPS2/RPL10A/RPL8/RPL12/RPS12/RPLP2/UBA52/RPL31/RPL41/RPL38/RPL23/RPS14/RPL5/RPS20/RPL13/RPL26/RPS27/RPL23A/RPL10/RPL35A/RPL35/RPL21/RPL30/RPL29/RPS15/RPS26/RPL37A/RPL14/RPS11/RPL24/RPS27A/RPL32/RPS8/RPLP1/RPS9/RPL34/RPS3/RPL13A/RPS10/RPL27/RPS28/RPS3A/RPLP0/RPL36A/RPL18/RPS18/RPS17/RPL28/RPL9/RPS21/R…
GO_METAL_ION_TRANSMEMBRANE_TRANSPORTER_ACTIVITY	GO_METAL_ION_TRANSMEMBRANE_TRANSPORTER_ACTIVITY	440	0.513142	1.31717	0.027027	1	1	18831	tags=48%, list=32%, signal=32%	ABCB11/SLC10A2/SLC6A5/KCNV1/OPRM1/KCNS2/SLC6A7/CALHM1/TRPC5/HCN1/KCNK18/RYR2/SCN10A/TRPV6/KCNB2/ATP2B3/CACNG3/CACNA1B/KCNK16/GRIN2B/KCNC2/CACNG2/KCNJ3/GRIN2A/KCNT1/KCNH1/KCNA4/ATP12A/ASIC5/SLC34A3/SLC13A5/CACNA1S/GRIN1/PKD1L2/KCNG3/LRRC38/KCNH6/SLC13A2/LRRC26/SLC6A14/CACNA1I/SLC8A2/SLC28A3/KCNS1/KCNH5/SLC6A15/CACNA1E/KCNK12/KCNK4/SLC5A8/LRRC52/SLC6A17/KCNH7/SLC6A2/ASIC2/KCNJ12/SCN9A/KCNK9/TMC1/KC…
GO_METHYLATION_DEPENDENT_CHROMATIN_SILENCING	GO_METHYLATION_DEPENDENT_CHROMATIN_SILENCING	22	-0.782757	-1.4448	0.027027	1	1	3701	tags=14%, list=6%, signal=13%	MBD3L3/MBD3L2/MBD3L5
GO_NEGATIVE_REGULATION_OF_MAP_KINASE_ACTIVITY	GO_NEGATIVE_REGULATION_OF_MAP_KINASE_ACTIVITY	79	-0.744069	-1.69301	0.027027	1	1	260	tags=4%, list=0%, signal=4%	SERPINB3/DEFB114/MIR218-1
GO_NEGATIVE_REGULATION_OF_PEPTIDYL_THREONINE_PHOSPHORYLATION	GO_NEGATIVE_REGULATION_OF_PEPTIDYL_THREONINE_PHOSPHORYLATION	21	-0.88219	-1.59209	0.027027	1	1	2527	tags=10%, list=4%, signal=9%	MIR103A1/MIR15A
GO_U2_SNRNP	GO_U2_SNRNP	21	-0.860895	-1.55366	0.027027	1	1	1246	tags=52%, list=2%, signal=51%	SF3B5/SNRPD3/SNRPA1/SNRPD1/SNRPGP15/SNRPB2/SNRPG/PHF5A/SNRPD2/SNRPB/RBMY1E
GO_IMMUNOGLOBULIN_COMPLEX	GO_IMMUNOGLOBULIN_COMPLEX	137	-0.609393	-1.51681	0.0277778	1	1	11019	tags=39%, list=19%, signal=32%	IGLL5/IGHV5-51/IGLV5-37/IGHV4-34/IGKV6-21/IGLV8-61/IGKV1-39/IGLV7-46/IGKV1D-17/IGKV3-15/IGHV2-5/IGHV3-15/IGLV3-19/IGHV1-24/IGHV4-61/IGLV4-69/IGLV2-8/IGHV3-38/IGKV1D-33/IGLV2-23/IGKV2-29/IGHV6-1/IGLV7-43/IGKV2-24/IGLL1/IGLV3-27/IGLV5-45/TRDC/IGHV2-70/IGHV1-69-2/IGKV3D-7/IGHV3-33/IGLC7/IGKV1-8/IGKV2D-30/IGHV3-20/IGHV3-43/IGKV3D-15/IGLV4-60/IGKV1D-13/IGHV3-13/IGKV2-30/IGKV2D-28/IGLV2-18/IGHV1-58/IGH…
GO_MRNA_BINDING	GO_MRNA_BINDING	491	0.515881	1.33194	0.0277778	1	1	6819	tags=13%, list=12%, signal=12%	MIR31/MIR449A/MIR365B/MIR526A2/MIR129-1/MIR509-2/MIR424/MIR208A/MIR1224/MIR767/MIR107/MIR518C/MIR133B/MIR203A/MIR485/MIR509-1/MIR133A2/MIR134/MIR30B/MIR128-1/MIR183/MIR200B/MIR100/MIR138-2/MIR638/MIR187/MIR99A/MIR9-3/MIR200A/MIR487B/MIR26A1/MIR106A/MIR193B/MIR182/MIR511/MIR373/MIR191/MIR217/MIR101-1/RBFOX3/MIR33A/RBMXL2/MIR138-1/MIR196A1/MIRLET7C/RBFOX1/MIR135B/MIR30C1/MIR154/MIR758/MIR130B/MIR54…
GO_RIBOSOMAL_SUBUNIT	GO_RIBOSOMAL_SUBUNIT	183	-0.608737	-1.57184	0.0277778	1	1	18327	tags=86%, list=31%, signal=59%	MRPS24/MRPL23/MRPS10/MRPS14/DAP3/MRPL57/MRPL37/MRPS17/MRPS31/MRPL2/MRPS34/MRPS9/MRPS5/MRPL18/MRPL41/MRPL39/RBM3/MALSU1/MRPS36/NPM1/HBA1/RPL22/MRPL38/MRPS21/MRPL9/MRPL55/MRPL50/MRPL30/NDUFAB1/MRPL3/MRPL17/MCTS1/MRPL45/RPL37/RPS6/RPL3/MRPS35/RPS4X/MPV17L2/RPL11/MRPS18C/RPL6/MRPL24/MRPL47/RPL7/RPL26L1/MRPL21/MRPL44/RPS23/MRPL27/RPL36AL/RPS25/MRPS22/RPL7A/MRPL14/MRPL16/RPL15/MRPS7/RPL4/RPS13/MRPS26/M…
GO_CELL_MIGRATION_INVOLVED_IN_HEART_DEVELOPMENT	GO_CELL_MIGRATION_INVOLVED_IN_HEART_DEVELOPMENT	18	-0.821972	-1.51811	0.0285714	1	1	439	tags=11%, list=1%, signal=11%	PITX2/MIR1-1
GO_CHAPERONE_MEDIATED_PROTEIN_COMPLEX_ASSEMBLY	GO_CHAPERONE_MEDIATED_PROTEIN_COMPLEX_ASSEMBLY	19	-0.860783	-1.55408	0.0285714	1	1	1011	tags=11%, list=2%, signal=10%	HOPX/APCS
GO_CORONARY_VASCULATURE_MORPHOGENESIS	GO_CORONARY_VASCULATURE_MORPHOGENESIS	17	-0.804238	-1.50159	0.0285714	1	1	439	tags=12%, list=1%, signal=12%	TBX1/MIR1-1
GO_CYTOSOLIC_RIBOSOME	GO_CYTOSOLIC_RIBOSOME	102	-0.59684	-1.42054	0.0285714	1	1	16205	tags=86%, list=28%, signal=62%	MCTS1/RPL37/RPS6/RPL3/RPS4X/RPL11/RPL6/RPL7/RPL26L1/RPS23/RPL36AL/RPS25/RPL7A/RPL15/RPL4/RPS13/RPL19/RPS24/RPS2/RPL10A/RPL8/RPL12/RPS12/RPLP2/UBA52/RPL31/EIF2D/RPL41/RPL38/RPL23/RPS14/RPL5/RPS20/RPL13/RPL26/RPS27/RPL23A/RPL10/RPL35A/RPL35/RPL21/RPL30/RPL29/RPS15/RPS26/RPL37A/RPL14/RSL24D1/RPS11/RPL24/RPS27A/RPL32/RPS8/RPLP1/RPS9/RPL34/RPS3/RPL13A/RPS10/RPL27/RPS28/RPS3A/RPLP0/RPL36A/RPL18/RPS18/R…
GO_LARGE_RIBOSOMAL_SUBUNIT	GO_LARGE_RIBOSOMAL_SUBUNIT	116	-0.588289	-1.425	0.0285714	1	1	17270	tags=83%, list=30%, signal=58%	MRPL18/MRPL41/MRPL39/RBM3/MALSU1/NPM1/RPL22/MRPL38/MRPL9/MRPL55/MRPL50/MRPL30/NDUFAB1/MRPL3/MRPL17/MRPL45/RPL37/RPL3/MPV17L2/RPL11/RPL6/MRPL24/MRPL47/RPL7/RPL26L1/MRPL21/MRPL44/MRPL27/RPL36AL/RPL7A/MRPL14/MRPL16/RPL15/RPL4/MRPL51/RPL19/MRPS18A/RPL10A/RPL8/RPL12/RPLP2/UBA52/RPL31/RPL41/RPL38/RPL23/MRPL42/RPL5/RPL13/MRPL34/RPL26/MRPL32/RPL23A/RPL10/RPL35A/MRPL43/RPL35/RPL21/MRPL22/MRPL4/RPL30/RPL29…
GO_MITOCHONDRIAL_TRANSLATION	GO_MITOCHONDRIAL_TRANSLATION	132	-0.564642	-1.39192	0.0285714	1	1	19383	tags=75%, list=33%, signal=50%	AURKAIP1/MRPL28/MRPL35/MRPL10/MRPS2/MTG1/MRPS18B/MRPL49/RPUSD3/ERAL1/FASTKD3/RPUSD4/MRPS24/MRPL23/MRPS10/MRPS14/RMND1/DAP3/MRPL57/PTCD3/MRPL37/MRPS17/MRPS31/MTIF3/MRPL2/TRUB2/MRPS34/MRPS9/FASTKD2/MRPS5/MRPL18/UQCC1/MRPL41/MRPL39/COA3/MALSU1/MRPS36/TRMT10C/MRPL38/MRPS21/MRPL9/MRPL55/CDK5RAP1/MRPL50/MRPL30/MRPL3/MRPL17/MRPL45/MRPS35/C1QBP/MPV17L2/SHMT2/MRPS23/MRPS18C/MRPL24/MRPL47/YARS2/OXA1L/MRPL2…
GO_NEGATIVE_REGULATION_OF_COLLAGEN_METABOLIC_PROCESS	GO_NEGATIVE_REGULATION_OF_COLLAGEN_METABOLIC_PROCESS	18	-0.868221	-1.60353	0.0285714	1	1	52	tags=22%, list=0%, signal=22%	MIR218-2/MIR92A2/MIR29A/MIR218-1
GO_NEGATIVE_REGULATION_OF_GENE_EXPRESSION_EPIGENETIC	GO_NEGATIVE_REGULATION_OF_GENE_EXPRESSION_EPIGENETIC	84	-0.573185	-1.32182	0.0285714	1	1	3701	tags=4%, list=6%, signal=3%	MBD3L3/MBD3L2/MBD3L5
GO_OPSONIN_BINDING	GO_OPSONIN_BINDING	15	-0.836003	-1.53888	0.0285714	1	1	1011	tags=13%, list=2%, signal=13%	CRP/APCS
GO_OXIDOREDUCTASE_ACTIVITY_OXIDIZING_METAL_IONS	GO_OXIDOREDUCTASE_ACTIVITY_OXIDIZING_METAL_IONS	19	-0.822406	-1.48479	0.0285714	1	1	742	tags=11%, list=1%, signal=10%	STEAP4/FTHL17
GO_POSITIVE_REGULATION_OF_SMOOTH_MUSCLE_CELL_APOPTOTIC_PROCESS	GO_POSITIVE_REGULATION_OF_SMOOTH_MUSCLE_CELL_APOPTOTIC_PROCESS	17	-0.799741	-1.4932	0.0285714	1	1	439	tags=18%, list=1%, signal=18%	IFNG/MIR24-2/MIR1-1
GO_POSITIVE_REGULATION_OF_TRANSLATION	GO_POSITIVE_REGULATION_OF_TRANSLATION	125	-0.633692	-1.55612	0.0285714	1	1	4668	tags=6%, list=8%, signal=5%	LIN28A/DAZ3/DAZ2/DAZL/DAZ4/DAZ1/MIR15B
GO_RIBONUCLEASE_ACTIVITY	GO_RIBONUCLEASE_ACTIVITY	104	-0.581924	-1.40846	0.0285714	1	1	1517	tags=3%, list=3%, signal=3%	RNASE8/PIWIL1/RNASE12
GO_TRANSLATIONAL_TERMINATION	GO_TRANSLATIONAL_TERMINATION	103	-0.556413	-1.34177	0.0285714	1	1	19383	tags=78%, list=33%, signal=52%	AURKAIP1/MRPL28/MRPL35/MRPL10/MRPS2/MRPS18B/MRPL49/ERAL1/MRPS24/MRPL23/MRPS10/MRPS14/DAP3/MRPL57/PTCD3/MRPL37/MRPS17/MRPS31/MRPL2/MRPS34/MRPS9/TRMT112/MRPS5/MRPL18/MRPL41/MRPL39/MRPS36/EIF5A/MRPL38/MRPS21/MRPL9/MRPL55/MRPL50/MRPL30/MRPL3/MRPL17/MRPL45/ABCE1/MRPS35/MRPS23/MRPS18C/MRPL24/MRPL47/OXA1L/MRPL21/MRPL44/MRPL27/MRPS22/CHCHD1/MRPL14/MRPL16/MRPS7/MRPS26/MRPL51/MRPS18A/MTRF1/MRPL42/MRPL34/MR…
GO_MITOCHONDRIAL_TRANSLATIONAL_TERMINATION	GO_MITOCHONDRIAL_TRANSLATIONAL_TERMINATION	88	-0.630775	-1.46528	0.0294118	1	1	19383	tags=86%, list=33%, signal=58%	AURKAIP1/MRPL28/MRPL35/MRPL10/MRPS2/MRPS18B/MRPL49/ERAL1/MRPS24/MRPL23/MRPS10/MRPS14/DAP3/MRPL57/PTCD3/MRPL37/MRPS17/MRPS31/MRPL2/MRPS34/MRPS9/MRPS5/MRPL18/MRPL41/MRPL39/MRPS36/MRPL38/MRPS21/MRPL9/MRPL55/MRPL50/MRPL30/MRPL3/MRPL17/MRPL45/MRPS35/MRPS23/MRPS18C/MRPL24/MRPL47/OXA1L/MRPL21/MRPL44/MRPL27/MRPS22/CHCHD1/MRPL14/MRPL16/MRPS7/MRPS26/MRPL51/MRPS18A/MTRF1/MRPL42/MRPL34/MRPL32/MRPL43/MRPS11/M…
GO_REGULATION_OF_MESODERM_DEVELOPMENT	GO_REGULATION_OF_MESODERM_DEVELOPMENT	20	-0.815826	-1.47151	0.0294118	1	1	439	tags=10%, list=1%, signal=10%	ETV2/MIR1-1
GO_RIBOSOME	GO_RIBOSOME	224	-0.523096	-1.38696	0.0294118	1	1	18327	tags=78%, list=31%, signal=54%	MRPS24/MRPL23/MRPS10/MRPS14/DAP3/MRPL57/PTCD3/EEF2/APOD/MRPL37/MRPS17/NCK1/MRPS31/MRPL2/MRPS34/RRBP1/MRPS9/MRPS5/MRPL18/MRPL41/MRPL39/HSPA14/RBM3/MALSU1/MRPS36/NPM1/HBA1/RPL22/MRPL38/MRPS21/MRPL9/MRPL55/MRPL50/MRPL30/EIF3H/NDUFAB1/MRPL3/BTF3/MRPL17/MCTS1/MRPL45/RPL37/RPS6/RPL3/MRPS35/RPS4X/MPV17L2/RPL11/MRPS23/MRPS18C/RPL6/MRPL24/MRPL47/RPL7/RPL26L1/MRPL21/APEX1/PNPT1/MRPL44/RPS23/MRPL27/RPL36AL/…
GO_SMALL_RIBOSOMAL_SUBUNIT	GO_SMALL_RIBOSOMAL_SUBUNIT	71	-0.653587	-1.46628	0.0294118	1	1	18327	tags=86%, list=31%, signal=59%	MRPS24/MRPS10/MRPS14/DAP3/MRPS17/MRPS31/MRPS34/MRPS9/MRPS5/MRPS36/NPM1/HBA1/MRPS21/MCTS1/RPS6/MRPS35/RPS4X/MRPS18C/RPS23/RPS25/MRPS22/MRPS7/RPS13/MRPS26/RPS24/RPS2/MRPS18A/RPS12/UBA52/EIF2D/RPS14/MRPL42/RPS20/RPS27/MRPS11/RPS15/RPS26/RPS11/MRPS28/RPS27A/RPS8/RPS9/RPS3/RPS10/RPS28/RPS3A/MRPS15/RPS18/RPS17/RPS21/RPSA/RPS5/RPS15A/RPS16/RPS7/RPS19/MRPS12/RPS27L/RPS29/RPS4Y1/RPS4Y2
GO_VENTRICULAR_SEPTUM_DEVELOPMENT	GO_VENTRICULAR_SEPTUM_DEVELOPMENT	71	-0.603367	-1.35362	0.0294118	1	1	439	tags=3%, list=1%, signal=3%	XIRP2/MIR1-1
GO_VESICLE_MEDIATED_TRANSPORT_IN_SYNAPSE	GO_VESICLE_MEDIATED_TRANSPORT_IN_SYNAPSE	212	0.543457	1.3043	0.0294118	1	1	19014	tags=45%, list=33%, signal=31%	UNC13C/DRD1/PCLO/SLC32A1/PPFIA2/SLC17A6/PACSIN1/SYT9/CALY/SYT2/RIMS1/CPLX4/SYT4/CHRM2/DOC2A/HTR2A/PRKCG/DRD3/OTOF/CPLX2/GRIP1/SYT5/GRIN3A/STXBP5L/RIMS2/SLC17A7/SYT1/CHRNB3/DOC2B/SLC17A8/ADRA1A/SNAP91/ACTL8/RAB3B/BSN/TH/BTBD8/P2RY4/SH3GL2/PRKCB/SYT7/RIMS3/SYN2/SNCB/HPCA/WNT3A/ERC2/GRIP2/SYN1/CHRNA4/CHRNB2/PRRT2/SNAP25/SYN3/SYT12/APBA1/STX1B/CPLX1/NRXN1/NAPB/AMPH/CADPS2/SNCA/CHRNA6/RAB27B/UNC13A/RA…
GO_PROTEIN_CHROMOPHORE_LINKAGE	GO_PROTEIN_CHROMOPHORE_LINKAGE	14	0.844654	1.47616	0.0298507	1	1	5243	tags=36%, list=9%, signal=33%	OPN1LW/OPN4/AMBP/OPN1MW/RHO
GO_ACTIVATION_OF_CYSTEINE_TYPE_ENDOPEPTIDASE_ACTIVITY_INVOLVED_IN_APOPTOTIC_PROCESS	GO_ACTIVATION_OF_CYSTEINE_TYPE_ENDOPEPTIDASE_ACTIVITY_INVOLVED_IN_APOPTOTIC_PROCESS	86	-0.595245	-1.3722	0.030303	1	1	501	tags=2%, list=1%, signal=2%	XDH/MIR15A
GO_ORGANELLAR_RIBOSOME	GO_ORGANELLAR_RIBOSOME	86	-0.626078	-1.44327	0.030303	1	1	19332	tags=85%, list=33%, signal=57%	MRPL28/MRPL35/MRPL10/MRPS2/MTG1/MRPS18B/MRPL49/MRPS24/MRPL23/MRPS10/MRPS14/DAP3/MRPL57/MRPL37/MRPS17/MRPS31/MRPL2/MRPS34/MRPS9/MRPS5/MRPL18/MRPL41/MRPL39/MALSU1/MRPS36/MRPL38/MRPS21/MRPL9/MRPL55/MRPL50/MRPL30/NDUFAB1/MRPL3/MRPL17/MRPL45/MRPS35/MPV17L2/MRPS18C/MRPL24/MRPL47/MRPL21/MRPL44/MRPL27/MRPS22/CHCHD1/MRPL14/MRPL16/MRPS7/MRPS26/MRPL51/MRPS18A/MRPL42/MRPL34/MRPL32/MRPL43/MRPS11/MRPL22/MRPL4/…
GO_INTRACELLULAR_ESTROGEN_RECEPTOR_SIGNALING_PATHWAY	GO_INTRACELLULAR_ESTROGEN_RECEPTOR_SIGNALING_PATHWAY	53	0.720103	1.49232	0.0307692	1	1	3327	tags=6%, list=6%, signal=5%	DEFA1/DEFA1B/POU4F2
GO_MRNA_CIS_SPLICING_VIA_SPLICEOSOME	GO_MRNA_CIS_SPLICING_VIA_SPLICEOSOME	34	0.763681	1.47361	0.0307692	1	1	6180	tags=6%, list=11%, signal=5%	RBMY1F/NCBP2L
GO_PHOTORECEPTOR_DISC_MEMBRANE	GO_PHOTORECEPTOR_DISC_MEMBRANE	23	0.766191	1.43665	0.0307692	1	1	8344	tags=39%, list=14%, signal=34%	OPN1LW/GUCA1C/OPN4/OPN1MW/RHO/GRK1/GUCA1A/GNAT1/GUCY2F
GO_VOLTAGE_GATED_ION_CHANNEL_ACTIVITY	GO_VOLTAGE_GATED_ION_CHANNEL_ACTIVITY	196	0.57177	1.35277	0.0307692	1	1	16706	tags=49%, list=29%, signal=35%	KCNV1/OPRM1/KCNS2/CALHM1/HCN1/KCNK18/SCN10A/KCNB2/CACNG3/CACNA1B/KCNK16/GRIN2B/KCNC2/CACNG2/KCNJ3/GRIN2A/KCNT1/KCNH1/KCNA4/CACNA1S/GRIN1/KCNG3/LRRC38/KCNH6/LRRC26/CACNA1I/KCNS1/KCNH5/CACNA1E/KCNK12/KCNK4/LRRC52/KCNH7/KCNJ12/SCN9A/KCNK9/TMC1/CLIC5/CLCNKA/KCNJ1/KCNA3/KCNA5/KCNJ13/GRIN3A/KCNE5/CLCNKB/CACNA2D3/KCNA1/SCN2B/CACNA1F/HCN4/KCNG4/SLC17A3/TMC2/GRIN2C/CACNA2D2/KCNB1/SCN3B/KCNJ4/KCNJ6/KCNC4/K…
GO_POSITIVE_REGULATION_OF_HEART_GROWTH	GO_POSITIVE_REGULATION_OF_HEART_GROWTH	52	0.748487	1.53751	0.03125	1	1	638	tags=6%, list=1%, signal=6%	MIR509-2/MIR208A/MIR509-1
GO_POSITIVE_REGULATION_OF_NECROTIC_CELL_DEATH	GO_POSITIVE_REGULATION_OF_NECROTIC_CELL_DEATH	12	0.82955	1.40449	0.03125	1	1	485	tags=8%, list=1%, signal=8%	MIR107
GO_CELL_DEATH_IN_RESPONSE_TO_HYDROGEN_PEROXIDE	GO_CELL_DEATH_IN_RESPONSE_TO_HYDROGEN_PEROXIDE	33	0.763322	1.47818	0.031746	1	1	723	tags=3%, list=1%, signal=3%	MIR133A2
GO_NEGATIVE_REGULATION_OF_ADENYLATE_CYCLASE_ACTIVATING_G_PROTEIN_COUPLED_RECEPTOR_SIGNALING_PATHWAY	GO_NEGATIVE_REGULATION_OF_ADENYLATE_CYCLASE_ACTIVATING_G_PROTEIN_COUPLED_RECEPTOR_SIGNALING_PATHWAY	11	0.869861	1.43902	0.031746	1	1	2682	tags=27%, list=5%, signal=26%	MIR133A2/SSTR4/OPRM1
GO_NEGATIVE_REGULATION_OF_LEUKOCYTE_ADHESION_TO_VASCULAR_ENDOTHELIAL_CELL	GO_NEGATIVE_REGULATION_OF_LEUKOCYTE_ADHESION_TO_VASCULAR_ENDOTHELIAL_CELL	11	0.877336	1.45138	0.031746	1	1	132	tags=9%, list=0%, signal=9%	MIR31
GO_REGULATION_OF_ENDOTHELIAL_CELL_CHEMOTAXIS	GO_REGULATION_OF_ENDOTHELIAL_CELL_CHEMOTAXIS	24	0.792585	1.46914	0.031746	1	1	4078	tags=8%, list=7%, signal=8%	MIR424/FGF16
GO_NEGATIVE_REGULATION_OF_CALCIUM_MEDIATED_SIGNALING	GO_NEGATIVE_REGULATION_OF_CALCIUM_MEDIATED_SIGNALING	32	0.771642	1.479	0.0327869	1	1	2558	tags=6%, list=4%, signal=6%	MIR133A2/TRDN
GO_PRESYNAPSE	GO_PRESYNAPSE	497	0.484825	1.25566	0.0410959	1	1	17714	tags=37%, list=30%, signal=26%	OR56A1/OR56A5/SYT10/SLC6A5/CDH9/CNGB1/OPRM1/UNC13C/DRD1/SV2B/SCN10A/ATP2B3/PCLO/CACNA1B/CRHR2/KCNC2/KCNJ3/GRIN2A/SVOP/KCNH1/HRH3/SLC32A1/GABRA5/GAD2/HTR3A/NOS1/PPFIA2/GRIN1/SLC17A6/KCTD16/GLRA1/PACSIN1/SV2C/GRM2/SYNPR/SYT9/SYT2/CALB1/CHRM1/SLC6A17/RIMS1/CPLX4/SLC6A2/RAB3C/CNTN5/SYT4/SCGN/CHRM2/DOC2A/KCNK9/CALB2/PDYN/HTR2A/PRKCG/DRD3/GABRA2/OTOF/KCNA3/SYNGR4/HCRT/CPLX2/SLC30A3/SYT5/RIMS2/SLC17A7/S…
GO_CELLULAR_RESPONSE_TO_DRUG	GO_CELLULAR_RESPONSE_TO_DRUG	420	0.495049	1.25435	0.0422535	1	1	7548	tags=9%, list=13%, signal=8%	DEFB104B/MIR107/MIR133A2/OR56A1/OR10H4/OR10H3/OR5T3/OR56A5/HTR3B/HTR1A/HTR1E/REN/UGT1A1/DRD5/OPRM1/OR10H5/HTR5A/DRD1/HTR2C/METTL21C/RYR2/KCNC2/HRH3/HTR6/HTR3A/CACNA1S/OR10H2/GLRA1/CALY/CHRM1/CHRM2/OR10J5/HTR2A/STAR/DRD3/LY6G6D/HTR1D
GO_CERAMIDE_CATABOLIC_PROCESS	GO_CERAMIDE_CATABOLIC_PROCESS	20	0.810096	1.47203	0.0441176	1	1	3831	tags=10%, list=7%, signal=9%	NEU2/GBA3
GO_POSITIVE_REGULATION_OF_CELL_MIGRATION_INVOLVED_IN_SPROUTING_ANGIOGENESIS	GO_POSITIVE_REGULATION_OF_CELL_MIGRATION_INVOLVED_IN_SPROUTING_ANGIOGENESIS	36	0.745261	1.46524	0.0447761	1	1	6798	tags=14%, list=12%, signal=12%	MIR31/MIR487B/MIR101-1/MIRLET7F2/MIRLET7F1
GO_POSITIVE_REGULATION_OF_VASCULAR_ENDOTHELIAL_GROWTH_FACTOR_RECEPTOR_SIGNALING_PATHWAY	GO_POSITIVE_REGULATION_OF_VASCULAR_ENDOTHELIAL_GROWTH_FACTOR_RECEPTOR_SIGNALING_PATHWAY	19	0.787578	1.41127	0.0447761	1	1	451	tags=5%, list=1%, signal=5%	MIR1224
GO_REGULATION_OF_CAMP_DEPENDENT_PROTEIN_KINASE_ACTIVITY	GO_REGULATION_OF_CAMP_DEPENDENT_PROTEIN_KINASE_ACTIVITY	21	0.816412	1.53112	0.0461538	1	1	723	tags=5%, list=1%, signal=5%	MIR133A2
GO_CELLULAR_CARBOHYDRATE_CATABOLIC_PROCESS	GO_CELLULAR_CARBOHYDRATE_CATABOLIC_PROCESS	41	0.724921	1.45766	0.047619	1	1	4193	tags=7%, list=7%, signal=7%	NEU2/GBA3/GK2
GO_NEGATIVE_REGULATION_OF_CAMP_MEDIATED_SIGNALING	GO_NEGATIVE_REGULATION_OF_CAMP_MEDIATED_SIGNALING	25	0.768662	1.44772	0.047619	1	1	2682	tags=12%, list=5%, signal=11%	MIR133A2/SSTR4/OPRM1
GO_REGULATION_OF_RESPONSE_TO_REACTIVE_OXYGEN_SPECIES	GO_REGULATION_OF_RESPONSE_TO_REACTIVE_OXYGEN_SPECIES	41	0.718595	1.44494	0.047619	1	1	723	tags=2%, list=1%, signal=2%	MIR133A2
GO_NEGATIVE_REGULATION_OF_CELLULAR_RESPONSE_TO_DRUG	GO_NEGATIVE_REGULATION_OF_CELLULAR_RESPONSE_TO_DRUG	26	0.750626	1.40081	0.0483871	1	1	723	tags=4%, list=1%, signal=4%	MIR133A2
GO_POSITIVE_REGULATION_OF_CELLULAR_AMIDE_METABOLIC_PROCESS	GO_POSITIVE_REGULATION_OF_CELLULAR_AMIDE_METABOLIC_PROCESS	150	-0.573984	-1.46323	0.0487805	1	1	4668	tags=5%, list=8%, signal=5%	IFNG/LIN28A/DAZ3/DAZ2/DAZL/DAZ4/DAZ1/MIR15B
GO_POSITIVE_REGULATION_OF_TRANSLATIONAL_INITIATION	GO_POSITIVE_REGULATION_OF_TRANSLATIONAL_INITIATION	30	-0.769974	-1.5555	0.0487805	1	1	3992	tags=20%, list=7%, signal=19%	BOLL/DAZ3/DAZ2/DAZL/DAZ4/DAZ1
GO_POSITIVE_REGULATION_OF_VASCULAR_ASSOCIATED_SMOOTH_MUSCLE_CELL_APOPTOTIC_PROCESS	GO_POSITIVE_REGULATION_OF_VASCULAR_ASSOCIATED_SMOOTH_MUSCLE_CELL_APOPTOTIC_PROCESS	10	-0.883817	-1.55082	0.0487805	1	1	439	tags=20%, list=1%, signal=20%	MIR24-2/MIR1-1

## Sheet: PAK7
ID	Description	setSize	enrichmentScore	NES	pvalue	p.adjust	qvalues	rank	leading_edge	core_enrichment
GO_TRANSLATIONAL_INITIATION	GO_TRANSLATIONAL_INITIATION	190	0.720469	1.6323	0.0113636	1	1	2559	tags=3%, list=4%, signal=3%	DAZ4/DAZ3/DAZ1/DAZ2/EIF4E1B
GO_TRANSLATION_REGULATOR_ACTIVITY_NUCLEIC_ACID_BINDING	GO_TRANSLATION_REGULATOR_ACTIVITY_NUCLEIC_ACID_BINDING	105	0.722164	1.55675	0.0114943	1	1	2559	tags=5%, list=4%, signal=5%	DAZ4/DAZ3/DAZ1/DAZ2/EIF4E1B
GO_REGULATION_OF_MRNA_SPLICING_VIA_SPLICEOSOME	GO_REGULATION_OF_MRNA_SPLICING_VIA_SPLICEOSOME	102	0.702302	1.49283	0.0116279	1	1	8210	tags=13%, list=14%, signal=11%	RBMY1F/MYOD1/SRRM4/KHDRBS2/RBFOX1/RBFOX3/CELF4/HMX2/CELF5/STH/CELF3/RBM11/CELF6
GO_MRNA_3_UTR_BINDING	GO_MRNA_3_UTR_BINDING	90	0.672745	1.41369	0.0119048	1	1	7436	tags=9%, list=13%, signal=8%	DAZ4/DAZ3/DAZ1/DAZ2/APOBEC1/ELAVL2/ELAVL4/PABPC5
GO_NEGATIVE_REGULATION_OF_MRNA_METABOLIC_PROCESS	GO_NEGATIVE_REGULATION_OF_MRNA_METABOLIC_PROCESS	79	0.728107	1.47642	0.0121951	1	1	7360	tags=11%, list=13%, signal=10%	DAZ4/DAZ3/DAZ1/DAZ2/APOBEC1/CELF4/GDNF/VIP/PKP1
GO_REGULATION_OF_TRANSLATIONAL_INITIATION	GO_REGULATION_OF_TRANSLATIONAL_INITIATION	79	0.798991	1.62015	0.0121951	1	1	2192	tags=5%, list=4%, signal=5%	DAZ4/DAZ3/DAZ1/DAZ2
GO_POSITIVE_REGULATION_OF_BLOOD_VESSEL_ENDOTHELIAL_CELL_MIGRATION	GO_POSITIVE_REGULATION_OF_BLOOD_VESSEL_ENDOTHELIAL_CELL_MIGRATION	76	0.720436	1.44621	0.0123457	1	1	299	tags=4%, list=1%, signal=4%	MIR487B/MIRLET7F2/MIR31
GO_NEGATIVE_REGULATION_OF_LONG_TERM_SYNAPTIC_POTENTIATION	GO_NEGATIVE_REGULATION_OF_LONG_TERM_SYNAPTIC_POTENTIATION	13	0.92449	1.55851	0.0128205	1	1	45	tags=8%, list=0%, signal=8%	MIR30B
GO_NLRP3_INFLAMMASOME_COMPLEX_ASSEMBLY	GO_NLRP3_INFLAMMASOME_COMPLEX_ASSEMBLY	14	0.903244	1.54564	0.0128205	1	1	190	tags=7%, list=0%, signal=7%	PYDC2
GO_TRANSLATION_ACTIVATOR_ACTIVITY	GO_TRANSLATION_ACTIVATOR_ACTIVITY	13	0.916037	1.54426	0.0128205	1	1	2192	tags=31%, list=4%, signal=30%	DAZ4/DAZ3/DAZ1/DAZ2
GO_NEGATIVE_REGULATION_OF_RNA_CATABOLIC_PROCESS	GO_NEGATIVE_REGULATION_OF_RNA_CATABOLIC_PROCESS	57	0.741174	1.43282	0.012987	1	1	7360	tags=14%, list=13%, signal=12%	DAZ4/DAZ3/DAZ1/DAZ2/APOBEC1/GDNF/VIP/PKP1
GO_3_UTR_MEDIATED_MRNA_STABILIZATION	GO_3_UTR_MEDIATED_MRNA_STABILIZATION	21	0.900104	1.5407	0.0131579	1	1	2192	tags=19%, list=4%, signal=18%	DAZ4/DAZ3/DAZ1/DAZ2
GO_MODIFICATION_BY_SYMBIONT_OF_HOST_MORPHOLOGY_OR_PHYSIOLOGY	GO_MODIFICATION_BY_SYMBIONT_OF_HOST_MORPHOLOGY_OR_PHYSIOLOGY	43	0.798154	1.47296	0.0131579	1	1	1631	tags=5%, list=3%, signal=5%	DEFA1/DEFA1B
GO_NEGATIVE_REGULATION_OF_TOR_SIGNALING	GO_NEGATIVE_REGULATION_OF_TOR_SIGNALING	40	0.800818	1.47014	0.0131579	1	1	235	tags=2%, list=0%, signal=2%	MIRLET7F2
GO_POSITIVE_REGULATION_OF_CELL_MIGRATION_INVOLVED_IN_SPROUTING_ANGIOGENESIS	GO_POSITIVE_REGULATION_OF_CELL_MIGRATION_INVOLVED_IN_SPROUTING_ANGIOGENESIS	36	0.816425	1.48238	0.0131579	1	1	299	tags=8%, list=1%, signal=8%	MIR487B/MIRLET7F2/MIR31
GO_U2_SNRNP	GO_U2_SNRNP	21	0.884897	1.51467	0.0131579	1	1	1823	tags=5%, list=3%, signal=5%	RBMY1E
GO_NEGATIVE_REGULATION_OF_AMYLOID_PRECURSOR_PROTEIN_CATABOLIC_PROCESS	GO_NEGATIVE_REGULATION_OF_AMYLOID_PRECURSOR_PROTEIN_CATABOLIC_PROCESS	16	0.88186	1.47827	0.0133333	1	1	713	tags=6%, list=1%, signal=6%	MIR107
GO_POSITIVE_REGULATION_OF_TRANSLATIONAL_INITIATION	GO_POSITIVE_REGULATION_OF_TRANSLATIONAL_INITIATION	30	0.887698	1.5856	0.0135135	1	1	2192	tags=13%, list=4%, signal=13%	DAZ4/DAZ3/DAZ1/DAZ2
GO_IRON_SULFUR_CLUSTER_ASSEMBLY	GO_IRON_SULFUR_CLUSTER_ASSEMBLY	19	0.910723	1.50082	0.0138889	1	1	1135	tags=5%, list=2%, signal=5%	BOLA2
GO_REGULATION_OF_MRNA_METABOLIC_PROCESS	GO_REGULATION_OF_MRNA_METABOLIC_PROCESS	318	0.583053	1.38789	0.0212766	1	1	8854	tags=7%, list=15%, signal=6%	DAZ4/DAZ3/RBMY1F/DAZ1/DAZ2/APOBEC1/MYOD1/SRRM4/KHDRBS2/RBFOX1/RBFOX3/CELF4/HMX2/CELF5/STH/CELF3/SCGB1A1/GDNF/VIP/PKP1/RBM11/CELF6/NANOS2
GO_REGULATION_OF_MRNA_PROCESSING	GO_REGULATION_OF_MRNA_PROCESSING	140	0.629001	1.39592	0.0238095	1	1	8210	tags=9%, list=14%, signal=8%	RBMY1F/MYOD1/SRRM4/KHDRBS2/RBFOX1/RBFOX3/CELF4/HMX2/CELF5/STH/CELF3/RBM11/CELF6
GO_REGULATION_OF_RNA_SPLICING	GO_REGULATION_OF_RNA_SPLICING	138	0.643014	1.42707	0.0238095	1	1	8210	tags=11%, list=14%, signal=9%	RBMY1F/MYOD1/ESRP1/SRRM4/AFF2/KHDRBS2/RBFOX1/RBFOX3/CELF4/HMX2/CELF5/STH/CELF3/RBM11/CELF6
GO_TRANSLATION_REGULATOR_ACTIVITY	GO_TRANSLATION_REGULATOR_ACTIVITY	135	0.6211	1.37312	0.0238095	1	1	2559	tags=4%, list=4%, signal=4%	DAZ4/DAZ3/DAZ1/DAZ2/EIF4E1B
GO_ALTERNATIVE_MRNA_SPLICING_VIA_SPLICEOSOME	GO_ALTERNATIVE_MRNA_SPLICING_VIA_SPLICEOSOME	78	0.689163	1.38229	0.025	1	1	8210	tags=13%, list=14%, signal=11%	RBMY1F/MYOD1/SRRM4/RBFOX1/RBFOX3/CELF4/CELF5/CELF3/RBM11/CELF6
GO_POSITIVE_REGULATION_OF_SPROUTING_ANGIOGENESIS	GO_POSITIVE_REGULATION_OF_SPROUTING_ANGIOGENESIS	62	0.700486	1.38235	0.0253165	1	1	668	tags=8%, list=1%, signal=8%	MIR30B/MIR487B/MIRLET7F2/MIR31/MIR1224
GO_RNA_STABILIZATION	GO_RNA_STABILIZATION	47	0.760099	1.41303	0.025641	1	1	6803	tags=15%, list=12%, signal=13%	DAZ4/DAZ3/DAZ1/DAZ2/APOBEC1/GDNF/VIP
GO_NEGATIVE_REGULATION_OF_EXCITATORY_POSTSYNAPTIC_POTENTIAL	GO_NEGATIVE_REGULATION_OF_EXCITATORY_POSTSYNAPTIC_POTENTIAL	11	0.859314	1.4151	0.0266667	1	1	5453	tags=27%, list=9%, signal=25%	MIR30B/CBLN1/CELF4
GO_PROTEIN_MATURATION_BY_IRON_SULFUR_CLUSTER_TRANSFER	GO_PROTEIN_MATURATION_BY_IRON_SULFUR_CLUSTER_TRANSFER	11	0.929438	1.53057	0.0266667	1	1	1135	tags=9%, list=2%, signal=9%	BOLA2
GO_SYNAPTIC_MEMBRANE	GO_SYNAPTIC_MEMBRANE	429	0.535106	1.29709	0.0306122	1	1	15544	tags=37%, list=27%, signal=27%	GLRA3/HTR3B/CACNG2/SLC1A6/SLC6A5/CBLN1/CDH9/HTR5A/GLRA1/RIMS2/CHRNA2/GRIN2B/SCN10A/GRM5/GABRA6/UNC13C/KCTD16/SHANK2/NETO1/OPRM1/CHRNB3/CHRNA4/KCNC2/CACNG3/CHRM2/CHRM1/KCNJ3/GABRG1/RIMS1/CDH8/DLGAP2/GABRA3/SLITRK1/LRFN2/GRIN1/IL1RAPL1/GABRA4/SNAP91/GABRB3/GRM7/GABRA5/GABRG2/GRM2/SHISA7/GRM1/GABRB2/SLC6A3/GABRA1/GABRP/ADRA2C/KCNH1/LRRC7/CABP1/DRD1/SLC8A3/IQSEC3/GAD2/HTR2A/GRID2/LRRTM4/SHANK1/GRIN2A…
GO_HORMONE_MEDIATED_SIGNALING_PATHWAY	GO_HORMONE_MEDIATED_SIGNALING_PATHWAY	227	0.589751	1.38512	0.0322581	1	1	9375	tags=14%, list=16%, signal=12%	MIR208A/CGB1/DEFA1/DEFA1B/POU4F2/FSHB/SSTR1/SSTR4/CST11/NR0B1/SSTR5/SSTR3/CRHR2/TSHR/FSHR/LHCGR/PTH/GCGR/TSHB/FOXA1/RXFP1/NR5A1/UCN3/CRHR1/GRIP1/RXFP2/SSTR2/RXRG/SCGB2A1/PGR/SST/LGR5
GO_CHAPERONE_MEDIATED_PROTEIN_COMPLEX_ASSEMBLY	GO_CHAPERONE_MEDIATED_PROTEIN_COMPLEX_ASSEMBLY	19	-0.79155	-1.52966	0.0333333	1	1	838	tags=11%, list=1%, signal=10%	HOPX/APCS
GO_REGULATION_OF_VENTRICULAR_CARDIAC_MUSCLE_CELL_ACTION_POTENTIAL	GO_REGULATION_OF_VENTRICULAR_CARDIAC_MUSCLE_CELL_ACTION_POTENTIAL	18	-0.790176	-1.48681	0.0333333	1	1	440	tags=17%, list=1%, signal=17%	DSG2/MIR133A2/MIR1-1
GO_CELL_DEATH_IN_RESPONSE_TO_HYDROGEN_PEROXIDE	GO_CELL_DEATH_IN_RESPONSE_TO_HYDROGEN_PEROXIDE	33	-0.785015	-1.67429	0.0344828	1	1	440	tags=6%, list=1%, signal=6%	IL10/MIR133A2
GO_MEMBRANE_REPOLARIZATION_DURING_VENTRICULAR_CARDIAC_MUSCLE_CELL_ACTION_POTENTIAL	GO_MEMBRANE_REPOLARIZATION_DURING_VENTRICULAR_CARDIAC_MUSCLE_CELL_ACTION_POTENTIAL	17	-0.815371	-1.49178	0.0344828	1	1	440	tags=18%, list=1%, signal=18%	KCNE1/MIR133A2/MIR1-1
GO_NEGATIVE_REGULATION_OF_CELLULAR_RESPONSE_TO_DRUG	GO_NEGATIVE_REGULATION_OF_CELLULAR_RESPONSE_TO_DRUG	26	-0.751301	-1.43795	0.0344828	1	1	440	tags=8%, list=1%, signal=8%	IL10/MIR133A2
GO_CONNECTIVE_TISSUE_REPLACEMENT	GO_CONNECTIVE_TISSUE_REPLACEMENT	20	-0.758827	-1.41488	0.0357143	1	1	2774	tags=15%, list=5%, signal=14%	MIR199A1/MIR199A2/MIR15B
GO_MHC_PROTEIN_COMPLEX	GO_MHC_PROTEIN_COMPLEX	20	-0.739063	-1.37803	0.0357143	1	1	14796	tags=95%, list=25%, signal=71%	CD74/HLA-E/HLA-DOB/HLA-DOA/HLA-DPA1/HLA-DRB1/HLA-DRA/HLA-DMA/HLA-DPB1/HLA-DMB/HLA-DRB5/B2M/HLA-DQA1/HLA-DQB1/HLA-F/MR1/HLA-DQA2/HLA-H/HLA-G
GO_NEGATIVE_REGULATION_OF_MUSCLE_HYPERTROPHY	GO_NEGATIVE_REGULATION_OF_MUSCLE_HYPERTROPHY	38	-0.735668	-1.62535	0.0357143	1	1	2774	tags=11%, list=5%, signal=10%	MIR199A1/MIR199A2/MIR133A2/MIR1-1
GO_NEGATIVE_REGULATION_OF_NECROTIC_CELL_DEATH	GO_NEGATIVE_REGULATION_OF_NECROTIC_CELL_DEATH	20	-0.784721	-1.46316	0.0357143	1	1	2863	tags=15%, list=5%, signal=14%	MIR221/MIR101-2/MIR485
GO_POSITIVE_REGULATION_OF_ENDOTHELIAL_CELL_APOPTOTIC_PROCESS	GO_POSITIVE_REGULATION_OF_ENDOTHELIAL_CELL_APOPTOTIC_PROCESS	23	-0.865797	-1.60474	0.0357143	1	1	510	tags=13%, list=1%, signal=13%	MIR132/MIR375/MIR15A
GO_POSITIVE_REGULATION_OF_VASCULAR_ASSOCIATED_SMOOTH_MUSCLE_CELL_APOPTOTIC_PROCESS	GO_POSITIVE_REGULATION_OF_VASCULAR_ASSOCIATED_SMOOTH_MUSCLE_CELL_APOPTOTIC_PROCESS	10	-0.921995	-1.60951	0.0357143	1	1	314	tags=20%, list=1%, signal=20%	MIR140/MIR1-1
GO_REGULATION_OF_CARDIAC_MUSCLE_CONTRACTION_BY_REGULATION_OF_THE_RELEASE_OF_SEQUESTERED_CALCIUM_ION	GO_REGULATION_OF_CARDIAC_MUSCLE_CONTRACTION_BY_REGULATION_OF_THE_RELEASE_OF_SEQUESTERED_CALCIUM_ION	23	-0.841368	-1.55946	0.0357143	1	1	440	tags=13%, list=1%, signal=13%	CAMK2D/MIR133A2/MIR1-1
GO_REGULATION_OF_SKELETAL_MUSCLE_CELL_DIFFERENTIATION	GO_REGULATION_OF_SKELETAL_MUSCLE_CELL_DIFFERENTIATION	20	-0.735789	-1.37192	0.0357143	1	1	314	tags=10%, list=1%, signal=10%	TBX1/MIR1-1
GO_NEGATIVE_REGULATION_OF_STRIATED_MUSCLE_CELL_APOPTOTIC_PROCESS	GO_NEGATIVE_REGULATION_OF_STRIATED_MUSCLE_CELL_APOPTOTIC_PROCESS	39	-0.687803	-1.53352	0.037037	1	1	2774	tags=15%, list=5%, signal=15%	PAX8/MIR19B2/NKX2-5/MIR199A1/MIR199A2/MIR133A2
GO_POSITIVE_REGULATION_OF_EPITHELIAL_CELL_APOPTOTIC_PROCESS	GO_POSITIVE_REGULATION_OF_EPITHELIAL_CELL_APOPTOTIC_PROCESS	37	-0.840987	-1.79747	0.037037	1	1	510	tags=8%, list=1%, signal=8%	MIR132/MIR375/MIR15A
GO_G_PROTEIN_COUPLED_RECEPTOR_SIGNALING_PATHWAY_INVOLVED_IN_HEART_PROCESS	GO_G_PROTEIN_COUPLED_RECEPTOR_SIGNALING_PATHWAY_INVOLVED_IN_HEART_PROCESS	15	-0.839315	-1.49691	0.0384615	1	1	440	tags=27%, list=1%, signal=26%	RGS2/CAV1/MIR133A2/MIR1-1
GO_NEGATIVE_REGULATION_OF_ACTION_POTENTIAL	GO_NEGATIVE_REGULATION_OF_ACTION_POTENTIAL	12	-0.891784	-1.5238	0.0384615	1	1	440	tags=25%, list=1%, signal=25%	KCNE3/MIR133A2/MIR1-1
GO_NEGATIVE_REGULATION_OF_PHOSPHATIDYLINOSITOL_3_KINASE_SIGNALING	GO_NEGATIVE_REGULATION_OF_PHOSPHATIDYLINOSITOL_3_KINASE_SIGNALING	15	-0.929251	-1.65731	0.0384615	1	1	123	tags=13%, list=0%, signal=13%	CRYBA1/MIR449A
GO_NEGATIVE_REGULATION_OF_RESPONSE_TO_DRUG	GO_NEGATIVE_REGULATION_OF_RESPONSE_TO_DRUG	35	-0.688767	-1.46883	0.0384615	1	1	440	tags=6%, list=1%, signal=6%	IL10/MIR133A2
GO_NEGATIVE_REGULATION_OF_VASCULAR_SMOOTH_MUSCLE_CELL_PROLIFERATION	GO_NEGATIVE_REGULATION_OF_VASCULAR_SMOOTH_MUSCLE_CELL_PROLIFERATION	36	-0.680332	-1.44546	0.0384615	1	1	440	tags=14%, list=1%, signal=14%	MIR4632/MIR133A2/MIR15A/MIR1-1/MIR638
GO_REGULATION_OF_CAMP_DEPENDENT_PROTEIN_KINASE_ACTIVITY	GO_REGULATION_OF_CAMP_DEPENDENT_PROTEIN_KINASE_ACTIVITY	21	-0.779097	-1.43511	0.0384615	1	1	440	tags=14%, list=1%, signal=14%	CXCL10/PKIB/MIR133A2
GO_REGULATION_OF_MEMBRANE_REPOLARIZATION	GO_REGULATION_OF_MEMBRANE_REPOLARIZATION	36	-0.683766	-1.45276	0.0384615	1	1	440	tags=8%, list=1%, signal=8%	KCNE1/MIR133A2/MIR1-1
GO_REGULATION_OF_MEMBRANE_REPOLARIZATION_DURING_ACTION_POTENTIAL	GO_REGULATION_OF_MEMBRANE_REPOLARIZATION_DURING_ACTION_POTENTIAL	12	-0.894434	-1.52832	0.0384615	1	1	440	tags=25%, list=1%, signal=25%	KCNE3/MIR133A2/MIR1-1
GO_REGULATION_OF_RESPONSE_TO_REACTIVE_OXYGEN_SPECIES	GO_REGULATION_OF_RESPONSE_TO_REACTIVE_OXYGEN_SPECIES	41	-0.736166	-1.65335	0.0384615	1	1	440	tags=5%, list=1%, signal=5%	IL10/MIR133A2
GO_RELEASE_OF_SEQUESTERED_CALCIUM_ION_INTO_CYTOSOL_BY_ENDOPLASMIC_RETICULUM	GO_RELEASE_OF_SEQUESTERED_CALCIUM_ION_INTO_CYTOSOL_BY_ENDOPLASMIC_RETICULUM	36	-0.699258	-1.48567	0.0384615	1	1	440	tags=8%, list=1%, signal=8%	FASLG/MIR133A2/MIR1-1
GO_SARCOPLASMIC_RETICULUM_CALCIUM_ION_TRANSPORT	GO_SARCOPLASMIC_RETICULUM_CALCIUM_ION_TRANSPORT	40	-0.68399	-1.51453	0.0384615	1	1	440	tags=8%, list=1%, signal=7%	CAMK2D/MIR133A2/MIR1-1
GO_INHIBITORY_EXTRACELLULAR_LIGAND_GATED_ION_CHANNEL_ACTIVITY	GO_INHIBITORY_EXTRACELLULAR_LIGAND_GATED_ION_CHANNEL_ACTIVITY	15	0.844875	1.44291	0.0394737	1	1	8268	tags=87%, list=14%, signal=74%	GLRA3/GLRA1/GABRA6/GABRG1/GABRA3/GABRA4/GABRA5/GABRG2/GABRB2/GABRA1/GABRG3/GLRA2/GABRA2
GO_INTRACELLULAR_ESTROGEN_RECEPTOR_SIGNALING_PATHWAY	GO_INTRACELLULAR_ESTROGEN_RECEPTOR_SIGNALING_PATHWAY	53	0.703583	1.34318	0.0394737	1	1	2338	tags=6%, list=4%, signal=5%	DEFA1/DEFA1B/POU4F2
GO_POSITIVE_REGULATION_OF_MRNA_SPLICING_VIA_SPLICEOSOME	GO_POSITIVE_REGULATION_OF_MRNA_SPLICING_VIA_SPLICEOSOME	22	0.797454	1.38098	0.0394737	1	1	6444	tags=18%, list=11%, signal=16%	CELF4/HMX2/STH/CELF3
GO_RESPONSE_TO_PROTOZOAN	GO_RESPONSE_TO_PROTOZOAN	27	0.766164	1.35484	0.0394737	1	1	1631	tags=7%, list=3%, signal=7%	DEFA1/DEFA1B
GO_CYTOSOLIC_LARGE_RIBOSOMAL_SUBUNIT	GO_CYTOSOLIC_LARGE_RIBOSOMAL_SUBUNIT	57	-0.57987	-1.40409	0.04	1	1	17495	tags=86%, list=30%, signal=60%	RPL6/RPL23/RPL38/RPL14/RPL29/RPL5/RPL30/RPL7/RPL19/RPL24/RPL4/RPL11/RPL37A/RPL36A/RPL3/RPL35A/RPL12/RPL34/RPL3L/RPL9/RPL13/RPL31/RPL27/RPL26/RPL21/RPL35/RPL10/RPL26L1/RPL10A/RPL8/RPL23A/UBA52/RPL18/RPLP2/RPL13A/RPL18A/RPLP0/RPLP1/RSL24D1/RPL39/RPL17/RPL36/RPL41/RPL27A/RPL36AL/RPLP0P6/RPL28/RPL39L/RPL10L
GO_NEGATIVE_REGULATION_OF_ERBB_SIGNALING_PATHWAY	GO_NEGATIVE_REGULATION_OF_ERBB_SIGNALING_PATHWAY	52	-0.61995	-1.46196	0.04	1	1	5301	tags=19%, list=9%, signal=18%	GPRC5A/SPRY2/EGFR/ERBB2/SPRY1/AREG/EGF/EREG/CBLC/MIR133A2
GO_NEGATIVE_REGULATION_OF_I_KAPPAB_KINASE_NF_KAPPAB_SIGNALING	GO_NEGATIVE_REGULATION_OF_I_KAPPAB_KINASE_NF_KAPPAB_SIGNALING	49	-0.740055	-1.70966	0.04	1	1	362	tags=6%, list=1%, signal=6%	TNIP3/MIR15A/MIR15B
GO_POSITIVE_REGULATION_OF_CELLULAR_RESPONSE_TO_TRANSFORMING_GROWTH_FACTOR_BETA_STIMULUS	GO_POSITIVE_REGULATION_OF_CELLULAR_RESPONSE_TO_TRANSFORMING_GROWTH_FACTOR_BETA_STIMULUS	29	0.784191	1.40484	0.04	1	1	45	tags=3%, list=0%, signal=3%	MIR30B
GO_REGULATION_OF_ACTIN_FILAMENT_BASED_MOVEMENT	GO_REGULATION_OF_ACTIN_FILAMENT_BASED_MOVEMENT	46	-0.634037	-1.41848	0.04	1	1	440	tags=7%, list=1%, signal=6%	DSG2/MIR133A2/MIR1-1
GO_REGULATION_OF_CARDIAC_MUSCLE_CONTRACTION_BY_CALCIUM_ION_SIGNALING	GO_REGULATION_OF_CARDIAC_MUSCLE_CONTRACTION_BY_CALCIUM_ION_SIGNALING	28	-0.810282	-1.62169	0.04	1	1	440	tags=11%, list=1%, signal=11%	CAMK2D/MIR133A2/MIR1-1
GO_VENTRICULAR_CARDIAC_MUSCLE_CELL_MEMBRANE_REPOLARIZATION	GO_VENTRICULAR_CARDIAC_MUSCLE_CELL_MEMBRANE_REPOLARIZATION	28	-0.74237	-1.48577	0.04	1	1	440	tags=11%, list=1%, signal=11%	KCNE1/MIR133A2/MIR1-1
GO_DENDRITIC_SPINE_MAINTENANCE	GO_DENDRITIC_SPINE_MAINTENANCE	20	0.807668	1.37763	0.0405405	1	1	3653	tags=15%, list=6%, signal=14%	MIR30B/GRIN2B/INS
GO_NEGATIVE_REGULATION_OF_NERVOUS_SYSTEM_PROCESS	GO_NEGATIVE_REGULATION_OF_NERVOUS_SYSTEM_PROCESS	25	0.789312	1.35096	0.0410959	1	1	5453	tags=16%, list=9%, signal=15%	MIR30B/CBLN1/GLRA1/CELF4
GO_NEGATIVE_REGULATION_OF_NIK_NF_KAPPAB_SIGNALING	GO_NEGATIVE_REGULATION_OF_NIK_NF_KAPPAB_SIGNALING	31	0.75389	1.33575	0.0410959	1	1	190	tags=3%, list=0%, signal=3%	PYDC2
GO_CHEMOKINE_ACTIVITY	GO_CHEMOKINE_ACTIVITY	47	-0.603992	-1.37577	0.0416667	1	1	10217	tags=62%, list=17%, signal=51%	CXCL13/CCL5/CCL15/CCL24/CCL8/CXCL9/CCL2/CXCL8/CXCL10/CXCL1/CXCL14/XCL2/PPBP/CCL18/CCL14/C10orf99/CXCL5/CXCL3/CCL23/CCL13/CXCL11/CCL7/XCL1/CCL20/PF4V1/CCL26/CXCL6/CCL27/CCL11
GO_CHEMOKINE_RECEPTOR_BINDING	GO_CHEMOKINE_RECEPTOR_BINDING	61	-0.58462	-1.42035	0.0416667	1	1	8980	tags=48%, list=15%, signal=40%	CCL24/CCL8/CXCL9/CCL2/CXCL8/CXCL10/CXCL1/CXCL14/XCL2/PPBP/CCL18/CCL14/C10orf99/CXCL5/CXCL3/CCR2/CCL23/CCL13/CXCL11/CCL7/XCL1/CCL20/PF4V1/CCL26/CXCL6/DEFB103B/CCL27/DEFB4A/CCL11
GO_LIGAND_GATED_ANION_CHANNEL_ACTIVITY	GO_LIGAND_GATED_ANION_CHANNEL_ACTIVITY	19	0.809048	1.33326	0.0416667	1	1	9122	tags=84%, list=16%, signal=71%	GLRA3/GLRA1/GABRA6/GABRG1/GABRA3/GABRA4/GABRB3/GABRA5/GABRG2/GABRB2/GABRA1/GABRG3/GLRA2/GABRA2/SLC17A7/CFTR
GO_MEMBRANE_REPOLARIZATION	GO_MEMBRANE_REPOLARIZATION	47	-0.613493	-1.39741	0.0416667	1	1	440	tags=6%, list=1%, signal=6%	KCNE1/MIR133A2/MIR1-1
GO_NEGATIVE_REGULATION_OF_VIRAL_GENOME_REPLICATION	GO_NEGATIVE_REGULATION_OF_VIRAL_GENOME_REPLICATION	58	-0.602009	-1.45199	0.0416667	1	1	11681	tags=60%, list=20%, signal=48%	MX1/IFI16/ZC3HAV1/RSAD2/EIF2AK4/AEN/OAS3/IFITM1/IFITM2/PARP10/OAS2/CCL5/LTF/APOBEC3H/OASL/BST2/IFITM3/CCL8/OAS1/APOBEC3C/PLSCR1/ZC3H12A/SLPI/TRIM6/ISG20/APOBEC3G/APOBEC3F/APOBEC3B/AICDA/MIR221/IFNB1/APOBEC3D/MIR222/APOBEC3A/HMGA2
GO_PLATELET_DERIVED_GROWTH_FACTOR_RECEPTOR_SIGNALING_PATHWAY	GO_PLATELET_DERIVED_GROWTH_FACTOR_RECEPTOR_SIGNALING_PATHWAY	58	-0.614049	-1.48103	0.0416667	1	1	9	tags=14%, list=0%, signal=14%	IQGAP1/PDGFA/PTGIR/LOX/PDGFD/PDGFRL/MIR221/MIR638
GO_POSITIVE_REGULATION_OF_INTRINSIC_APOPTOTIC_SIGNALING_PATHWAY	GO_POSITIVE_REGULATION_OF_INTRINSIC_APOPTOTIC_SIGNALING_PATHWAY	58	-0.663887	-1.60124	0.0416667	1	1	362	tags=10%, list=1%, signal=10%	NKX3-1/S100A8/IL20RA/LCK/PLEKHF1/MIR15A
GO_REGULATION_OF_ENDOTHELIAL_CELL_CHEMOTAXIS	GO_REGULATION_OF_ENDOTHELIAL_CELL_CHEMOTAXIS	24	0.77872	1.33969	0.0416667	1	1	4677	tags=12%, list=8%, signal=12%	MIR424/FGF4/MIR16-2
GO_POSTSYNAPTIC_MEMBRANE	GO_POSTSYNAPTIC_MEMBRANE	324	0.542557	1.28631	0.0430108	1	1	15544	tags=37%, list=27%, signal=28%	GLRA3/HTR3B/CACNG2/CBLN1/CDH9/HTR5A/GLRA1/CHRNA2/GRIN2B/GRM5/GABRA6/KCTD16/SHANK2/NETO1/OPRM1/CHRNB3/CHRNA4/KCNC2/CACNG3/CHRM2/CHRM1/GABRG1/DLGAP2/GABRA3/SLITRK1/LRFN2/GRIN1/IL1RAPL1/GABRA4/GABRB3/GRM7/GABRA5/GABRG2/GRM2/SHISA7/GRM1/GABRB2/SLC6A3/GABRA1/GABRP/ADRA2C/KCNH1/LRRC7/CABP1/DRD1/SLC8A3/IQSEC3/HTR2A/GRID2/LRRTM4/SHANK1/GRIN2A/GRIP1/DLGAP3/OPRD1/LRRTM1/KCNB1/CHRNA3/GRIN3A/GABRG3/GLRA2/GAB…
GO_TRANSPORTER_COMPLEX	GO_TRANSPORTER_COMPLEX	324	0.54266	1.28656	0.0430108	1	1	16410	tags=43%, list=28%, signal=31%	GLRA3/KCNB2/CLDN17/HTR3B/CACNG2/GLRA1/CHRNA2/GRIN2B/SCN10A/KCNV1/CNGB1/KCNS2/GABRA6/SHANK2/CHRNB3/CACNA1B/RYR2/CHRNA4/HCN1/NOS1/KCNC2/TRPC5/CACNG3/KCNJ3/GABRG1/LRRC52/ATP1B4/GABRA3/CACNA1I/VWC2L/GRIN1/LRRC26/GABRA4/GABRB3/OLFM3/CACNA1E/KCNG3/DPP10/GABRA5/LRRC38/GABRG2/SHISA7/GABRB2/GABRA1/GABRP/KCNH1/KCNA4/LRRC7/KCNA5/CNTNAP2/KCNK4/HCN4/GRID2/SHANK1/GRIN2A/KCNV2/CACNA1S/KCNB1/FXYD4/CHRNA3/ABCG8/G…
GO_MESODERM_MORPHOGENESIS	GO_MESODERM_MORPHOGENESIS	74	-0.506476	-1.33994	0.0434783	1	1	2536	tags=23%, list=4%, signal=22%	FOXC1/WNT3A/ITGA2/FGFR1/TWSG1/FOXC2/EOMES/SNAI1/INHBA/ITGA3/EPHA2/EYA2/DKK1/HMGA2/APELA/TRIM15/MIR1-1
GO_NEGATIVE_REGULATION_OF_SMOOTH_MUSCLE_CELL_PROLIFERATION	GO_NEGATIVE_REGULATION_OF_SMOOTH_MUSCLE_CELL_PROLIFERATION	66	-0.609936	-1.53076	0.0454545	1	1	440	tags=8%, list=1%, signal=8%	MIR4632/MIR133A2/MIR15A/MIR1-1/MIR638
GO_ANTIGEN_PROCESSING_AND_PRESENTATION_OF_EXOGENOUS_PEPTIDE_ANTIGEN_VIA_MHC_CLASS_I	GO_ANTIGEN_PROCESSING_AND_PRESENTATION_OF_EXOGENOUS_PEPTIDE_ANTIGEN_VIA_MHC_CLASS_I	76	-0.576447	-1.5201	0.047619	1	1	16562	tags=74%, list=28%, signal=53%	PSMF1/SEC22B/PSMB3/PSMC4/PSMC3/VAMP3/PSMB5/PSMA4/PSMD14/IKBKB/TAPBP/PSMB4/PSMD5/FCGR1A/PSMC2/FCGR1B/CYBB/PSMD8/PSMC1/PSMD13/NCF2/HLA-E/PSMA7/TAP2/PSMA1/PSMC6/NCF1/PSMA5/FCER1G/CALR/ITGAV/PSMA3/ITGB5/PSMA2/PSMA6/PSMB11/PSMB10/B2M/CYBA/SNAP23/PDIA3/PSME1/CD36/PSME2/HLA-F/VAMP8/NCF4/PSMD9/PSMB8/TAP1/CLEC4A/PSMB9/IFI30/HLA-H/HLA-G/PSMA8
GO_NEGATIVE_REGULATION_OF_CELL_CYCLE_G1_S_PHASE_TRANSITION	GO_NEGATIVE_REGULATION_OF_CELL_CYCLE_G1_S_PHASE_TRANSITION	128	-0.585209	-1.73539	0.047619	1	1	440	tags=4%, list=1%, signal=4%	C10orf99/MIR133A2/MIR15A/MIR15B/MIR638
GO_POSITIVE_REGULATION_OF_ENDOTHELIAL_CELL_MIGRATION	GO_POSITIVE_REGULATION_OF_ENDOTHELIAL_CELL_MIGRATION	123	0.621262	1.34153	0.0481928	1	1	299	tags=2%, list=1%, signal=2%	MIR487B/MIRLET7F2/MIR31
