# Supplementary material for: Comprehensive analysis of the prognostic implications and functional exploration of PAK gene family in human cancer
Source: Cancer Cell Int. 2022 Sep 5;22:275. doi: 10.1186/s12935-022-02689-6 (PMC9442929; doi:10.1186/s12935-022-02689-6)
Supplement: Supplementary file 31 — Additional file 30: Table S7. Divided the expression of PAK1, PAK4, PAK6, and PAK7 gene into high- and low- gene expression groups for GSEA analysis in GBM. [file 12935_2022_2689_MOESM31_ESM.xlsx]

## Sheet: SheetName
cancertype	symbol	HR	cox_p	log_rank_p	higher_risk_of_death	entrez
ACC	PAK1	1.23388	0.593519	0.592843	Hypermethylation	5058
ACC	PAK2	1.64565	0.215248	0.210792	Hypermethylation	5062
ACC	PAK3	1.04917	0.902704	0.902694	Hypermethylation	5063
ACC	PAK4	1.21207	0.626373	0.625854	Hypermethylation	10298
ACC	PAK6	0.569188	0.160498	0.155337	Hypomethylation	56924
BLCA	PAK1	0.961676	0.878319	0.877868	Hypomethylation	5058
BLCA	PAK2	0.867898	0.588687	0.586278	Hypomethylation	5062
BLCA	PAK3	1.11101	0.676634	0.68068	Hypermethylation	5063
BLCA	PAK4	1.10679	0.694198	0.692193	Hypermethylation	10298
BLCA	PAK6	1.36292	0.229707	0.226958	Hypermethylation	56924
BRCA	PAK1	0.99511	0.983276	0.980284	Hypomethylation	5058
BRCA	PAK2	0.664222	0.088442	0.0855491	Hypomethylation	5062
BRCA	PAK3	0.707115	0.133329	0.130464	Hypomethylation	5063
BRCA	PAK4	0.680055	0.0991078	0.0963769	Hypomethylation	10298
BRCA	PAK6	0.73734	0.202259	0.199137	Hypomethylation	56924
COAD	PAK1	1.01141	0.967039	0.966049	Hypermethylation	5058
COAD	PAK2	1.04842	0.861975	0.863004	Hypermethylation	5062
COAD	PAK3	1.07918	0.780173	0.780672	Hypermethylation	5063
COAD	PAK4	0.750681	0.290306	0.28924	Hypomethylation	10298
COAD	PAK6	1.13371	0.648573	0.647739	Hypermethylation	56924
DLBC	PAK1	6.65327e-10	0.999167	0.0571059	Hypomethylation	5058
DLBC	PAK2	0.251009	0.26986	0.23754	Hypomethylation	5062
DLBC	PAK3	0.753551	0.7833	0.782697	Hypomethylation	5063
DLBC	PAK4	0.254166	0.263799	0.22767	Hypomethylation	10298
DLBC	PAK6	1.08317	0.944999	0.944985	Hypermethylation	56924
ESCA	PAK1	0.793114	0.430369	0.42839	Hypomethylation	5058
ESCA	PAK2	0.861231	0.610275	0.608281	Hypomethylation	5062
ESCA	PAK3	0.952274	0.864647	0.865507	Hypomethylation	5063
ESCA	PAK4	1.04854	0.866262	0.866828	Hypermethylation	10298
ESCA	PAK6	1.09137	0.774793	0.773584	Hypermethylation	56924
GBM	PAK1	0.981607	0.928952	0.931739	Hypomethylation	5058
GBM	PAK2	0.801618	0.29455	0.307266	Hypomethylation	5062
GBM	PAK3	0.914627	0.671608	0.676157	Hypomethylation	5063
GBM	PAK4	0.847863	0.430649	0.417711	Hypomethylation	10298
GBM	PAK6	0.784551	0.243949	0.234741	Hypomethylation	56924
HNSC	PAK1	1.0158	0.921916	0.922561	Hypermethylation	5058
HNSC	PAK2	0.851607	0.321373	0.320437	Hypomethylation	5062
HNSC	PAK3	1.09834	0.557783	0.558138	Hypermethylation	5063
HNSC	PAK4	1.08276	0.622926	0.622702	Hypermethylation	10298
HNSC	PAK6	1.03512	0.830599	0.831047	Hypermethylation	56924
KICH	PAK1	1.71306	0.4612	0.455797	Hypermethylation	5058
KICH	PAK2	0.660872	0.570683	0.567929	Hypomethylation	5062
KICH	PAK3	1.12119	0.871513	0.871443	Hypermethylation	5063
KICH	PAK4	0.391295	0.250674	0.233572	Hypomethylation	10298
KICH	PAK6	1.12874	0.864035	0.863952	Hypermethylation	56924
KIRC	PAK1	0.965904	0.866603	0.866831	Hypomethylation	5058
KIRC	PAK2	1.73283	0.0165625	0.0152568	Hypermethylation	5062
KIRC	PAK3	0.946722	0.789564	0.789798	Hypomethylation	5063
KIRC	PAK4	1.07645	0.735451	0.735277	Hypermethylation	10298
KIRC	PAK6	1.01881	0.931348	0.931254	Hypermethylation	56924
KIRP	PAK1	0.502366	0.100126	0.0936615	Hypomethylation	5058
KIRP	PAK2	0.673663	0.344621	0.341512	Hypomethylation	5062
KIRP	PAK3	1.43076	0.39525	0.392851	Hypermethylation	5063
KIRP	PAK4	1.26712	0.591821	0.590989	Hypermethylation	10298
KIRP	PAK6	1.89393	0.21011	0.202677	Hypermethylation	56924
LAML	PAK1	0.67903	0.052026	0.0487745	Hypomethylation	5058
LAML	PAK2	0.733878	0.117038	0.118021	Hypomethylation	5062
LAML	PAK3	0.922885	0.682901	0.679124	Hypomethylation	5063
LAML	PAK4	1.46959	0.05193	0.0518738	Hypermethylation	10298
LAML	PAK6	1.0476	0.813227	0.824793	Hypermethylation	56924
LGG	PAK1	0.611163	0.0346199	0.0285819	Hypomethylation	5058
LGG	PAK2	1.18918	0.441596	0.429803	Hypermethylation	5062
LGG	PAK3	0.946254	0.806043	0.832352	Hypomethylation	5063
LGG	PAK4	0.485191	0.00184117	0.00166198	Hypomethylation	10298
LGG	PAK6	0.756393	0.211419	0.224503	Hypomethylation	56924
LIHC	PAK1	0.567803	0.0188102	0.0173859	Hypomethylation	5058
LIHC	PAK2	1.12759	0.612837	0.614365	Hypermethylation	5062
LIHC	PAK3	0.850463	0.499768	0.499595	Hypomethylation	5063
LIHC	PAK4	1.54052	0.0855729	0.0834716	Hypermethylation	10298
LIHC	PAK6	0.874124	0.574484	0.572764	Hypomethylation	56924
LUAD	PAK1	0.728612	0.107047	0.105605	Hypomethylation	5058
LUAD	PAK2	1.3249	0.155116	0.154036	Hypermethylation	5062
LUAD	PAK3	0.949047	0.789319	0.790758	Hypomethylation	5063
LUAD	PAK4	1.09528	0.639006	0.639251	Hypermethylation	10298
LUAD	PAK6	1.0141	0.942856	0.944212	Hypermethylation	56924
LUSC	PAK1	0.980153	0.926282	0.926209	Hypomethylation	5058
LUSC	PAK2	0.778459	0.248084	0.246785	Hypomethylation	5062
LUSC	PAK3	1.13343	0.558224	0.557256	Hypermethylation	5063
LUSC	PAK4	0.88902	0.585372	0.584794	Hypomethylation	10298
LUSC	PAK6	1.18255	0.43201	0.43162	Hypermethylation	56924
PAAD	PAK1	1.24399	0.509583	0.508759	Hypermethylation	5058
PAAD	PAK2	0.674902	0.247076	0.244248	Hypomethylation	5062
PAAD	PAK3	0.476089	0.0327723	0.0293456	Hypomethylation	5063
PAAD	PAK4	0.874061	0.684685	0.68447	Hypomethylation	10298
PAAD	PAK6	0.567393	0.0961352	0.09255	Hypomethylation	56924
PRAD	PAK1	1.0363	0.968918	0.968916	Hypermethylation	5058
PRAD	PAK2	0.794857	0.801445	0.801018	Hypomethylation	5062
PRAD	PAK3	4.60186	0.172181	0.133192	Hypermethylation	5063
PRAD	PAK4	0.555769	0.51998	0.513977	Hypomethylation	10298
PRAD	PAK6	2.95615	0.333971	0.310996	Hypermethylation	56924
READ	PAK1	1.09503	0.875043	0.882109	Hypermethylation	5058
READ	PAK2	0.818865	0.743523	0.734707	Hypomethylation	5062
READ	PAK3	1.00054	0.999221	0.996759	Hypermethylation	5063
READ	PAK4	1.99802	0.250432	0.250608	Hypermethylation	10298
READ	PAK6	1.38976	0.564383	0.545961	Hypermethylation	56924
SARC	PAK1	0.677031	0.212805	0.209834	Hypomethylation	5058
SARC	PAK2	1.40735	0.257422	0.25565	Hypermethylation	5062
SARC	PAK3	1.32462	0.354972	0.353773	Hypermethylation	5063
SARC	PAK4	0.911821	0.762022	0.763988	Hypomethylation	10298
SARC	PAK6	1.44169	0.229659	0.227516	Hypermethylation	56924
SKCM	PAK1	0.909481	0.558315	0.55831	Hypomethylation	5058
SKCM	PAK2	0.830454	0.254493	0.253888	Hypomethylation	5062
SKCM	PAK3	0.961319	0.80789	0.808108	Hypomethylation	5063
SKCM	PAK4	0.778758	0.122021	0.120961	Hypomethylation	10298
SKCM	PAK6	0.966846	0.834	0.834202	Hypomethylation	56924
STAD	PAK1	1.0223	0.92418	0.923059	Hypermethylation	5058
STAD	PAK2	1.32017	0.223979	0.222427	Hypermethylation	5062
STAD	PAK3	0.816963	0.373143	0.371689	Hypomethylation	5063
STAD	PAK4	0.674209	0.0841512	0.0822809	Hypomethylation	10298
STAD	PAK6	0.867268	0.529612	0.52948	Hypomethylation	56924
TGCT	PAK1	2.20136e-09	0.999358	0.38994	Hypomethylation	5058
TGCT	PAK2	8.37803e+08	0.999341	0.244765	Hypermethylation	5062
TGCT	PAK3	4.54265e+08	0.999358	0.38994	Hypermethylation	5063
TGCT	PAK4	2.02545e-09	0.99935	0.365712	Hypomethylation	10298
TGCT	PAK6	2.20136e-09	0.999358	0.38994	Hypomethylation	56924
THCA	PAK1	2.44008	0.132224	0.119882	Hypermethylation	5058
THCA	PAK2	0.799313	0.675424	0.674787	Hypomethylation	5062
THCA	PAK3	0.667489	0.454832	0.451788	Hypomethylation	5063
THCA	PAK4	1.73842	0.321728	0.315596	Hypermethylation	10298
THCA	PAK6	1.29867	0.62949	0.628532	Hypermethylation	56924
UCEC	PAK1	1.82317	0.0485733	0.0453282	Hypermethylation	5058
UCEC	PAK2	0.428371	0.00928825	0.00740771	Hypomethylation	5062
UCEC	PAK3	0.61988	0.110398	0.10719	Hypomethylation	5063
UCEC	PAK4	0.979971	0.946343	0.946357	Hypomethylation	10298
UCEC	PAK6	1.29724	0.384481	0.383433	Hypermethylation	56924
UCS	PAK1	0.995314	0.988988	0.991985	Hypomethylation	5058
UCS	PAK2	1.34709	0.407471	0.405594	Hypermethylation	5062
UCS	PAK3	1.05764	0.873445	0.870287	Hypermethylation	5063
UCS	PAK4	0.890229	0.739964	0.739498	Hypomethylation	10298
UCS	PAK6	0.792302	0.496919	0.493684	Hypomethylation	56924
