# Supplementary material for: Comprehensive analysis of the prognostic implications and functional exploration of PAK gene family in human cancer
Source: Cancer Cell Int. 2022 Sep 5;22:275. doi: 10.1186/s12935-022-02689-6 (PMC9442929; doi:10.1186/s12935-022-02689-6)
Supplement: Supplementary file 32 — Additional file 32: Table S8. Correlation between PAK mRNAs and protein levels of Akt, Akt pS473, and Akt pT308 in all tumor cell lines based on CCLE database. [file 12935_2022_2689_MOESM32_ESM.xlsx]

## Sheet: Sheet1
Gene	PAK1	PAK2	PAK3	PAK4	PAK6	PAK7		Sample_ID	Sample_ID	Akt	Akt_pS473	Akt_pT308		Sample_ID	PAK1	PAK2	PAK3	PAK4	PAK6	PAK7
TCGA-06-0878-01A	4.90361	6.46588	0.564483	4.23312	0.33891	0.170217		TCGA-19-1390-01A-21-1898-20	TCGA-19-1390-01A	-0.100387	1.43537	1.00061		TCGA-19-1390-01A	3.40565	6.23678	3.18335	5.02081	5.02081	0.152588
TCGA-26-5135-01A	4.95188	5.52392	2.26091	4.80186	0.077404	1.35908		TCGA-76-4932-01A-22-1899-20	TCGA-76-4932-01A	1.00824	2.58653	1.51368		TCGA-76-4932-01A	3.50016	6.24546	0.954772	4.50641	4.50641	0
TCGA-06-5859-01A	5.59184	5.56978	3.2267	4.31659	0.125928	0.662741		TCGA-06-5414-01A-21-1899-20	TCGA-06-5414-01A	-0.225584	1.9463	1.88997		TCGA-06-5414-01A	3.64458	6.46955	0.750502	4.90711	4.90711	0.099794
TCGA-06-2563-01A	4.46975	5.63623	1.39484	4.7729	0.138188	0.981182		TCGA-19-2620-01A-03-1900-20	TCGA-19-2620-01A	0.466763	1.56792	1.11509		TCGA-19-2620-01A	3.72972	5.95594	1.24422	4.64482	4.64482	0.174871
TCGA-41-2571-01A	4.59972	5.58656	2.9561	4.49673	0.0956208	3.80513		TCGA-27-1831-01A-21-1899-20	TCGA-27-1831-01A	0.54538	1.31001	0.582569		TCGA-27-1831-01A	3.75009	5.82058	0.338956	2.481	2.481	0.0452558
TCGA-28-5207-01A	5.43777	6.29933	2.97872	4.82335	0.350737	1.915		TCGA-12-3652-01A-22-1899-20	TCGA-12-3652-01A	0.867102	1.19999	1.35803		TCGA-12-3652-01A	3.79211	5.61011	0.393355	4.80276	4.80276	0.0338616
TCGA-14-0871-01A	4.74523	5.80654	2.41795	4.54874	0.0441799	0.495067		TCGA-06-5417-01A-21-1899-20	TCGA-06-5417-01A	0.0531488	0.171533	-0.444495		TCGA-06-5417-01A	3.99662	5.85186	2.55878	3.75753	3.75753	0.0332535
TCGA-16-1045-01B	5.04756	6.24331	0.6359	3.90149	0.194547	0.236685		TCGA-12-5295-01A-21-1899-20	TCGA-12-5295-01A	0.518797	1.78072	0.768376		TCGA-12-5295-01A	4.04764	5.9602	0.389853	4.1612	4.1612	0.0271565
TCGA-32-2632-01A	4.57776	5.88985	0.776167	4.54614	0.220114	0.30587		TCGA-26-1442-01A-21-1898-20	TCGA-26-1442-01A	-0.219362	1.42507	0.63828		TCGA-26-1442-01A	4.1567	5.55772	2.31974	3.68811	3.68811	0.0941503
TCGA-28-2514-01A	5.61055	6.55435	3.7651	4.94613	0.473569	1.46667		TCGA-19-2619-01A-03-1900-20	TCGA-19-2619-01A	1.17107	0.676541	0.904404		TCGA-19-2619-01A	4.16532	6.55297	1.8089	4.52077	4.52077	0.104063		Cor	PAK1	PAK2	PAK3	PAK4	PAK6	PAK7
TCGA-06-0141-01A	4.41231	5.37637	2.12803	3.1596	0.0751635	0.618757		TCGA-06-5418-01A-21-1899-20	TCGA-06-5418-01A	0.397944	2.82548	2.56479		TCGA-06-5418-01A	4.1982	6.21465	0.541355	4.10623	4.10623	0.125704		Akt	-0.154219	0.0243795	-0.00796171	0.169572	0.169572	-0.123002
TCGA-06-2569-01A	5.68081	6.01131	2.19734	3.00535	0.0430306	0.290446		TCGA-06-2570-01A-22-1899-20	TCGA-06-2570-01A	0.640549	1.81449	1.26069		TCGA-06-2570-01A	4.23611	5.93697	2.70555	4.22489	4.22489	0.128141		Akt_pS473	0.166617	0.136272	0.202179	0.0837284	0.0837284	0.225512
TCGA-02-2485-01A	5.17447	6.10649	3.04751	5.22079	0.133835	1.73898		TCGA-06-2565-01A-22-1899-20	TCGA-06-2565-01A	0.749807	1.74249	1.36939		TCGA-06-2565-01A	4.23686	5.74813	1.00543	4.82531	4.82531	0.0817207		Akt_pT308	0.119008	0.138414	0.0494557	0.0416771	0.0416771	0.195598
TCGA-06-0138-01A	4.49514	5.20664	1.41207	3.72339	0.025108	1.0217		TCGA-26-5134-01A-21-1899-20	TCGA-26-5134-01A	-0.484191	1.5651	0.190007		TCGA-26-5134-01A	4.36621	5.84712	2.77954	4.4141	4.4141	0.0476638
TCGA-06-2564-01A	4.88315	6.75425	2.72518	4.01852	0.117567	0.630797		TCGA-14-1823-01A-21-1899-20	TCGA-14-1823-01A	0.365059	0.471704	-0.0725071		TCGA-14-1823-01A	4.4315	5.35357	0.371142	3.48182	3.48182	0.182686
TCGA-16-0846-01A	4.94341	5.47593	2.93562	4.56698	0.146447	2.90983		TCGA-06-0125-01A-03-1900-20	TCGA-06-0125-01A	0.844764	2.30889	1.93823		TCGA-06-0125-01A	4.43729	6.46676	1.28988	4.95289	4.95289	0.0601942
TCGA-76-4928-01B	4.68072	5.93227	0.723174	4.56542	0.272386	0.212693		TCGA-76-4927-01A-22-1899-20	TCGA-76-4927-01A	-0.313617	2.04886	1.42399		TCGA-76-4927-01A	4.44466	6.2226	0.760969	4.85545	4.85545	0.061784
TCGA-76-4931-01A	4.81591	6.28229	3.10777	4.66752	0.213096	1.30879		TCGA-26-5132-01A-22-1899-20	TCGA-26-5132-01A	0.356995	1.79535	0.424353		TCGA-26-5132-01A	4.46074	5.69741	1.70128	4.73276	4.73276	0.181891
TCGA-14-0817-01A	4.66851	5.18538	1.96866	3.75939	0.0909405	0.670091		TCGA-27-1830-01A-21-1899-20	TCGA-27-1830-01A	-0.140557	3.24554	2.28765		TCGA-27-1830-01A	4.46729	5.52463	2.75024	4.12001	4.12001	0.0402482
TCGA-19-2620-01A	3.72972	5.95594	1.24422	4.64482	0.174871	0.601023		TCGA-06-2563-01A-22-1899-20	TCGA-06-2563-01A	1.24355	1.30533	1.16827		TCGA-06-2563-01A	4.46975	5.63623	1.39484	4.7729	4.7729	0.138188
TCGA-26-5132-01A	4.46074	5.69741	1.70128	4.73276	0.181891	0.261429		TCGA-41-3915-01A-22-1899-20	TCGA-41-3915-01A	-0.0594305	2.26337	1.60857		TCGA-41-3915-01A	4.49797	6.45389	1.49895	4.69621	4.69621	0.161072
TCGA-06-0125-02A	5.07738	6.67974	1.80037	4.81563	0.156382	1.29509		TCGA-26-5133-01A-21-1899-20	TCGA-26-5133-01A	-0.350049	0.591173	-0.373416		TCGA-26-5133-01A	4.52584	6.19645	1.59482	5.36495	5.36495	0.0577311
TCGA-06-2558-01A	5.02254	6.21957	3.56758	4.22909	0.127301	3.75692		TCGA-28-5208-01A-21-1899-20	TCGA-28-5208-01A	0.470345	1.74983	1.00837		TCGA-28-5208-01A	4.57442	6.2824	0.804614	5.0759	5.0759	0.0238637
TCGA-06-5414-01A	3.64458	6.46955	0.750502	4.90711	0.099794	0		TCGA-06-5856-01A-21-1899-20	TCGA-06-5856-01A	0.172432	1.11097	0.864762		TCGA-06-5856-01A	4.64511	6.09627	1.75536	4.40663	4.40663	0.106842
TCGA-26-5133-01A	4.52584	6.19645	1.59482	5.36495	0.0577311	2.86535		TCGA-32-5222-01A-21-1899-20	TCGA-32-5222-01A	0.321364	2.20575	1.77969		TCGA-32-5222-01A	4.66595	5.89149	0.790185	4.10346	4.10346	0.0479575
TCGA-32-4213-01A	4.59854	5.74653	1.40147	3.93322	0.0767017	0.588964		TCGA-76-4928-01B-22-1899-20	TCGA-76-4928-01B	-1.49964	0.672587	0.42207		TCGA-76-4928-01B	4.68072	5.93227	0.723174	4.56542	4.56542	0.272386
TCGA-06-0210-01A	4.25886	6.23178	0.598768	3.78146	0.166192	0.150649		TCGA-12-3653-01A-22-1899-20	TCGA-12-3653-01A	1.61632	0.335564	1.15001		TCGA-12-3653-01A	4.70108	6.19247	0.477818	5.08556	5.08556	0.0520038
TCGA-41-2572-01A	3.97233	5.55956	0.300891	4.68544	0.0505224	0.267186		TCGA-14-0871-01A-21-1898-20	TCGA-14-0871-01A	0.816847	0	0.48941		TCGA-14-0871-01A	4.74523	5.80654	2.41795	4.54874	4.54874	0.0441799
TCGA-06-5417-01A	3.99662	5.85186	2.55878	3.75753	0.0332535	1.95622		TCGA-06-5408-01A-21-1899-20	TCGA-06-5408-01A	0.562601	1.81337	1.01228		TCGA-06-5408-01A	4.76912	6.4423	1.93471	5.10407	5.10407	0.210372
TCGA-19-2624-01A	4.85169	5.99826	4.21806	4.69339	0.115711	2.7849		TCGA-12-1597-01B-21-1898-20	TCGA-12-1597-01B	0.817684	2.55955	2.11321		TCGA-12-1597-01B	4.77008	5.59307	3.61023	4.51549	4.51549	0.200931
TCGA-14-1823-01A	4.4315	5.35357	0.371142	3.48182	0.182686	0.171082		TCGA-76-4931-01A-22-1899-20	TCGA-76-4931-01A	0.810629	3.4826	2.85796		TCGA-76-4931-01A	4.81591	6.28229	3.10777	4.66752	4.66752	0.213096
TCGA-02-0055-01A	4.76836	5.43138	1.85627	3.56366	0.104409	0.595838		TCGA-32-1970-01A-21-1899-20	TCGA-32-1970-01A	0.497601	0.72465	0.480168		TCGA-32-1970-01A	4.81632	6.14483	2.52172	4.5278	4.5278	0.180298
TCGA-32-1982-01A	4.85635	5.49125	1.38038	4.22751	0.0845613	0.846933		TCGA-06-5858-01A-21-1899-20	TCGA-06-5858-01A	-0.00735627	3.41009	2.90403		TCGA-06-5858-01A	4.82759	6.68659	3.28944	4.22025	4.22025	0.129598
TCGA-06-0681-11A	7.76871	4.75858	5.32399	3.65181	1.16065	4.53871		TCGA-06-0238-01A-03-1900-20	TCGA-06-0238-01A	0.570882	0.882278	0.677475		TCGA-06-0238-01A	4.83638	5.43062	2.82074	3.8835	3.8835	0.158579
TCGA-06-2570-01A	4.23611	5.93697	2.70555	4.22489	0.128141	3.87093		TCGA-32-1982-01A-21-1899-20	TCGA-32-1982-01A	0.10773	0.851889	0.861554		TCGA-32-1982-01A	4.85635	5.49125	1.38038	4.22751	4.22751	0.0845613
TCGA-06-0745-01A	4.85357	5.78602	2.06658	4.81488	0.064401	0.0918415		TCGA-06-2564-01A-22-1899-20	TCGA-06-2564-01A	0.203777	1.4093	1.34048		TCGA-06-2564-01A	4.88315	6.75425	2.72518	4.01852	4.01852	0.117567
TCGA-14-1402-02A	3.9833	5.48437	1.19032	3.1313	0.0677239	0.709141		TCGA-06-0878-01A-21-1898-20	TCGA-06-0878-01A	0.284068	0.932634	0.842408		TCGA-06-0878-01A	4.90361	6.46588	0.564483	4.23312	4.23312	0.33891
TCGA-14-0781-01B	4.12037	5.62621	2.1037	4.00258	0.207267	0.211761		TCGA-06-5412-01A-21-1899-20	TCGA-06-5412-01A	-0.0179865	1.75045	1.31257		TCGA-06-5412-01A	4.93309	5.66644	0.771681	4.2268	4.2268	0.195164
TCGA-32-5222-01A	4.66595	5.89149	0.790185	4.10346	0.0479575	0.312177		TCGA-16-0846-01A-21-1898-20	TCGA-16-0846-01A	0	3.14527	2.24338		TCGA-16-0846-01A	4.94341	5.47593	2.93562	4.56698	4.56698	0.146447
TCGA-28-5204-01A	5.00997	6.47583	1.12732	4.64652	0.193192	0.377816		TCGA-06-5416-01A-21-1899-20	TCGA-06-5416-01A	-0.260497	0.911673	-0.130747		TCGA-06-5416-01A	4.99418	6.41023	3.89045	4.56911	4.56911	0.182819
TCGA-06-5410-01A	5.32564	6.04726	1.14584	3.95799	0.0854857	0.61401		TCGA-28-1747-01C-21-1899-20	TCGA-28-1747-01C	0.207369	2.78696	2.16642		TCGA-28-1747-01C	4.99691	6.03705	2.28513	4.45502	4.45502	0.110694
TCGA-14-1829-01A	3.90954	5.53874	0.696721	2.87926	0.0309825	0.174348		TCGA-06-2559-01A-22-1899-20	TCGA-06-2559-01A	0.399194	2.63429	1.91164		TCGA-06-2559-01A	5.02134	6.69831	2.40968	4.40034	4.40034	0.197411
TCGA-02-0047-01A	5.04264	6.51565	3.43173	4.12777	0.251728	2.58638		TCGA-06-2558-01A-22-1899-20	TCGA-06-2558-01A	0.0836934	2.1375	1.58613		TCGA-06-2558-01A	5.02254	6.21957	3.56758	4.22909	4.22909	0.127301
TCGA-15-0742-01A	3.12307	5.71036	1.03929	4.49816	0.0385246	0.227634		TCGA-06-2562-01A-22-1899-20	TCGA-06-2562-01A	0.258869	2.36537	1.80281		TCGA-06-2562-01A	5.03409	6.07332	2.46753	4.2106	4.2106	0.211571
TCGA-19-2619-01A	4.16532	6.55297	1.8089	4.52077	0.104063	0.672419		TCGA-41-4097-01A-22-1899-20	TCGA-41-4097-01A	0.37182	1.63543	0.83921		TCGA-41-4097-01A	5.06551	6.08041	2.88607	4.51426	4.51426	0.248952
TCGA-06-0168-01A	5.17885	5.4372	2.80253	4.43142	0.314514	1.08596		TCGA-19-5960-01A-13-1900-20	TCGA-19-5960-01A	0.601678	1.52171	0.342088		TCGA-19-5960-01A	5.1303	6.31574	4.06827	4.67066	4.67066	0.228061
TCGA-19-1390-01A	3.40565	6.23678	3.18335	5.02081	0.152588	1.01431		TCGA-06-2557-01A-22-1899-20	TCGA-06-2557-01A	-0.0855096	1.4316	0.917342		TCGA-06-2557-01A	5.14192	6.224	1.79157	4.44409	4.44409	0.100094
TCGA-41-4097-01A	5.06551	6.08041	2.88607	4.51426	0.248952	0.932433		TCGA-27-1832-01A-21-1899-20	TCGA-27-1832-01A	-0.685862	2.10594	1.43676		TCGA-27-1832-01A	5.15964	5.70217	1.11862	4.52548	4.52548	0.206177
TCGA-06-0649-01B	4.67334	5.64018	1.59568	4.12611	0.180777	2.04043		TCGA-02-2485-01A-22-1899-20	TCGA-02-2485-01A	1.65642	3.18036	0.886602		TCGA-02-2485-01A	5.17447	6.10649	3.04751	5.22079	5.22079	0.133835
TCGA-27-2526-01A	2.91452	5.60761	0.126753	3.81086	0.0371431	0.0582054		TCGA-06-5413-01A-21-1899-20	TCGA-06-5413-01A	0.0459028	0.966294	0.805034		TCGA-06-5413-01A	5.18892	6.18476	2.82198	4.4195	4.4195	0.0744992
TCGA-27-2523-01A	4.55728	5.6688	1.89871	5.2282	0.0957589	0.152723		TCGA-06-0129-01A-03-1900-20	TCGA-06-0129-01A	0.492553	1.59383	0.548478		TCGA-06-0129-01A	5.1932	6.54034	3.14281	4.67702	4.67702	0.0870085
TCGA-06-5412-01A	4.93309	5.66644	0.771681	4.2268	0.195164	0.339799		TCGA-06-0156-01A-41-1898-20	TCGA-06-0156-01A	-0.0338653	2.43551	1.9613		TCGA-06-0156-01A	5.21848	6.4074	3.37056	4.31413	4.31413	0.235146
TCGA-19-4065-01A	4.75393	6.0453	1.52246	3.6977	0.0654104	0.520154		TCGA-06-1804-01A-21-1899-20	TCGA-06-1804-01A	0.282317	2.05709	1.33817		TCGA-06-1804-01A	5.21952	5.49783	3.41573	4.27777	4.27777	0.337032
TCGA-06-0644-01A	5.55461	6.10891	1.26038	5.03195	0.207749	0.0573487		TCGA-06-0882-01A-21-1898-20	TCGA-06-0882-01A	0.518718	2.04797	2.24846		TCGA-06-0882-01A	5.23711	5.84653	2.54422	4.09315	4.09315	0.160629
TCGA-12-0821-01A	4.99003	6.31491	2.09347	4.72709	0.0765634	1.53596		TCGA-76-4929-01A-22-1899-20	TCGA-76-4929-01A	0.0776272	1.25658	0.524079		TCGA-76-4929-01A	5.25676	6.13314	3.6797	3.90938	3.90938	0.288426
TCGA-28-1753-01A	4.674	6.18789	2.86611	4.51353	0.0488838	0.53987		TCGA-08-0386-01A-21-1898-20	TCGA-08-0386-01A	0.187806	2.65151	2.58458		TCGA-08-0386-01A	5.276	5.99241	3.61716	4.1707	4.1707	0.409173
TCGA-12-0619-01A	4.80339	6.11049	2.20451	4.47266	0.124405	1.65626		TCGA-06-5410-01A-21-1899-20	TCGA-06-5410-01A	-0.26943	0.648142	0.403925		TCGA-06-5410-01A	5.32564	6.04726	1.14584	3.95799	3.95799	0.0854857
TCGA-14-0789-01A	4.65644	6.31529	0.567855	4.73184	0.0590363	0.243018		TCGA-06-0130-01A-03-1900-20	TCGA-06-0130-01A	0.0833806	2.5062	1.8899		TCGA-06-0130-01A	5.34953	6.0986	0.425393	4.12522	4.12522	0.0748679
TCGA-32-2634-01A	5.60316	6.32981	3.20959	4.85411	0.250907	3.00869		TCGA-27-1834-01A-21-1899-20	TCGA-27-1834-01A	-0.227386	2.0644	1.26985		TCGA-27-1834-01A	5.36906	6.44107	2.30549	4.28965	4.28965	0.228082
TCGA-06-0158-01A	4.83514	6.13551	2.18262	4.97157	0.100528	0.332424		TCGA-76-4926-01B-22-1899-20	TCGA-76-4926-01B	-0.252837	2.38513	1.50306		TCGA-76-4926-01B	5.3744	6.29005	2.29698	4.25877	4.25877	0.226616
TCGA-06-0152-02A	5.32498	6.48626	2.98084	4.56825	0.230078	0.833515		TCGA-41-5651-01A-21-1899-20	TCGA-41-5651-01A	0.659287	1.91283	0.866816		TCGA-41-5651-01A	5.50138	6.13786	4.03455	4.7464	4.7464	0.257471
TCGA-12-0618-01A	5.17823	6.13034	3.82469	4.63604	0.16368	4.85859		TCGA-06-0644-01A-21-1898-20	TCGA-06-0644-01A	0.112632	1.97617	1.56232		TCGA-06-0644-01A	5.55461	6.10891	1.26038	5.03195	5.03195	0.207749
TCGA-26-5139-01A	4.623	6.28094	1.21754	4.86449	0.162967	0.603067		TCGA-06-5859-01A-21-1899-20	TCGA-06-5859-01A	-0.182757	0.204177	-0.104421		TCGA-06-5859-01A	5.59184	5.56978	3.2267	4.31659	4.31659	0.125928
TCGA-06-0747-01A	4.61584	5.71732	1.40894	4.82871	0.0863443	0.450703		TCGA-06-2567-01A-22-1899-20	TCGA-06-2567-01A	0.026453	2.43547	1.60578		TCGA-06-2567-01A	5.9409	5.69595	1.85578	4.59789	4.59789	0.485561
TCGA-32-2616-01A	3.34448	6.038	2.15249	4.53503	0.10315	0.384477		TCGA-06-5411-01A-21-1899-20	TCGA-06-5411-01A	0.358523	2.62089	1.94545		TCGA-06-5411-01A	6.33378	5.58188	4.36152	3.94383	3.94383	0.807452
TCGA-06-0129-01A	5.1932	6.54034	3.14281	4.67702	0.0870085	3.81068		TCGA-02-0011-01B-11-1898-20	TCGA-02-0011-01B	-0.0996668	1.54127	1.2388		TCGA-02-0011-01B	#N/A	#N/A	#N/A	#N/A	#N/A	#N/A
TCGA-06-0125-01A	4.43729	6.46676	1.28988	4.95289	0.0601942	0.485777		TCGA-08-0345-01A-21-1898-20	TCGA-08-0345-01A	0.292527	3.00582	2.35703		TCGA-08-0345-01A	#N/A	#N/A	#N/A	#N/A	#N/A	#N/A
TCGA-06-0157-01A	4.95762	5.90847	2.63369	4.78086	0.147093	1.97599		TCGA-08-0353-01A-21-1898-20	TCGA-08-0353-01A	0.226969	2.56368	2.03049		TCGA-08-0353-01A	#N/A	#N/A	#N/A	#N/A	#N/A	#N/A
TCGA-06-AABW-11A	5.7455	6.28931	3.95184	4.91476	0.435871	2.7367		TCGA-08-0373-01A-21-1898-20	TCGA-08-0373-01A	0.044643	1.94257	1.42399		TCGA-08-0373-01A	#N/A	#N/A	#N/A	#N/A	#N/A	#N/A
TCGA-28-5220-01A	4.57554	5.08816	2.46013	4.40691	0.196762	0.104659		TCGA-19-1386-01A-21-1898-20	TCGA-19-1386-01A	0.971676	1.41178	1.32442		TCGA-19-1386-01A	#N/A	#N/A	#N/A	#N/A	#N/A	#N/A
TCGA-12-5295-01A	4.04764	5.9602	0.389853	4.1612	0.0271565	0.0929842		TCGA-15-1447-01A-21-1898-20	TCGA-15-1447-01A	0.450119	1.20895	0.269331		TCGA-15-1447-01A	#N/A	#N/A	#N/A	#N/A	#N/A	#N/A
TCGA-06-0645-01A	4.88441	5.80005	1.70064	4.34022	0.0703563	0.983625		TCGA-06-0879-01A-21-1898-20	TCGA-06-0879-01A	0.398111	1.49912	1.26206		TCGA-06-0879-01A	#N/A	#N/A	#N/A	#N/A	#N/A	#N/A
TCGA-76-4929-01A	5.25676	6.13314	3.6797	3.90938	0.288426	4.74432		TCGA-12-0692-01A-21-1898-20	TCGA-12-0692-01A	0.0802566	1.82977	0.744221		TCGA-12-0692-01A	#N/A	#N/A	#N/A	#N/A	#N/A	#N/A
TCGA-32-2615-01A	4.29038	5.97999	1.16383	4.62329	0.202166	0.643496		TCGA-08-0346-01A-21-1898-20	TCGA-08-0346-01A	0.785325	1.47897	0.389898		TCGA-08-0346-01A	#N/A	#N/A	#N/A	#N/A	#N/A	#N/A
TCGA-32-1980-01A	6.637	5.44778	3.71161	4.06394	0.578823	3.07753		TCGA-08-0354-01A-21-1898-20	TCGA-08-0354-01A	-0.0360977	-0.337946	-0.118302		TCGA-08-0354-01A	#N/A	#N/A	#N/A	#N/A	#N/A	#N/A
TCGA-26-1442-01A	4.1567	5.55772	2.31974	3.68811	0.0941503	2.20967		TCGA-08-0375-01A-21-1898-20	TCGA-08-0375-01A	-0.203386	1.68773	1.21031		TCGA-08-0375-01A	#N/A	#N/A	#N/A	#N/A	#N/A	#N/A
TCGA-06-0187-01A	4.34035	6.24997	0.153715	4.61862	0.258879	0.141311		TCGA-19-1389-01A-21-1898-20	TCGA-19-1389-01A	-0.0225189	1.77738	0.893079		TCGA-19-1389-01A	#N/A	#N/A	#N/A	#N/A	#N/A	#N/A
TCGA-14-0790-01B	4.14256	6.06727	0.695962	4.9561	0.0351523	0.230126		TCGA-15-1449-01A-21-1898-20	TCGA-15-1449-01A	0.688003	1.16383	0.898621		TCGA-15-1449-01A	#N/A	#N/A	#N/A	#N/A	#N/A	#N/A
TCGA-14-2554-01A	4.73499	5.86935	1.20875	4.03817	0.0823605	0.486638		TCGA-14-0813-01A-21-1898-20	TCGA-14-0813-01A	0.46207	3.00214	2.35854		TCGA-14-0813-01A	#N/A	#N/A	#N/A	#N/A	#N/A	#N/A
TCGA-28-2510-01A	6.64277	5.64843	4.16689	3.86013	0.85135	3.13731		TCGA-19-1786-01A-21-1898-20	TCGA-19-1786-01A	0.886774	2.12909	1.83231		TCGA-19-1786-01A	#N/A	#N/A	#N/A	#N/A	#N/A	#N/A
TCGA-06-2565-01A	4.23686	5.74813	1.00543	4.82531	0.0817207	0.335211		TCGA-28-1757-01A-11-1898-20	TCGA-28-1757-01A	-0.368468	-0.41066	0.100112		TCGA-28-1757-01A	#N/A	#N/A	#N/A	#N/A	#N/A	#N/A
TCGA-06-0156-01A	5.21848	6.4074	3.37056	4.31413	0.235146	3.16147		TCGA-02-0068-01A-11-1898-20	TCGA-02-0068-01A	-0.141888	1.0176	0.39303		TCGA-02-0068-01A	#N/A	#N/A	#N/A	#N/A	#N/A	#N/A
TCGA-14-1825-01A	4.5446	7.03917	2.77274	4.58858	0.0542073	3.08142		TCGA-08-0347-01A-21-1898-20	TCGA-08-0347-01A	-0.155226	2.90096	2.30619		TCGA-08-0347-01A	#N/A	#N/A	#N/A	#N/A	#N/A	#N/A
TCGA-12-1597-01B	4.77008	5.59307	3.61023	4.51549	0.200931	3.81359		TCGA-08-0355-01A-21-1898-20	TCGA-08-0355-01A	0.42537	2.36279	2.12273		TCGA-08-0355-01A	#N/A	#N/A	#N/A	#N/A	#N/A	#N/A
TCGA-19-4065-02A	5.45247	5.63597	3.39729	4.08887	0.230619	2.10873		TCGA-08-0380-01A-21-1898-20	TCGA-08-0380-01A	0.0758354	2.06113	1.41502		TCGA-08-0380-01A	#N/A	#N/A	#N/A	#N/A	#N/A	#N/A
TCGA-41-3915-01A	4.49797	6.45389	1.49895	4.69621	0.161072	1.29661		TCGA-19-1788-01A-21-1898-20	TCGA-19-1788-01A	0.220576	1.94484	1.28154		TCGA-19-1788-01A	#N/A	#N/A	#N/A	#N/A	#N/A	#N/A
TCGA-06-2561-01A	5.15161	6.21303	2.37414	3.54076	0.363262	1.10351		TCGA-28-1760-01A-21-1898-20	TCGA-28-1760-01A	0.5255	2.85831	1.91999		TCGA-28-1760-01A	#N/A	#N/A	#N/A	#N/A	#N/A	#N/A
TCGA-06-0678-11A	8.18336	5.17362	5.75249	3.59496	1.53816	4.23546		TCGA-08-0348-01A-21-1898-20	TCGA-08-0348-01A	0.000430789	2.7252	1.89529		TCGA-08-0348-01A	#N/A	#N/A	#N/A	#N/A	#N/A	#N/A
TCGA-19-1787-01B	4.61636	5.85883	0.507783	4.91171	0.301655	0.1471		TCGA-08-0356-01A-21-1898-20	TCGA-08-0356-01A	0.899063	2.2273	2.00166		TCGA-08-0356-01A	#N/A	#N/A	#N/A	#N/A	#N/A	#N/A
TCGA-27-1830-01A	4.46729	5.52463	2.75024	4.12001	0.0402482	1.98643		TCGA-08-0385-01A-21-1898-20	TCGA-08-0385-01A	0.243513	2.28854	1.48882		TCGA-08-0385-01A	#N/A	#N/A	#N/A	#N/A	#N/A	#N/A
TCGA-28-1747-01C	4.99691	6.03705	2.28513	4.45502	0.110694	0.773472		TCGA-19-1392-01A-21-1898-20	TCGA-19-1392-01A	0.0260463	1.97747	1.53786		TCGA-19-1392-01A	#N/A	#N/A	#N/A	#N/A	#N/A	#N/A
TCGA-14-1034-02B	4.94409	7.02072	1.61115	4.03504	0.269894	0.969361		TCGA-06-0650-01A-21-1898-20	TCGA-06-0650-01A	-0.0414052	0.951393	0.627083		TCGA-06-0650-01A	#N/A	#N/A	#N/A	#N/A	#N/A	#N/A
TCGA-28-2499-01A	4.57805	6.04587	0.248508	4.3355	0.135573	0.0737325		TCGA-19-1789-01A-21-1898-20	TCGA-19-1789-01A	1.09173	1.48549	0.586828		TCGA-19-1789-01A	#N/A	#N/A	#N/A	#N/A	#N/A	#N/A
TCGA-06-2567-01A	5.9409	5.69595	1.85578	4.59789	0.485561	1.14102		TCGA-06-1800-01A-21-1898-20	TCGA-06-1800-01A	0.740326	2.31807	1.70933		TCGA-06-1800-01A	#N/A	#N/A	#N/A	#N/A	#N/A	#N/A
TCGA-06-0686-01A	4.74759	6.00302	2.53233	4.91894	0.130474	2.34558		TCGA-02-0116-01A-11-1898-20	TCGA-02-0116-01A	-1.47683	0.613449	0.180376		TCGA-02-0116-01A	#N/A	#N/A	#N/A	#N/A	#N/A	#N/A
TCGA-27-2528-01A	3.96665	5.45441	1.03403	4.28213	0.0454803	0.135348		TCGA-08-0349-01A-21-1898-20	TCGA-08-0349-01A	-0.509226	2.75355	1.99517		TCGA-08-0349-01A	#N/A	#N/A	#N/A	#N/A	#N/A	#N/A
TCGA-06-0184-01A	4.32963	5.52408	0.261765	4.32756	0.106688	0.112274		TCGA-08-0357-01A-21-1898-20	TCGA-08-0357-01A	0.592175	2.53064	1.82694		TCGA-08-0357-01A	#N/A	#N/A	#N/A	#N/A	#N/A	#N/A
TCGA-06-0744-01A	4.04236	5.41577	1.01995	4.75568	0.0264265	0.226613		TCGA-06-0155-01B-21-1898-20	TCGA-06-0155-01B	0.551099	2.33317	2.31683		TCGA-06-0155-01B	#N/A	#N/A	#N/A	#N/A	#N/A	#N/A
TCGA-06-0171-02A	5.23079	6.51266	0.7375	3.93195	0.160853	0.408166		TCGA-19-0962-01B-21-1898-20	TCGA-19-0962-01B	0.736547	2.22092	1.36465		TCGA-19-0962-01B	#N/A	#N/A	#N/A	#N/A	#N/A	#N/A
TCGA-14-0787-01A	4.56699	5.9151	1.17863	4.25771	0.0478776	0.574088		TCGA-06-0875-01A-21-1898-20	TCGA-06-0875-01A	0.243916	3.23752	2.25526		TCGA-06-0875-01A	#N/A	#N/A	#N/A	#N/A	#N/A	#N/A
TCGA-06-0178-01A	3.36363	5.04977	2.2336	3.50356	0.0446635	3.05163		TCGA-08-0389-01A-21-1898-20	TCGA-08-0389-01A	0.609554	2.05905	1.63217		TCGA-08-0389-01A	#N/A	#N/A	#N/A	#N/A	#N/A	#N/A
TCGA-06-2557-01A	5.14192	6.224	1.79157	4.44409	0.100094	0.916885		TCGA-12-1598-01A-21-1898-20	TCGA-12-1598-01A	0.501316	1.62806	0.472674		TCGA-12-1598-01A	#N/A	#N/A	#N/A	#N/A	#N/A	#N/A
TCGA-06-0211-02A	4.4542	6.18723	2.65782	4.47916	0.0801449	1.37021		TCGA-19-1791-01A-21-1898-20	TCGA-19-1791-01A	0.325464	2.73336	1.50975		TCGA-19-1791-01A	#N/A	#N/A	#N/A	#N/A	#N/A	#N/A
TCGA-06-0675-11A	7.98323	4.86617	5.88094	3.37595	1.66257	4.66248		TCGA-16-1460-01A-21-1898-20	TCGA-16-1460-01A	-0.327644	1.5187	0.995974		TCGA-16-1460-01A	#N/A	#N/A	#N/A	#N/A	#N/A	#N/A
TCGA-06-0210-02A	5.00822	6.14773	2.47476	4.06434	0.0879154	1.17179		TCGA-06-0189-01A-21-1898-20	TCGA-06-0189-01A	-1.56182	0.119274	0.268215		TCGA-06-0189-01A	#N/A	#N/A	#N/A	#N/A	#N/A	#N/A
TCGA-76-4927-01A	4.44466	6.2226	0.760969	4.85545	0.061784	0.569892		TCGA-08-0350-01A-21-1898-20	TCGA-08-0350-01A	0.668274	2.82396	1.54325		TCGA-08-0350-01A	#N/A	#N/A	#N/A	#N/A	#N/A	#N/A
TCGA-06-5858-01A	4.82759	6.68659	3.28944	4.22025	0.129598	0.178878		TCGA-08-0358-01A-21-1898-20	TCGA-08-0358-01A	0.283054	1.93247	2.49277		TCGA-08-0358-01A	#N/A	#N/A	#N/A	#N/A	#N/A	#N/A
TCGA-12-3653-01A	4.70108	6.19247	0.477818	5.08556	0.0520038	0.133089		TCGA-06-0171-01A-11-1898-20	TCGA-06-0171-01A	-2.01188	0.410218	-0.0211142		TCGA-06-0171-01A	#N/A	#N/A	#N/A	#N/A	#N/A	#N/A
TCGA-12-3650-01A	5.09383	6.00266	2.41639	5.45188	0.141593	1.3762		TCGA-26-1440-01A-21-1898-20	TCGA-26-1440-01A	0.208565	2.77721	1.99683		TCGA-26-1440-01A	#N/A	#N/A	#N/A	#N/A	#N/A	#N/A
TCGA-32-2638-01A	5.01753	6.08367	0.993365	5.17607	0.106916	0.351164		TCGA-06-0876-01A-21-1898-20	TCGA-06-0876-01A	0.735105	2.13669	1.44563		TCGA-06-0876-01A	#N/A	#N/A	#N/A	#N/A	#N/A	#N/A
TCGA-12-3652-01A	3.79211	5.61011	0.393355	4.80276	0.0338616	0.0660408		TCGA-08-0390-01A-21-1898-20	TCGA-08-0390-01A	1.02507	2.26384	1.99565		TCGA-08-0390-01A	#N/A	#N/A	#N/A	#N/A	#N/A	#N/A
TCGA-26-5134-01A	4.36621	5.84712	2.77954	4.4141	0.0476638	2.83968		TCGA-12-1599-01A-21-1898-20	TCGA-12-1599-01A	0.771885	2.52059	2.17098		TCGA-12-1599-01A	#N/A	#N/A	#N/A	#N/A	#N/A	#N/A
TCGA-27-2524-01A	4.24556	5.27244	0.771696	4.67927	0.052507	0.532767		TCGA-28-1746-01A-21-1898-20	TCGA-28-1746-01A	0.113098	2.84112	1.97006		TCGA-28-1746-01A	#N/A	#N/A	#N/A	#N/A	#N/A	#N/A
TCGA-06-5856-01A	4.64511	6.09627	1.75536	4.40663	0.106842	2.2122		TCGA-06-0128-01A-11-1898-20	TCGA-06-0128-01A	-1.80455	0.514879	0.137003		TCGA-06-0128-01A	#N/A	#N/A	#N/A	#N/A	#N/A	#N/A
TCGA-06-1804-01A	5.21952	5.49783	3.41573	4.27777	0.337032	1.14061		TCGA-08-0245-01A-11-1898-20	TCGA-08-0245-01A	-1.81857	0.525004	0.129889		TCGA-08-0245-01A	#N/A	#N/A	#N/A	#N/A	#N/A	#N/A
TCGA-26-5136-01B	4.82901	5.61941	2.06535	3.44796	0.213573	1.44637		TCGA-08-0351-01A-21-1898-20	TCGA-08-0351-01A	0.612206	2.89801	2.11684		TCGA-08-0351-01A	#N/A	#N/A	#N/A	#N/A	#N/A	#N/A
TCGA-06-0646-01A	4.99341	6.13255	2.33019	4.56737	0.149917	1.20939		TCGA-08-0359-01A-21-1898-20	TCGA-08-0359-01A	-0.151679	3.25158	2.5358		TCGA-08-0359-01A	#N/A	#N/A	#N/A	#N/A	#N/A	#N/A
TCGA-28-5218-01A	4.98181	5.69061	1.96049	4.52404	0.0357394	0.260421		TCGA-02-0003-01A-21-1898-20	TCGA-02-0003-01A	0.154441	0.256162	0.0415723		TCGA-02-0003-01A	#N/A	#N/A	#N/A	#N/A	#N/A	#N/A
TCGA-02-2483-01A	3.99679	6.21643	2.82235	4.60772	0.0258222	3.24162		TCGA-06-0877-01A-21-1898-20	TCGA-06-0877-01A	0.243822	2.44033	2.43653		TCGA-06-0877-01A	#N/A	#N/A	#N/A	#N/A	#N/A	#N/A
TCGA-06-2562-01A	5.03409	6.07332	2.46753	4.2106	0.211571	0.997902		TCGA-08-0392-01A-21-1898-20	TCGA-08-0392-01A	-0.246617	-0.652403	-0.00724308		TCGA-08-0392-01A	#N/A	#N/A	#N/A	#N/A	#N/A	#N/A
TCGA-27-1837-01A	4.5806	5.95567	2.09686	4.36203	0.123435	0.613433		TCGA-19-0957-01C-21-1898-20	TCGA-19-0957-01C	0.446982	2.6366	1.63899		TCGA-19-0957-01C	#N/A	#N/A	#N/A	#N/A	#N/A	#N/A
TCGA-06-2559-01A	5.02134	6.69831	2.40968	4.40034	0.197411	0.961341		TCGA-28-1750-01A-21-1898-20	TCGA-28-1750-01A	-0.740426	1.57853	0.868758		TCGA-28-1750-01A	#N/A	#N/A	#N/A	#N/A	#N/A	#N/A
TCGA-06-0221-02A	6.56225	6.71512	5.01105	4.45776	0.904126	4.55371		TCGA-06-0154-01A-41-1898-20	TCGA-06-0154-01A	0.55473	1.02768	0.715165		TCGA-06-0154-01A	#N/A	#N/A	#N/A	#N/A	#N/A	#N/A
TCGA-06-0211-01A	4.16311	6.50804	1.32534	5.03787	0.0372235	0.0638113		TCGA-08-0344-01A-21-1898-20	TCGA-08-0344-01A	0.708799	1.15748	0.796985		TCGA-08-0344-01A	#N/A	#N/A	#N/A	#N/A	#N/A	#N/A
TCGA-06-5416-01A	4.99418	6.41023	3.89045	4.56911	0.182819	2.62212		TCGA-08-0352-01A-21-1898-20	TCGA-08-0352-01A	-0.946737	1.10915	0.738388		TCGA-08-0352-01A	#N/A	#N/A	#N/A	#N/A	#N/A	#N/A
TCGA-06-0238-01A	4.83638	5.43062	2.82074	3.8835	0.158579	3.44636		TCGA-08-0360-01A-21-1898-20	TCGA-08-0360-01A	-0.171186	1.81198	1.27592		TCGA-08-0360-01A	#N/A	#N/A	#N/A	#N/A	#N/A	#N/A
TCGA-14-1034-01A	5.11101	6.41834	0.361755	4.64627	0.187334	0.114018		TCGA-02-0004-01A-21-1898-20	TCGA-02-0004-01A	-0.961485	1.30237	0.764046		TCGA-02-0004-01A	#N/A	#N/A	#N/A	#N/A	#N/A	#N/A
TCGA-19-2629-01A	4.88774	6.2269	2.19212	4.59463	0.0486497	1.9059		TCGA-15-1446-01A-21-1898-20	TCGA-15-1446-01A	0.158278	3.43631	3.02214		TCGA-15-1446-01A	#N/A	#N/A	#N/A	#N/A	#N/A	#N/A
TCGA-19-2625-01A	4.72989	5.73304	0.618291	4.42005	0.173876	0.19974		TCGA-12-0691-01A-21-1898-20	TCGA-12-0691-01A	-0.217848	1.06694	1.08781		TCGA-12-0691-01A	#N/A	#N/A	#N/A	#N/A	#N/A	#N/A
TCGA-06-5413-01A	5.18892	6.18476	2.82198	4.4195	0.0744992	1.90374		TCGA-14-0862-01B-21-1898-20	TCGA-14-0862-01B	0.825452	3.08928	1.2755		TCGA-14-0862-01B	#N/A	#N/A	#N/A	#N/A	#N/A	#N/A
TCGA-12-5299-01A	4.10032	6.14094	1.10854	4.48773	0.0980505	0.370067		TCGA-28-1752-01A-21-1898-20	TCGA-28-1752-01A	0.904325	2.44107	1.67974		TCGA-28-1752-01A	#N/A	#N/A	#N/A	#N/A	#N/A	#N/A
TCGA-06-0882-01A	5.23711	5.84653	2.54422	4.09315	0.160629	1.13654		TCGA-06-1802-01A-21-1899-20	TCGA-06-1802-01A	-0.101331	0.997949	1.32323		TCGA-06-1802-01A	#N/A	#N/A	#N/A	#N/A	#N/A	#N/A
TCGA-06-0130-01A	5.34953	6.0986	0.425393	4.12522	0.0748679	0.153862		TCGA-27-1836-01A-21-1899-20	TCGA-27-1836-01A	0.485649	1.57083	0.836134		TCGA-27-1836-01A	#N/A	#N/A	#N/A	#N/A	#N/A	#N/A
TCGA-76-4925-01A	4.62745	6.37161	0.426936	4.15362	0.0534296	0.136684		TCGA-12-3651-01A-22-1899-20	TCGA-12-3651-01A	0.602383	2.21461	1.35122		TCGA-12-3651-01A	#N/A	#N/A	#N/A	#N/A	#N/A	#N/A
TCGA-06-5418-01A	4.1982	6.21465	0.541355	4.10623	0.125704	0.136883		TCGA-41-2573-01A-22-1899-20	TCGA-41-2573-01A	0.0304785	2.95359	2.21188		TCGA-41-2573-01A	#N/A	#N/A	#N/A	#N/A	#N/A	#N/A
TCGA-06-0190-01A	5.03138	5.91144	1.57673	4.76822	0.0596435	0.562513		TCGA-06-1805-01A-21-1899-20	TCGA-06-1805-01A	-0.169496	1.88431	1.14663		TCGA-06-1805-01A	#N/A	#N/A	#N/A	#N/A	#N/A	#N/A
TCGA-27-1835-01A	4.03299	5.80648	0.156271	4.23156	0.0345784	0.152759		TCGA-32-1976-01A-21-1899-20	TCGA-32-1976-01A	0.244372	1.97598	1.54649		TCGA-32-1976-01A	#N/A	#N/A	#N/A	#N/A	#N/A	#N/A
TCGA-28-5216-01A	4.55096	6.60032	2.52949	4.47168	0.114973	2.25548		TCGA-28-2501-01A-21-1899-20	TCGA-28-2501-01A	-0.0073355	1.59697	0.685068		TCGA-28-2501-01A	#N/A	#N/A	#N/A	#N/A	#N/A	#N/A
TCGA-06-0680-11A	7.99295	4.90019	6.05612	3.59907	1.66403	4.73132		TCGA-41-2575-01A-22-1899-20	TCGA-41-2575-01A	0.533203	2.35701	1.7443		TCGA-41-2575-01A	#N/A	#N/A	#N/A	#N/A	#N/A	#N/A
TCGA-06-5411-01A	6.33378	5.58188	4.36152	3.94383	0.807452	3.60069		TCGA-28-5214-01A-21-1899-20	TCGA-28-5214-01A	0.62754	2.38591	1.38551		TCGA-28-5214-01A	#N/A	#N/A	#N/A	#N/A	#N/A	#N/A
TCGA-27-2519-01A	5.07661	6.23401	2.77004	3.43892	0.130746	3.79949		TCGA-06-1806-01A-11-1899-20	TCGA-06-1806-01A	0.498243	2.50708	1.88672		TCGA-06-1806-01A	#N/A	#N/A	#N/A	#N/A	#N/A	#N/A
TCGA-28-5213-01A	4.84695	5.46171	0.733451	3.53674	0.224269	0.413048		TCGA-32-1978-01A-21-1899-20	TCGA-32-1978-01A	0.0738604	0.931909	0.766895		TCGA-32-1978-01A	#N/A	#N/A	#N/A	#N/A	#N/A	#N/A
TCGA-28-5209-01A	4.83426	6.54209	1.10163	5.3022	0.0478801	0.142211		TCGA-41-3392-01A-22-1899-20	TCGA-41-3392-01A	0.45846	1.53237	1.15335		TCGA-41-3392-01A	#N/A	#N/A	#N/A	#N/A	#N/A	#N/A
TCGA-76-4926-01B	5.3744	6.29005	2.29698	4.25877	0.226616	1.1568		TCGA-19-1790-01B-21-1899-20	TCGA-19-1790-01B	-0.380062	1.20308	0.684584		TCGA-19-1790-01B	#N/A	#N/A	#N/A	#N/A	#N/A	#N/A
TCGA-06-0219-01A	4.41306	4.52038	1.44198	3.32841	0.0753015	1.08577		TCGA-41-3393-01A-22-1899-20	TCGA-41-3393-01A	-0.107897	1.41366	1.18942		TCGA-41-3393-01A	#N/A	#N/A	#N/A	#N/A	#N/A	#N/A
TCGA-02-2486-01A	5.2487	5.96197	0.722836	4.27992	0.0998913	0.0449473		TCGA-19-4068-01A-22-1899-20	TCGA-19-4068-01A	0.954952	2.23074	1.12392		TCGA-19-4068-01A	#N/A	#N/A	#N/A	#N/A	#N/A	#N/A
TCGA-06-0190-02A	4.91064	6.08589	1.13709	4.67544	0.00819453	0.123818		TCGA-06-5415-01A-21-1899-20	TCGA-06-5415-01A	2.12254	1.31277	1.03911		TCGA-06-5415-01A	#N/A	#N/A	#N/A	#N/A	#N/A	#N/A
TCGA-06-0750-01A	4.36822	5.24447	1.16533	4.08077	0.147368	0.119371		TCGA-81-5910-01A-21-1899-20	TCGA-81-5910-01A	0.6937	2.2737	2.04166		TCGA-81-5910-01A	#N/A	#N/A	#N/A	#N/A	#N/A	#N/A
TCGA-15-1444-01A	4.09227	6.45179	2.28626	4.17229	0.0394804	2.65609		TCGA-32-1986-01A-21-1899-20	TCGA-32-1986-01A	0.181291	1.97923	1.49371		TCGA-32-1986-01A	#N/A	#N/A	#N/A	#N/A	#N/A	#N/A
TCGA-27-1832-01A	5.15964	5.70217	1.11862	4.52548	0.206177	0.689451		TCGA-27-2518-01A-22-1899-20	TCGA-27-2518-01A	0.0179852	1.13153	0.552642		TCGA-27-2518-01A	#N/A	#N/A	#N/A	#N/A	#N/A	#N/A
TCGA-19-0957-02A	4.9543	5.9851	2.9068	4.23006	0.171938	2.2644		TCGA-12-3646-01A-22-1899-20	TCGA-12-3646-01A	-0.159159	1.76424	1.55627		TCGA-12-3646-01A	#N/A	#N/A	#N/A	#N/A	#N/A	#N/A
TCGA-06-0174-01A	4.7856	6.433	3.52072	5.1039	0.10926	3.51691		TCGA-12-5301-01A-21-1899-20	TCGA-12-5301-01A	0.65478	1.77012	1.88401		TCGA-12-5301-01A	#N/A	#N/A	#N/A	#N/A	#N/A	#N/A
TCGA-12-0616-01A	4.12137	6.36322	2.74524	4.42204	0.0969832	2.27153		TCGA-19-5947-01A-13-1899-20	TCGA-19-5947-01A	-1.24008	1.05274	0.0997866		TCGA-19-5947-01A	#N/A	#N/A	#N/A	#N/A	#N/A	#N/A
TCGA-27-1834-01A	5.36906	6.44107	2.30549	4.28965	0.228082	1.3098		TCGA-32-1987-01A-21-1899-20	TCGA-32-1987-01A	0.290458	1.17731	1.08838		TCGA-32-1987-01A	#N/A	#N/A	#N/A	#N/A	#N/A	#N/A
TCGA-32-1970-01A	4.81632	6.14483	2.52172	4.5278	0.180298	1.63362		TCGA-06-2566-01A-22-1899-20	TCGA-06-2566-01A	1.03153	2.78723	2.04864		TCGA-06-2566-01A	#N/A	#N/A	#N/A	#N/A	#N/A	#N/A
TCGA-14-0736-02A	5.37817	4.91859	2.09618	3.02175	0.187886	1.36483		TCGA-12-3649-01A-22-1899-20	TCGA-12-3649-01A	0.300373	3.07598	2.7759		TCGA-12-3649-01A	#N/A	#N/A	#N/A	#N/A	#N/A	#N/A
TCGA-28-5215-01A	4.88679	6.78465	2.9241	4.66327	0.231256	3.44287		TCGA-32-4210-01A-22-1899-20	TCGA-32-4210-01A	0.908022	2.88547	2.17997		TCGA-32-4210-01A	#N/A	#N/A	#N/A	#N/A	#N/A	#N/A
TCGA-06-0132-01A	5.84545	5.56833	3.26971	3.49308	0.299699	2.41286		TCGA-27-1833-01A-21-1899-20	TCGA-27-1833-01A	0.372698	1.71718	0.238088		TCGA-27-1833-01A	#N/A	#N/A	#N/A	#N/A	#N/A	#N/A
TCGA-06-5408-01A	4.76912	6.4423	1.93471	5.10407	0.210372	1.15732		TCGA-32-1991-01A-21-1899-20	TCGA-32-1991-01A	0.384845	1.47152	1.68659		TCGA-32-1991-01A	#N/A	#N/A	#N/A	#N/A	#N/A	#N/A
TCGA-28-5208-01A	4.57442	6.2824	0.804614	5.0759	0.0238637	0.553045		TCGA-19-5950-01A-13-1900-20	TCGA-19-5950-01A	0.595469	1.61161	1.04897		TCGA-19-5950-01A	#N/A	#N/A	#N/A	#N/A	#N/A	#N/A
TCGA-06-0211-01B	4.17647	6.75429	2.68057	5.02632	0.168557	0.484296		TCGA-76-6285-01A-13-1900-20	TCGA-76-6285-01A	0.590427	2.30016	1.22226		TCGA-76-6285-01A	#N/A	#N/A	#N/A	#N/A	#N/A	#N/A
TCGA-28-2509-01A	4.28454	6.18831	1.84637	4.86533	0.48187	0.148361		TCGA-74-6581-01A-13-1900-20	TCGA-74-6581-01A	0.449422	3.08791	2.12358		TCGA-74-6581-01A	#N/A	#N/A	#N/A	#N/A	#N/A	#N/A
TCGA-19-5960-01A	5.1303	6.31574	4.06827	4.67066	0.228061	3.28896		TCGA-76-6664-01A-13-1900-20	TCGA-76-6664-01A	0.830474	3.7825	2.60132		TCGA-76-6664-01A	#N/A	#N/A	#N/A	#N/A	#N/A	#N/A
TCGA-41-5651-01A	5.50138	6.13786	4.03455	4.7464	0.257471	5.25517		TCGA-06-6700-01A-23-1900-20	TCGA-06-6700-01A	0.264459	0.969923	0.377338		TCGA-06-6700-01A	#N/A	#N/A	#N/A	#N/A	#N/A	#N/A
TCGA-27-2521-01A	3.85997	5.2165	2.27828	4.80672	0.0762585	1.61267		TCGA-19-5951-01A-13-1900-20	TCGA-19-5951-01A	0.633547	1.22532	0.374245		TCGA-19-5951-01A	#N/A	#N/A	#N/A	#N/A	#N/A	#N/A
TCGA-28-2513-01A	4.74227	5.65606	0.402162	4.56577	0.0653648	0.146658		TCGA-19-5953-01B-23-1900-20	TCGA-19-5953-01B	-0.806156	1.32044	0.722987		TCGA-19-5953-01B	#N/A	#N/A	#N/A	#N/A	#N/A	#N/A
TCGA-06-0743-01A	4.30957	5.11632	0.884519	4.61144	0.101237	0.118306		TCGA-06-6388-01A-23-1900-20	TCGA-06-6388-01A	0.894805	2.5449	2.30562		TCGA-06-6388-01A	#N/A	#N/A	#N/A	#N/A	#N/A	#N/A
TCGA-76-4932-01A	3.50016	6.24546	0.954772	4.50641	0	0.118983		TCGA-74-6584-01A-13-1900-20	TCGA-74-6584-01A	0.184116	2.57918	2.06509		TCGA-74-6584-01A	#N/A	#N/A	#N/A	#N/A	#N/A	#N/A
TCGA-08-0386-01A	5.276	5.99241	3.61716	4.1707	0.409173	1.69916		TCGA-76-6660-01A-13-1900-20	TCGA-76-6660-01A	-0.657862	1.39143	0.637278		TCGA-76-6660-01A	#N/A	#N/A	#N/A	#N/A	#N/A	#N/A
TCGA-06-0749-01A	5.33139	4.98801	2.7296	4.2039	0.124074	1.72602		TCGA-06-6701-01A-13-1900-20	TCGA-06-6701-01A	0.160097	0.782367	0.14216		TCGA-06-6701-01A	#N/A	#N/A	#N/A	#N/A	#N/A	#N/A
TCGA-27-1831-01A	3.75009	5.82058	0.338956	2.481	0.0452558	0.138475		TCGA-19-5952-01A-13-1900-20	TCGA-19-5952-01A	-0.0517717	1.29762	0.783505		TCGA-19-5952-01A	#N/A	#N/A	#N/A	#N/A	#N/A	#N/A
TCGA-06-0139-01A	4.54909	5.48271	0.969271	3.13421	0.0227423	0.369874		TCGA-26-6173-01A-13-1900-20	TCGA-26-6173-01A	0.667901	3.09494	2.34778		TCGA-26-6173-01A	#N/A	#N/A	#N/A	#N/A	#N/A	#N/A
TCGA-19-1389-02A	5.01842	6.04023	0.755206	3.92411	0.0250052	1.01845		TCGA-06-6389-01A-23-1900-20	TCGA-06-6389-01A	0.273314	1.43833	0.929789		TCGA-06-6389-01A	#N/A	#N/A	#N/A	#N/A	#N/A	#N/A
								TCGA-06-6693-01A-13-1900-20	TCGA-06-6693-01A	1.25189	0.542832	0.451026		TCGA-06-6693-01A	#N/A	#N/A	#N/A	#N/A	#N/A	#N/A
								TCGA-19-5954-01A-13-1900-20	TCGA-19-5954-01A	0.439293	0.802023	0.485752		TCGA-19-5954-01A	#N/A	#N/A	#N/A	#N/A	#N/A	#N/A
								TCGA-26-6174-01A-13-1900-20	TCGA-26-6174-01A	0.658492	2.17306	1.59909		TCGA-26-6174-01A	#N/A	#N/A	#N/A	#N/A	#N/A	#N/A
								TCGA-06-6390-01A-23-1900-20	TCGA-06-6390-01A	0.598433	2.16617	1.7901		TCGA-06-6390-01A	#N/A	#N/A	#N/A	#N/A	#N/A	#N/A
								TCGA-76-6656-01A-13-1900-20	TCGA-76-6656-01A	0.986324	1.6302	1.51685		TCGA-76-6656-01A	#N/A	#N/A	#N/A	#N/A	#N/A	#N/A
								TCGA-06-6694-01A-13-1900-20	TCGA-06-6694-01A	0.474601	2.72139	2.08621		TCGA-06-6694-01A	#N/A	#N/A	#N/A	#N/A	#N/A	#N/A
								TCGA-19-5955-01A-13-1900-20	TCGA-19-5955-01A	0.21668	3.3751	2.65705		TCGA-19-5955-01A	#N/A	#N/A	#N/A	#N/A	#N/A	#N/A
								TCGA-76-6192-01A-13-1900-20	TCGA-76-6192-01A	0.472055	2.24594	1.32824		TCGA-76-6192-01A	#N/A	#N/A	#N/A	#N/A	#N/A	#N/A
								TCGA-06-6391-01A-23-1900-20	TCGA-06-6391-01A	0.737894	1.18894	0.924174		TCGA-06-6391-01A	#N/A	#N/A	#N/A	#N/A	#N/A	#N/A
								TCGA-76-6657-01A-13-1900-20	TCGA-76-6657-01A	0.713189	2.49242	1.25944		TCGA-76-6657-01A	#N/A	#N/A	#N/A	#N/A	#N/A	#N/A
								TCGA-06-6695-01A-13-1900-20	TCGA-06-6695-01A	0.0987751	1.61378	1.23847		TCGA-06-6695-01A	#N/A	#N/A	#N/A	#N/A	#N/A	#N/A
								TCGA-06-1086-01A-03-1900-20	TCGA-06-1086-01A	0.433656	0.403818	0.67271		TCGA-06-1086-01A	#N/A	#N/A	#N/A	#N/A	#N/A	#N/A
								TCGA-19-5956-01A-13-1900-20	TCGA-19-5956-01A	0.320422	2.33664	1.29367		TCGA-19-5956-01A	#N/A	#N/A	#N/A	#N/A	#N/A	#N/A
								TCGA-76-6193-01A-13-1900-20	TCGA-76-6193-01A	-0.18929	1.26442	1.01788		TCGA-76-6193-01A	#N/A	#N/A	#N/A	#N/A	#N/A	#N/A
								TCGA-74-6575-01A-13-1900-20	TCGA-74-6575-01A	0.550404	3.1363	2.06491		TCGA-74-6575-01A	#N/A	#N/A	#N/A	#N/A	#N/A	#N/A
								TCGA-76-6661-01A-13-1900-20	TCGA-76-6661-01A	-2.32816	-0.628599	-0.11796		TCGA-76-6661-01A	#N/A	#N/A	#N/A	#N/A	#N/A	#N/A
								TCGA-06-6697-01A-13-1900-20	TCGA-06-6697-01A	0.667381	1.64753	1.23013		TCGA-06-6697-01A	#N/A	#N/A	#N/A	#N/A	#N/A	#N/A
								TCGA-06-1087-01A-03-1900-20	TCGA-06-1087-01A	1.41658	3.00073	2.01222		TCGA-06-1087-01A	#N/A	#N/A	#N/A	#N/A	#N/A	#N/A
								TCGA-19-2631-01A-03-1900-20	TCGA-19-2631-01A	0.0831363	0.733671	0.971759		TCGA-19-2631-01A	#N/A	#N/A	#N/A	#N/A	#N/A	#N/A
								TCGA-19-5958-01A-13-1900-20	TCGA-19-5958-01A	0.526406	1.11811	0.507202		TCGA-19-5958-01A	#N/A	#N/A	#N/A	#N/A	#N/A	#N/A
								TCGA-74-6577-01A-13-1900-20	TCGA-74-6577-01A	0.333221	2.99891	2.34039		TCGA-74-6577-01A	#N/A	#N/A	#N/A	#N/A	#N/A	#N/A
								TCGA-76-6662-01A-13-1900-20	TCGA-76-6662-01A	0.264111	3.32217	2.36335		TCGA-76-6662-01A	#N/A	#N/A	#N/A	#N/A	#N/A	#N/A
								TCGA-06-6698-01A-13-1900-20	TCGA-06-6698-01A	0.724959	0.710842	0.541975		TCGA-06-6698-01A	#N/A	#N/A	#N/A	#N/A	#N/A	#N/A
								TCGA-74-6573-01A-03-1900-20	TCGA-74-6573-01A	-0.316735	0.718021	0.655554		TCGA-74-6573-01A	#N/A	#N/A	#N/A	#N/A	#N/A	#N/A
								TCGA-19-5959-01A-13-1900-20	TCGA-19-5959-01A	0.303076	1.94246	1.30663		TCGA-19-5959-01A	#N/A	#N/A	#N/A	#N/A	#N/A	#N/A
								TCGA-76-6283-01A-13-1900-20	TCGA-76-6283-01A	1.12397	1.831	1.02477		TCGA-76-6283-01A	#N/A	#N/A	#N/A	#N/A	#N/A	#N/A
								TCGA-74-6578-01A-13-1900-20	TCGA-74-6578-01A	0.773591	1.71387	1.43273		TCGA-74-6578-01A	#N/A	#N/A	#N/A	#N/A	#N/A	#N/A
								TCGA-76-6663-01A-13-1900-20	TCGA-76-6663-01A	0.906549	1.66652	1.11921		TCGA-76-6663-01A	#N/A	#N/A	#N/A	#N/A	#N/A	#N/A
								TCGA-06-6699-01A-13-1900-20	TCGA-06-6699-01A	0.435841	0.500122	0.361967		TCGA-06-6699-01A	#N/A	#N/A	#N/A	#N/A	#N/A	#N/A
								TCGA-06-0126-01A-03-1900-20	TCGA-06-0126-01A	0.769236	2.18323	1.72235		TCGA-06-0126-01A	#N/A	#N/A	#N/A	#N/A	#N/A	#N/A
