# Supplementary material for: Comprehensive analysis of the prognostic implications and functional exploration of PAK gene family in human cancer
Source: Cancer Cell Int. 2022 Sep 5;22:275. doi: 10.1186/s12935-022-02689-6 (PMC9442929; doi:10.1186/s12935-022-02689-6)
Supplement: Supplementary file 33 — Additional file 33: Table S9. PCR in NHA, U87MG, and LN229 for detect AKT1 and PAK1 mRNA levels. [file 12935_2022_2689_MOESM33_ESM.xlsx]

## Sheet: Sheet1
	NHA	U87MG	LN229
GAPDH-1	17.26	16.59	17.64		∆∆Ct	NHA	U87MG	LN229		2^-∆∆Ct	NHA	U87MG	LN229
GAPDH-2	17.18	16.53	17.59		PAK1-1	0.155	2.745	1.8025		PAK1-1	0.898132	0.149167	0.286677
GAPDH-3	17.28	16.72	17.34		PAK1-2	-0.085	2.535	2.0225		PAK1-2	1.06069	0.17254	0.246131
GAPDH-4	17.32	16.68	17.64		PAK1-3	-0.005	2.565	1.6425		PAK1-3	1.00347	0.168989	0.320301
PAK1-1	20.68	22.64	22.62		PAK1-4	-0.065	2.595	1.7625		PAK1-4	1.04608	0.165511	0.294737
PAK1-2	20.44	22.43	22.84		AKT1-1	-0.0825	-1.2425	-0.795		AKT1-1	1.05885	2.36608	1.73508
PAK1-3	20.52	22.46	22.46		AKT1-2	0.0475	-1.3525	-0.605		AKT1-2	0.967612	2.55354	1.52098
PAK1-4	20.46	22.49	22.58		AKT1-3	0.0975	-1.3025	-0.345		AKT1-3	0.934651	2.46656	1.27015
AKT1-1	23.06	21.27	22.64		AKT1-4	-0.0625	-1.0825	-0.405		AKT1-4	1.04427	2.1177	1.32409
AKT1-2	23.19	21.16	22.83
AKT1-3	23.24	21.21	23.09
AKT1-4	23.08	21.43	23.03
Average	17.26	16.63	17.5525
∆Ct	3.42	6.01	5.0675
	3.18	5.8	5.2875
	3.26	5.83	4.9075
	3.2	5.86	5.0275
	5.8	4.64	5.0875
	5.93	4.53	5.2775
	5.98	4.58	5.5375
	5.82	4.8	5.4775
Average	3.265
	5.8825
