# Supplementary material for: Comprehensive analysis of the prognostic implications and functional exploration of PAK gene family in human cancer
Source: Cancer Cell Int. 2022 Sep 5;22:275. doi: 10.1186/s12935-022-02689-6 (PMC9442929; doi:10.1186/s12935-022-02689-6)
Supplement: Supplementary file 34 — Additional file 34: Table S10. Correlation between PAK mRNAs and protein levels of Akt, Akt pS473, and Akt pT308 in all GBM cell lines; Correlation between PAK1 and AKT1 mRNAs in all tumor cell lines and GBM cell lines. [file 12935_2022_2689_MOESM34_ESM.xlsx]

## Sheet: Sheet1
GBM																											V1	V2	AKT1 mRNA	PAK1 mRNA			ALL	V1	V2	AKT1 mRNA	PAK1 mRNA	Cor		GBM	V1	V2	AKT1 mRNA	PAK1 mRNA	Cor
AKT Protein	V1	V2	V3		AKT pT308	V1	V2	V3		AKT pS473	V1	V2	V3		PAK1 mRNA	V1	V2	V3			AKT Protein	AKT pT308	AKT pS473	PAK1 mRNA		DMS.53	SCLC	Tumor	5.95722	6.62308	0.138538		DMS.53	SCLC	Tumor	5.95722	6.62308	0.138538		LN.229	GBM	Tumor	6.98356	5.98094	0.170567
LN.229	GBM	Tumor	1.0006		LN.229	GBM	Tumor	1.02134		LN.229	GBM	Tumor	1.25023		LN.229	GBM	Tumor	5.98094		LN.229	1.0006	1.02134	1.25023	5.98094		NCI.H1694	SCLC	Tumor	8.18631	5.46107			NCI.H1694	SCLC	Tumor	8.18631	5.46107			SF126	GBM	Tumor	7.57016	5.15987
SF126	GBM	Tumor	0.435016		SF126	GBM	Tumor	1.06525		SF126	GBM	Tumor	2.40131		SF126	GBM	Tumor	5.15987		SF126	0.435016	1.06525	2.40131	5.15987		NCI.H1184	SCLC	Tumor	6.98037	6.0798			NCI.H1184	SCLC	Tumor	6.98037	6.0798			TM.31	GBM	Tumor	7.17582	3.51728
Becker	GBM	Tumor	-0.112161		Becker	GBM	Tumor	0.872123		Becker	GBM	Tumor	1.45018		TM.31	GBM	Tumor	3.51728		TM.31	0.250693	0.296907	0.547267	3.51728		NCI.H2227	SCLC	Tumor	7.06684	5.75729			NCI.H2227	SCLC	Tumor	7.06684	5.75729			SF.295	GBM	Tumor	7.30551	3.78136
TM.31	GBM	Tumor	0.250693		TM.31	GBM	Tumor	0.296907		TM.31	GBM	Tumor	0.547267		SF.295	GBM	Tumor	3.78136		SF.295	0.259856	1.18335	2.46852	3.78136		NCI.H510	SCLC	Tumor	7.41388	4.55152			NCI.H510	SCLC	Tumor	7.41388	4.55152			M059K	GBM	Tumor	7.65693	5.12267
SF.295	GBM	Tumor	0.259856		SF.295	GBM	Tumor	1.18335		SF.295	GBM	Tumor	2.46852		M059K	GBM	Tumor	5.12267		M059K	0.648242	2.69707	3.05495	5.12267		NCI.H2066	SCLC	Tumor	6.32894	5.10182			NCI.H2066	SCLC	Tumor	6.32894	5.10182			GOS.3	GBM	Tumor	6.14098	4.81967
M059K	GBM	Tumor	0.648242		M059K	GBM	Tumor	2.69707		M059K	GBM	Tumor	3.05495		GOS.3	GBM	Tumor	4.81967		GOS.3	0.06973	3.13494	3.68173	4.81967		NCI.H1341	SCLC	Tumor	6.36405	3.852			NCI.H1341	SCLC	Tumor	6.36405	3.852			KNS.60	GBM	Tumor	6.79116	4.88411
GOS.3	GBM	Tumor	0.06973		GOS.3	GBM	Tumor	3.13494		GOS.3	GBM	Tumor	3.68173		KNS.60	GBM	Tumor	4.88411		KNS.60	0.407411	0.111455	1.34578	4.88411		NCI.H2029	SCLC	Tumor	5.71918	5.34056			NCI.H2029	SCLC	Tumor	5.71918	5.34056			KNS.81	GBM	Tumor	5.96694	4.56194
KNS.60	GBM	Tumor	0.407411		KNS.60	GBM	Tumor	0.111455		KNS.60	GBM	Tumor	1.34578		KNS.81	GBM	Tumor	4.56194		KNS.81	-0.334784	1.18597	1.73351	4.56194		HCC.33	SCLC	Tumor	6.82693	5.73606			HCC.33	SCLC	Tumor	6.82693	5.73606			KG.1.C	GBM	Tumor	5.72928	5.21762
KNS.81	GBM	Tumor	-0.334784		KNS.81	GBM	Tumor	1.18597		KNS.81	GBM	Tumor	1.73351		KG.1.C	GBM	Tumor	5.21762		KG.1.C	-0.344568	-0.530561	-1.04111	5.21762		COLO.668	SCLC	Tumor	7.03782	3.61824			COLO.668	SCLC	Tumor	7.03782	3.61824			AM.38	GBM	Tumor	7.48357	6.10392
KG.1.C	GBM	Tumor	-0.344568		KG.1.C	GBM	Tumor	-0.530561		KG.1.C	GBM	Tumor	-1.04111		AM.38	GBM	Tumor	6.10392		AM.38	0.911555	-0.782442	-0.362313	6.10392		NCI.H1963	SCLC	Tumor	7.44997	5.75221			NCI.H1963	SCLC	Tumor	7.44997	5.75221			CAS.1	GBM	Tumor	6.52482	4.67638
AM.38	GBM	Tumor	0.911555		AM.38	GBM	Tumor	-0.782442		AM.38	GBM	Tumor	-0.362313		CAS.1	GBM	Tumor	4.67638		CAS.1	-0.242812	1.89431	2.08935	4.67638		SW.1271	SCLC	Tumor	7.74752	5.31107			SW.1271	SCLC	Tumor	7.74752	5.31107			YH.13	GBM	Tumor	6.96728	4.58256
CAS.1	GBM	Tumor	-0.242812		CAS.1	GBM	Tumor	1.89431		CAS.1	GBM	Tumor	2.08935		YH.13	GBM	Tumor	4.58256		YH.13	-0.093459	0.22654	0.455628	4.58256		NCI.H82	SCLC	Tumor	5.48929	5.18507			NCI.H82	SCLC	Tumor	5.48929	5.18507			DK.MG	GBM	Tumor	6.89409	5.34979
YH.13	GBM	Tumor	-0.093459		YH.13	GBM	Tumor	0.22654		YH.13	GBM	Tumor	0.455628		DK.MG	GBM	Tumor	5.34979		DK.MG	0.432681	0.282045	0.556802	5.34979		DMS.454	SCLC	Tumor	6.67539	5.03034			DMS.454	SCLC	Tumor	6.67539	5.03034			U.118.MG	GBM	Tumor	6.69167	5.30159
DK.MG	GBM	Tumor	0.432681		DK.MG	GBM	Tumor	0.282045		DK.MG	GBM	Tumor	0.556802		U.118.MG	GBM	Tumor	5.30159		U.118.MG	0.658417	2.13229	3.013	5.30159		COR.L47	SCLC	Tumor	7.92778	5.05355			COR.L47	SCLC	Tumor	7.92778	5.05355			GB.1	GBM	Tumor	6.80142	3.97453
U.118.MG	GBM	Tumor	0.658417		U.118.MG	GBM	Tumor	2.13229		U.118.MG	GBM	Tumor	3.013		GB.1	GBM	Tumor	3.97453		GB.1	0.406344	1.07983	2.3709	3.97453		DMS.273	SCLC	Tumor	6.18269	4.39094			DMS.273	SCLC	Tumor	6.18269	4.39094			SNU.489	GBM	Tumor	5.84373	3.8846
GB.1	GBM	Tumor	0.406344		GB.1	GBM	Tumor	1.07983		GB.1	GBM	Tumor	2.3709		SNU.489	GBM	Tumor	3.8846		SNU.489	-0.637536	-0.300806	0.189276	3.8846		COR.L311	SCLC	Tumor	6.6595	2.08746			COR.L311	SCLC	Tumor	6.6595	2.08746			SNU.201	GBM	Tumor	6.52419	4.54473
SNU.489	GBM	Tumor	-0.637536		SNU.489	GBM	Tumor	-0.300806		SNU.489	GBM	Tumor	0.189276		SNU.201	GBM	Tumor	4.54473		SNU.201	-0.106907	0.979188	1.33204	4.54473		NCI.H2286	SCLC	Tumor	7.09497	4.8505			NCI.H2286	SCLC	Tumor	7.09497	4.8505			SNU.466	GBM	Tumor	7.26959	3.55949
SNU.201	GBM	Tumor	-0.106907		SNU.201	GBM	Tumor	0.979188		SNU.201	GBM	Tumor	1.33204		SNU.466	GBM	Tumor	3.55949		SNU.466	0.723371	1.23587	2.50728	3.55949		NCI.H1339	SCLC	Tumor	7.18606	5.6314			NCI.H1339	SCLC	Tumor	7.18606	5.6314			SNU.1105	GBM	Tumor	7.38603	5.00764
SNU.466	GBM	Tumor	0.723371		SNU.466	GBM	Tumor	1.23587		SNU.466	GBM	Tumor	2.50728		SNU.1105	GBM	Tumor	5.00764		SNU.1105	0.524904	0.676736	1.5748	5.00764		NCI.H2081	SCLC	Tumor	7.20828	5.24222			NCI.H2081	SCLC	Tumor	7.20828	5.24222			SNU.738	GBM	Tumor	6.46744	4.29278
SNU.1105	GBM	Tumor	0.524904		SNU.1105	GBM	Tumor	0.676736		SNU.1105	GBM	Tumor	1.5748		SNU.738	GBM	Tumor	4.29278		SNU.738	0.178803	-0.091013	-0.491193	4.29278		NCI.H1092	SCLC	Tumor	7.09698	6.22091			NCI.H1092	SCLC	Tumor	7.09698	6.22091			SNU.626	GBM	Tumor	6.24012	4.73118
SNU.738	GBM	Tumor	0.178803		SNU.738	GBM	Tumor	-0.091013		SNU.738	GBM	Tumor	-0.491193		SNU.626	GBM	Tumor	4.73118		SNU.626	-0.944389	1.58001	2.79033	4.73118		NCI.H1105	SCLC	Tumor	7.51869	6.07361			NCI.H1105	SCLC	Tumor	7.51869	6.07361			CCF.STTG1	GBM	Tumor	7.76115	4.09085
SNU.626	GBM	Tumor	-0.944389		SNU.626	GBM	Tumor	1.58001		SNU.626	GBM	Tumor	2.79033		CCF.STTG1	GBM	Tumor	4.09085		CCF.STTG1	0.219325	2.84566	3.19977	4.09085		NCI.H1436	SCLC	Tumor	6.72874	6.30049			NCI.H1436	SCLC	Tumor	6.72874	6.30049			SW.1088	GBM	Tumor	7.19938	5.67214
CCF.STTG1	GBM	Tumor	0.219325		CCF.STTG1	GBM	Tumor	2.84566		CCF.STTG1	GBM	Tumor	3.19977		SW.1088	GBM	Tumor	5.67214		SW.1088	0.444482	2.94997	3.42396	5.67214		NCI.H1876	SCLC	Tumor	6.3856	6.23458			NCI.H1876	SCLC	Tumor	6.3856	6.23458			LN.18	GBM	Tumor	7.88234	4.69711
SW.1088	GBM	Tumor	0.444482		SW.1088	GBM	Tumor	2.94997		SW.1088	GBM	Tumor	3.42396		LN.18	GBM	Tumor	4.69711		LN.18	0.799697	0.766437	1.10401	4.69711		COR.L24	SCLC	Tumor	6.73186	5.99503			COR.L24	SCLC	Tumor	6.73186	5.99503			T98G	GBM	Tumor	6.99164	4.41481
LN.18	GBM	Tumor	0.799697		LN.18	GBM	Tumor	0.766437		LN.18	GBM	Tumor	1.10401		T98G	GBM	Tumor	4.41481		T98G	0.18443	3.236	3.31281	4.41481		COR.L88	SCLC	Tumor	7.03606	4.98914			COR.L88	SCLC	Tumor	7.03606	4.98914			DBTRG.05MG	GBM	Tumor	6.88606	5.61765
T98G	GBM	Tumor	0.18443		T98G	GBM	Tumor	3.236		T98G	GBM	Tumor	3.31281		DBTRG.05MG	GBM	Tumor	5.61765		DBTRG.05MG	0.423993	1.48272	1.95021	5.61765		COR.L95	SCLC	Tumor	7.33709	5.02414			COR.L95	SCLC	Tumor	7.33709	5.02414			A172	GBM	Tumor	6.43896	5.55919
DBTRG.05MG	GBM	Tumor	0.423993		DBTRG.05MG	GBM	Tumor	1.48272		DBTRG.05MG	GBM	Tumor	1.95021		A172	GBM	Tumor	5.55919		A172	1.00537	2.7071	2.8358	5.55919		COR.L279	SCLC	Tumor	6.5601	5.52701			COR.L279	SCLC	Tumor	6.5601	5.52701			GMS.10	GBM	Tumor	7.85144	4.88899
A172	GBM	Tumor	1.00537		A172	GBM	Tumor	2.7071		A172	GBM	Tumor	2.8358		GMS.10	GBM	Tumor	4.88899		GMS.10	0.628877	2.08586	1.78239	4.88899		DMS.153	SCLC	Tumor	6.22226	5.49057			DMS.153	SCLC	Tumor	6.22226	5.49057			X42.MG.BA	GBM	Tumor	7.5127	4.97039
GMS.10	GBM	Tumor	0.628877		GMS.10	GBM	Tumor	2.08586		GMS.10	GBM	Tumor	1.78239		X42.MG.BA	GBM	Tumor	4.97039		X42.MG.BA	0.498819	0.909069	1.3856	4.97039		NCI.H1048	SCLC	Tumor	7.52771	5.72765			NCI.H1048	SCLC	Tumor	7.52771	5.72765			YKG1	GBM	Tumor	6.88472	4.66846
X42.MG.BA	GBM	Tumor	0.498819		X42.MG.BA	GBM	Tumor	0.909069		X42.MG.BA	GBM	Tumor	1.3856		YKG1	GBM	Tumor	4.66846		YKG1	0.332437	2.6856	2.88668	4.66846		NCI.H1618	SCLC	Tumor	7.02403	6.63256			NCI.H1618	SCLC	Tumor	7.02403	6.63256			U.251.MG	GBM	Tumor	6.42911	4.42291
YKG1	GBM	Tumor	0.332437		YKG1	GBM	Tumor	2.6856		YKG1	GBM	Tumor	2.88668		U.251.MG	GBM	Tumor	4.42291		U.251.MG	0.571097	3.03356	3.40221	4.42291		NCI.H69	SCLC	Tumor	7.15583	6.44344			NCI.H69	SCLC	Tumor	7.15583	6.44344			KS.1	GBM	Tumor	6.88496	4.76288
U.251.MG	GBM	Tumor	0.571097		U.251.MG	GBM	Tumor	3.03356		U.251.MG	GBM	Tumor	3.40221		KS.1	GBM	Tumor	4.76288		KS.1	-0.090172	0.548428	0.858784	4.76288		NCI.H1930	SCLC	Tumor	6.90472	5.81121			NCI.H1930	SCLC	Tumor	6.90472	5.81121			X8.MG.BA	GBM	Tumor	6.01279	5.59574
KS.1	GBM	Tumor	-0.090172		KS.1	GBM	Tumor	0.548428		KS.1	GBM	Tumor	0.858784		X8.MG.BA	GBM	Tumor	5.59574		X8.MG.BA	-0.634421	-0.013838	0.074807	5.59574		NCI.H1836	SCLC	Tumor	6.57395	5.25134			NCI.H1836	SCLC	Tumor	6.57395	5.25134			U.87.MG	GBM	Tumor	6.74389	4.62585
X8.MG.BA	GBM	Tumor	-0.634421		X8.MG.BA	GBM	Tumor	-0.013838		X8.MG.BA	GBM	Tumor	0.074807		U.87.MG	GBM	Tumor	4.62585		U.87.MG	0.337607	3.03497	3.42157	4.62585		DMS.114	SCLC	Tumor	5.85873	4.6605			DMS.114	SCLC	Tumor	5.85873	4.6605			LN.443	GBM	Tumor	8.04761	5.43663
U.87.MG	GBM	Tumor	0.337607		U.87.MG	GBM	Tumor	3.03497		U.87.MG	GBM	Tumor	3.42157		LN.443	GBM	Tumor	5.43663		SF268	0.447237	0.584317	1.10551	4.91791		NCI.H524	SCLC	Tumor	6.54874	4.43563			NCI.H524	SCLC	Tumor	6.54874	4.43563			LN.235	GBM	Tumor	7.10842	4.12928
SF268	GBM	Tumor	0.447237		SF268	GBM	Tumor	0.584317		SF268	GBM	Tumor	1.10551		LN.235	GBM	Tumor	4.12928		SNB75	0.265967	2.00827	2.52943	5.27426		NCI.H209	SCLC	Tumor	6.70321	5.42156			NCI.H209	SCLC	Tumor	6.70321	5.42156			LN.428	GBM	Tumor	6.21023	4.40531
SNB75	GBM	Tumor	0.265967		SNB75	GBM	Tumor	2.00827		SNB75	GBM	Tumor	2.52943		LN.428	GBM	Tumor	4.40531								SBC.5	SCLC	Tumor	6.22766	4.22574			SBC.5	SCLC	Tumor	6.22766	4.22574			SF.172	GBM	Tumor	5.17073	3.06005
															SF.172	GBM	Tumor	3.06005		Cor	AKT Protein	AKT pT308	AKT pS473			NCI.H196	SCLC	Tumor	7.88148	5.01302			NCI.H196	SCLC	Tumor	7.88148	5.01302			U343	GBM	Tumor	6.40139	5.00988
															U343	GBM	Tumor	5.00988		PAK1	0.272478	-0.0285924	-0.106442			NCI.H889	SCLC	Tumor	6.7862	5.05224			NCI.H889	SCLC	Tumor	6.7862	5.05224			LN.215	GBM	Tumor	6.46728	5.81019
															LN.215	GBM	Tumor	5.81019								NCI.H211	SCLC	Tumor	5.50779	6.05028			NCI.H211	SCLC	Tumor	5.50779	6.05028			LN.464	GBM	Tumor	6.79403	5.03562
															LN.464	GBM	Tumor	5.03562								NCI.H2171	SCLC	Tumor	5.91217	5.95513			NCI.H2171	SCLC	Tumor	5.91217	5.95513			U.178	GBM	Tumor	6.94474	4.0798
															U.178	GBM	Tumor	4.0798								NCI.H146	SCLC	Tumor	7.74039	4.67186			NCI.H146	SCLC	Tumor	7.74039	4.67186			A1207	GBM	Tumor	6.40888	5.57319
															A1207	GBM	Tumor	5.57319								DMS.79	SCLC	Tumor	8.16305	6.81224			DMS.79	SCLC	Tumor	8.16305	6.81224			LN.319	GBM	Tumor	6.46597	3.89045
															LN.319	GBM	Tumor	3.89045								NCI.H526	SCLC	Tumor	6.91313	5.38267			NCI.H526	SCLC	Tumor	6.91313	5.38267			LN382	GBM	Tumor	7.00551	4.30305
															LN382	GBM	Tumor	4.30305								NCI.H2196	SCLC	Tumor	5.64875	6.47849			NCI.H2196	SCLC	Tumor	5.64875	6.47849			LN.340	GBM	Tumor	6.53761	5.50112
															LN.340	GBM	Tumor	5.50112								NCI.H446	SCLC	Tumor	6.89385	6.99175			NCI.H446	SCLC	Tumor	6.89385	6.99175			SF268	GBM	Tumor	8.43833	4.91791
															SF268	GBM	Tumor	4.91791								SCLC.21H	SCLC	Tumor	6.51869	5.20516			SCLC.21H	SCLC	Tumor	6.51869	5.20516			SNB75	GBM	Tumor	7.5697	5.27426
															SNB75	GBM	Tumor	5.27426								SHP.77	SCLC	Tumor	6.52199	3.82985			SHP.77	SCLC	Tumor	6.52199	3.82985
																										NCI.H841	SCLC	Tumor	6.32912	5.93334			NCI.H841	SCLC	Tumor	6.32912	5.93334
																										SW1116	COAD_READ	Tumor	5.52419	5.17473			SW1116	COAD_READ	Tumor	5.52419	5.17473
																										OUMS.23	COAD_READ	Tumor	5.77321	5.71699			OUMS.23	COAD_READ	Tumor	5.77321	5.71699
																										NCI.H716	COAD_READ	Tumor	8.48398	4.60703			NCI.H716	COAD_READ	Tumor	8.48398	4.60703
																										SW480	COAD_READ	Tumor	5.83693	1.34483			SW480	COAD_READ	Tumor	5.83693	1.34483
																										SNU.C2A	COAD_READ	Tumor	7.43904	5.41515			SNU.C2A	COAD_READ	Tumor	7.43904	5.41515
																										NCI.H508	COAD_READ	Tumor	5.35014	5.31578			NCI.H508	COAD_READ	Tumor	5.35014	5.31578
																										LS123	COAD_READ	Tumor	6.18488	2.90497			LS123	COAD_READ	Tumor	6.18488	2.90497
																										SNU.1197	COAD_READ	Tumor	6.10852	4.4019			SNU.1197	COAD_READ	Tumor	6.10852	4.4019
																										CW.2	COAD_READ	Tumor	6.82094	5.41549			CW.2	COAD_READ	Tumor	6.82094	5.41549
																										SNU.61	COAD_READ	Tumor	6.98277	5.92434			SNU.61	COAD_READ	Tumor	6.98277	5.92434
																										HCC.1588	COAD_READ	Tumor	6.05181	5.24945			HCC.1588	COAD_READ	Tumor	6.05181	5.24945
																										HT115	COAD_READ	Tumor	5.9855	5.29682			HT115	COAD_READ	Tumor	5.9855	5.29682
																										SNU.1033	COAD_READ	Tumor	5.55643	4.47897			SNU.1033	COAD_READ	Tumor	5.55643	4.47897
																										SNU.C5	COAD_READ	Tumor	6.39163	5.23458			SNU.C5	COAD_READ	Tumor	6.39163	5.23458
																										SNU.C4	COAD_READ	Tumor	6.88655	6.15117			SNU.C4	COAD_READ	Tumor	6.88655	6.15117
																										HCT.15	COAD_READ	Tumor	6.7086	5.0027			HCT.15	COAD_READ	Tumor	6.7086	5.0027
																										SW1463	COAD_READ	Tumor	6.22574	5.53512			SW1463	COAD_READ	Tumor	6.22574	5.53512
																										CCK.81	COAD_READ	Tumor	6.80038	5.34908			CCK.81	COAD_READ	Tumor	6.80038	5.34908
																										COLO.201	COAD_READ	Tumor	6.48848	6.10224			COLO.201	COAD_READ	Tumor	6.48848	6.10224
																										C2BBe1	COAD_READ	Tumor	6.17532	6.05658			C2BBe1	COAD_READ	Tumor	6.17532	6.05658
																										LS513	COAD_READ	Tumor	6.34997	5.26416			LS513	COAD_READ	Tumor	6.34997	5.26416
																										SW837	COAD_READ	Tumor	6.85997	5.51475			SW837	COAD_READ	Tumor	6.85997	5.51475
																										GP2d	COAD_READ	Tumor	7.08661	6.2502			GP2d	COAD_READ	Tumor	7.08661	6.2502
																										HT55	COAD_READ	Tumor	5.16148	5.71946			HT55	COAD_READ	Tumor	5.16148	5.71946
																										MDST8	COAD_READ	Tumor	7.59141	6.59365			MDST8	COAD_READ	Tumor	7.59141	6.59365
																										SK.CO.1	COAD_READ	Tumor	7.32355	5.88631			SK.CO.1	COAD_READ	Tumor	7.32355	5.88631
																										SNU.81	COAD_READ	Tumor	6.66363	5.94509			SNU.81	COAD_READ	Tumor	6.66363	5.94509
																										SNU.1040	COAD_READ	Tumor	6.47411	4.19613			SNU.1040	COAD_READ	Tumor	6.47411	4.19613
																										SNU.175	COAD_READ	Tumor	7.22226	4.4489			SNU.175	COAD_READ	Tumor	7.22226	4.4489
																										SNU.407	COAD_READ	Tumor	6.49137	5.34979			SNU.407	COAD_READ	Tumor	6.49137	5.34979
																										SNU.283	COAD_READ	Tumor	6.5435	5.22265			SNU.283	COAD_READ	Tumor	6.5435	5.22265
																										SNU.503	COAD_READ	Tumor	6.67186	6.43296			SNU.503	COAD_READ	Tumor	6.67186	6.43296
																										Hs.675.T	COAD_READ	Tumor	7.02603	4.10434			Hs.675.T	COAD_READ	Tumor	7.02603	4.10434
																										HCC.56	COAD_READ	Tumor	6.2426	4.98596			HCC.56	COAD_READ	Tumor	6.2426	4.98596
																										RCM.1	COAD_READ	Tumor	6.09908	5.01257			RCM.1	COAD_READ	Tumor	6.09908	5.01257
																										RKO	COAD_READ	Tumor	6.32499	5.30086			RKO	COAD_READ	Tumor	6.32499	5.30086
																										SNU.C1	COAD_READ	Tumor	6.59485	5.42459			SNU.C1	COAD_READ	Tumor	6.59485	5.42459
																										SW620	COAD_READ	Tumor	6.94427	5.0321			SW620	COAD_READ	Tumor	6.94427	5.0321
																										HCT.116	COAD_READ	Tumor	6.74106	5.488			HCT.116	COAD_READ	Tumor	6.74106	5.488
																										LS411N	COAD_READ	Tumor	6.23228	5.58556			LS411N	COAD_READ	Tumor	6.23228	5.58556
																										LoVo	COAD_READ	Tumor	6.49586	5.49346			LoVo	COAD_READ	Tumor	6.49586	5.49346
																										LS1034	COAD_READ	Tumor	6.46074	5.78607			LS1034	COAD_READ	Tumor	6.46074	5.78607
																										SW48	COAD_READ	Tumor	6.6499	5.39369			SW48	COAD_READ	Tumor	6.6499	5.39369
																										LS.180	COAD_READ	Tumor	6.87934	6.08428			LS.180	COAD_READ	Tumor	6.87934	6.08428
																										SW403	COAD_READ	Tumor	6.09276	6.5016			SW403	COAD_READ	Tumor	6.09276	6.5016
																										NCI.H747	COAD_READ	Tumor	5.80064	4.23573			NCI.H747	COAD_READ	Tumor	5.80064	4.23573
																										SW1417	COAD_READ	Tumor	6.68902	3.52482			SW1417	COAD_READ	Tumor	6.68902	3.52482
																										SW948	COAD_READ	Tumor	6.2213	6.65878			SW948	COAD_READ	Tumor	6.2213	6.65878
																										HT.29	COAD_READ	Tumor	6.31397	6.14384			HT.29	COAD_READ	Tumor	6.31397	6.14384
																										KM12	COAD_READ	Tumor	5.72574	5.49121			KM12	COAD_READ	Tumor	5.72574	5.49121
																										T84	COAD_READ	Tumor	6.49969	5.75756			T84	COAD_READ	Tumor	6.49969	5.75756
																										CL.14	COAD_READ	Tumor	6.10957	5.92671			CL.14	COAD_READ	Tumor	6.10957	5.92671
																										CL.40	COAD_READ	Tumor	6.00473	5.4522			CL.40	COAD_READ	Tumor	6.00473	5.4522
																										Hs.698.T	COAD_READ	Tumor	6.69404	4.69599			Hs.698.T	COAD_READ	Tumor	6.69404	4.69599
																										COLO.678	COAD_READ	Tumor	7.07884	4.78712			COLO.678	COAD_READ	Tumor	7.07884	4.78712
																										COLO.320	COAD_READ	Tumor	6.23151	4.5435			COLO.320	COAD_READ	Tumor	6.23151	4.5435
																										CL.11	COAD_READ	Tumor	6.9424	5.76102			CL.11	COAD_READ	Tumor	6.9424	5.76102
																										CL.34	COAD_READ	Tumor	6.48784	6.21257			CL.34	COAD_READ	Tumor	6.48784	6.21257
																										NA.	COAD_READ	Tumor	5.97177	5.67214			NA.	COAD_READ	Tumor	5.97177	5.67214
																										P3HR.1	DLBC	Tumor	6.17133	0.613532			P3HR.1	DLBC	Tumor	6.17133	0.613532
																										Toledo	DLBC	Tumor	6.87344	5.26379			Toledo	DLBC	Tumor	6.87344	5.26379
																										Raji	DLBC	Tumor	6.34394	4.86641			Raji	DLBC	Tumor	6.34394	4.86641
																										BL.41	DLBC	Tumor	5.72601	4.31325			BL.41	DLBC	Tumor	5.72601	4.31325
																										A4.Fuk	DLBC	Tumor	5.70681	6.28485			A4.Fuk	DLBC	Tumor	5.70681	6.28485
																										A3.KAW	DLBC	Tumor	7.01033	5.65907			A3.KAW	DLBC	Tumor	7.01033	5.65907
																										MC116	DLBC	Tumor	5.85947	3.64501			MC116	DLBC	Tumor	5.85947	3.64501
																										CA46	DLBC	Tumor	5.12598	2.40599			CA46	DLBC	Tumor	5.12598	2.40599
																										BCP.1	DLBC	Tumor	6.6565	4.02857			BCP.1	DLBC	Tumor	6.6565	4.02857
																										DB	DLBC	Tumor	6.23649	6.66931			DB	DLBC	Tumor	6.23649	6.66931
																										GA.10	DLBC	Tumor	5.60348	3.27352			GA.10	DLBC	Tumor	5.60348	3.27352
																										EB1	DLBC	Tumor	5.77004	5.13996			EB1	DLBC	Tumor	5.77004	5.13996
																										Daudi	DLBC	Tumor	6.07639	4.60051			Daudi	DLBC	Tumor	6.07639	4.60051
																										HT	DLBC	Tumor	6.41785	4.40871			HT	DLBC	Tumor	6.41785	4.40871
																										JM1	DLBC	Tumor	6.26866	1.94111			JM1	DLBC	Tumor	6.26866	1.94111
																										NAMALWA	DLBC	Tumor	6.65363	5.03782			NAMALWA	DLBC	Tumor	6.65363	5.03782
																										SU.DHL.8	DLBC	Tumor	6.40531	2.5435			SU.DHL.8	DLBC	Tumor	6.40531	2.5435
																										OCI.LY3	DLBC	Tumor	6.47216	5.72819			OCI.LY3	DLBC	Tumor	6.47216	5.72819
																										BL.70	DLBC	Tumor	5.64155	3.853			BL.70	DLBC	Tumor	5.64155	3.853
																										CI.1	DLBC	Tumor	6.59857	5.18468			CI.1	DLBC	Tumor	6.59857	5.18468
																										U.937	DLBC	Tumor	6.40361	5.05398			U.937	DLBC	Tumor	6.40361	5.05398
																										ST486	DLBC	Tumor	6.81596	3.71699			ST486	DLBC	Tumor	6.81596	3.71699
																										RL	DLBC	Tumor	6.46254	5.00495			RL	DLBC	Tumor	6.46254	5.00495
																										GRANTA.519	DLBC	Tumor	7.01647	3.52231			GRANTA.519	DLBC	Tumor	7.01647	3.52231
																										JeKo.1	DLBC	Tumor	7.16802	0.536053			JeKo.1	DLBC	Tumor	7.16802	0.536053
																										NU.DHL.1	DLBC	Tumor	6.01569	4.50716			NU.DHL.1	DLBC	Tumor	6.01569	4.50716
																										SU.DHL.10	DLBC	Tumor	6.03496	0.321928			SU.DHL.10	DLBC	Tumor	6.03496	0.321928
																										SU.DHL.4	DLBC	Tumor	5.77479	1.80323			SU.DHL.4	DLBC	Tumor	5.77479	1.80323
																										OCI.LY.19	DLBC	Tumor	6.38198	3.90014			OCI.LY.19	DLBC	Tumor	6.38198	3.90014
																										Mino	DLBC	Tumor	6.74792	3.71149			Mino	DLBC	Tumor	6.74792	3.71149
																										DOHH.2	DLBC	Tumor	6.11187	3.91265			DOHH.2	DLBC	Tumor	6.11187	3.91265
																										RI.1	DLBC	Tumor	7.12102	4.96162			RI.1	DLBC	Tumor	7.12102	4.96162
																										KARPAS.422	DLBC	Tumor	7.21568	4.46989			KARPAS.422	DLBC	Tumor	7.21568	4.46989
																										Pfeiffer	DLBC	Tumor	6.011	4.24031			Pfeiffer	DLBC	Tumor	6.011	4.24031
																										NU.DUL.1	DLBC	Tumor	6.4224	4.15299			NU.DUL.1	DLBC	Tumor	6.4224	4.15299
																										SU.DHL.6	DLBC	Tumor	5.62117	3.65764			SU.DHL.6	DLBC	Tumor	5.62117	3.65764
																										REC.1	DLBC	Tumor	5.97062	4.64443			REC.1	DLBC	Tumor	5.97062	4.64443
																										SU.DHL.5	DLBC	Tumor	6.24736	4.86295			SU.DHL.5	DLBC	Tumor	6.24736	4.86295
																										WSU.DLCL2	DLBC	Tumor	5.57107	0.687061			WSU.DLCL2	DLBC	Tumor	5.57107	0.687061
																										UM.UC.3	BLCA	Tumor	6.73904	6.81992			UM.UC.3	BLCA	Tumor	6.73904	6.81992
																										X5637	BLCA	Tumor	7.18636	5.82426			X5637	BLCA	Tumor	7.18636	5.82426
																										U.BLC1	BLCA	Tumor	5.615	4.08746			U.BLC1	BLCA	Tumor	5.615	4.08746
																										J82	BLCA	Tumor	7.21907	5.38405			J82	BLCA	Tumor	7.21907	5.38405
																										KMBC.2	BLCA	Tumor	7.14088	5.57592			KMBC.2	BLCA	Tumor	7.14088	5.57592
																										T24	BLCA	Tumor	7.75876	5.47735			T24	BLCA	Tumor	7.75876	5.47735
																										X253J	BLCA	Tumor	5.53699	3.05485			X253J	BLCA	Tumor	5.53699	3.05485
																										X253J.BV	BLCA	Tumor	6.14343	3.45154			X253J.BV	BLCA	Tumor	6.14343	3.45154
																										HT.1197	BLCA	Tumor	6.57682	4.53045			HT.1197	BLCA	Tumor	6.57682	4.53045
																										UM.UC.1	BLCA	Tumor	6.08704	3.60526			UM.UC.1	BLCA	Tumor	6.08704	3.60526
																										TCCSUP	BLCA	Tumor	6.76102	4.96255			TCCSUP	BLCA	Tumor	6.76102	4.96255
																										JMSU.1	BLCA	Tumor	7.27789	5.44162			JMSU.1	BLCA	Tumor	7.27789	5.44162
																										SW.780	BLCA	Tumor	6.77413	3.38543			SW.780	BLCA	Tumor	6.77413	3.38543
																										HT.1376	BLCA	Tumor	6.25682	0.978196			HT.1376	BLCA	Tumor	6.25682	0.978196
																										SCaBER	BLCA	Tumor	5.73688	5.30268			SCaBER	BLCA	Tumor	5.73688	5.30268
																										RT4	BLCA	Tumor	7.39738	5.28059			RT4	BLCA	Tumor	7.39738	5.28059
																										RT.112	BLCA	Tumor	7.03804	2.51349			RT.112	BLCA	Tumor	7.03804	2.51349
																										SW.1710	BLCA	Tumor	5.76235	5.01926			SW.1710	BLCA	Tumor	5.76235	5.01926
																										VM.CUB1	BLCA	Tumor	6.11832	3.92884			VM.CUB1	BLCA	Tumor	6.11832	3.92884
																										CAL.29	BLCA	Tumor	6.79961	3.79909			CAL.29	BLCA	Tumor	6.79961	3.79909
																										BFTC.905	BLCA	Tumor	7.40395	4.57168			BFTC.905	BLCA	Tumor	7.40395	4.57168
																										KU.19.19	BLCA	Tumor	6.66846	4.40939			KU.19.19	BLCA	Tumor	6.66846	4.40939
																										BC.3C	BLCA	Tumor	7.19091	4.05658			BC.3C	BLCA	Tumor	7.19091	4.05658
																										X639.V	BLCA	Tumor	7.3249	5.32841			X639.V	BLCA	Tumor	7.3249	5.32841
																										X647.V	BLCA	Tumor	6.91433	4.49953			X647.V	BLCA	Tumor	6.91433	4.49953
																										HOS	SARC	Tumor	6.94638	4.76447			HOS	SARC	Tumor	6.94638	4.76447
																										TC.71	SARC	Tumor	6.67553	4.58676			TC.71	SARC	Tumor	6.67553	4.58676
																										RKN	SARC	Tumor	7.50104	5.15178			RKN	SARC	Tumor	7.50104	5.15178
																										HT.1080	SARC	Tumor	6.80697	5.43696			HT.1080	SARC	Tumor	6.80697	5.43696
																										SK.UT.1	SARC	Tumor	7.34296	5.74631			SK.UT.1	SARC	Tumor	7.34296	5.74631
																										T1.73	SARC	Tumor	6.70584	4.86295			T1.73	SARC	Tumor	6.70584	4.86295
																										Hs.870.T	SARC	Tumor	7.36265	4.7761			Hs.870.T	SARC	Tumor	7.36265	4.7761
																										SJSA.1	SARC	Tumor	7.29664	4.11603			SJSA.1	SARC	Tumor	7.29664	4.11603
																										A.204	SARC	Tumor	6.86047	4.56499			A.204	SARC	Tumor	6.86047	4.56499
																										A.673	SARC	Tumor	6.58241	4.75809			A.673	SARC	Tumor	6.58241	4.75809
																										SK.N.MC	SARC	Tumor	6.03056	5.39575			SK.N.MC	SARC	Tumor	6.03056	5.39575
																										RD.ES	SARC	Tumor	6.20926	6.50383			RD.ES	SARC	Tumor	6.20926	6.50383
																										MES.SA	SARC	Tumor	6.6737	4.89627			MES.SA	SARC	Tumor	6.6737	4.89627
																										GCT	SARC	Tumor	6.37173	5.47573			GCT	SARC	Tumor	6.37173	5.47573
																										U.2.OS	SARC	Tumor	6.38871	6.0237			U.2.OS	SARC	Tumor	6.38871	6.0237
																										G.401	SARC	Tumor	6.72697	5.19928			G.401	SARC	Tumor	6.72697	5.19928
																										Saos.2	SARC	Tumor	7.20114	5.49985			Saos.2	SARC	Tumor	7.20114	5.49985
																										SK.ES.1	SARC	Tumor	5.85425	5.4002			SK.ES.1	SARC	Tumor	5.85425	5.4002
																										RH.30	SARC	Tumor	7.68881	5.80064			RH.30	SARC	Tumor	7.68881	5.80064
																										KYM.1	SARC	Tumor	7.14078	4.67186			KYM.1	SARC	Tumor	7.14078	4.67186
																										Hs.819.T	SARC	Tumor	6.6175	4.37712			Hs.819.T	SARC	Tumor	6.6175	4.37712
																										MG.63	SARC	Tumor	6.38405	4.95745			MG.63	SARC	Tumor	6.38405	4.95745
																										TE.617.T	SARC	Tumor	6.38232	4.8268			TE.617.T	SARC	Tumor	6.38232	4.8268
																										G.292..clone.A141B1	SARC	Tumor	7.48043	5.71012			G.292..clone.A141B1	SARC	Tumor	7.48043	5.71012
																										Hs.729	SARC	Tumor	7.39797	4.83491			Hs.729	SARC	Tumor	7.39797	4.83491
																										SW.1353	SARC	Tumor	6.7148	5.76527			SW.1353	SARC	Tumor	6.7148	5.76527
																										G.402	SARC	Tumor	6.08044	4.25927			G.402	SARC	Tumor	6.08044	4.25927
																										RD	SARC	Tumor	7.28059	6.04155			RD	SARC	Tumor	7.28059	6.04155
																										TE.125.T	SARC	Tumor	6.73782	4.52356			TE.125.T	SARC	Tumor	6.73782	4.52356
																										RH.41	SARC	Tumor	7.25993	2.33628			RH.41	SARC	Tumor	7.25993	2.33628
																										CAL.78	SARC	Tumor	7.08799	4.71754			CAL.78	SARC	Tumor	7.08799	4.71754
																										TE.441.T	SARC	Tumor	7.16078	1.63691			TE.441.T	SARC	Tumor	7.16078	1.63691
																										Hs.863.T	SARC	Tumor	7.2183	5.1981			Hs.863.T	SARC	Tumor	7.2183	5.1981
																										MHH.ES.1	SARC	Tumor	5.61235	5.70764			MHH.ES.1	SARC	Tumor	5.61235	5.70764
																										CADO.ES1	SARC	Tumor	6.40139	3.82375			CADO.ES1	SARC	Tumor	6.40139	3.82375
																										S.117	SARC	Tumor	7.1914	3.98185			S.117	SARC	Tumor	7.1914	3.98185
																										RH.18	SARC	Tumor	7.09951	4.79494			RH.18	SARC	Tumor	7.09951	4.79494
																										HuNS1	MM	Tumor	6.33825	6.49394			HuNS1	MM	Tumor	6.33825	6.49394
																										KMS.18	MM	Tumor	4.74362	4.38405			KMS.18	MM	Tumor	4.74362	4.38405
																										KMS.21BM	MM	Tumor	5.50589	3.41954			KMS.21BM	MM	Tumor	5.50589	3.41954
																										KMS.26	MM	Tumor	5.55735	0.765535			KMS.26	MM	Tumor	5.55735	0.765535
																										KMS.27	MM	Tumor	5.43596	2.89336			KMS.27	MM	Tumor	5.43596	2.89336
																										KMS.28BM	MM	Tumor	6.20496	5.26866			KMS.28BM	MM	Tumor	6.20496	5.26866
																										KMS.34	MM	Tumor	4.86295	5.00854			KMS.34	MM	Tumor	4.86295	5.00854
																										KHM.1B	MM	Tumor	5.48414	6.65592			KHM.1B	MM	Tumor	5.48414	6.65592
																										KMS.11	MM	Tumor	5.9472	4.48864			KMS.11	MM	Tumor	5.9472	4.48864
																										KE.97	MM	Tumor	6.20887	5.04264			KE.97	MM	Tumor	6.20887	5.04264
																										U266B1	MM	Tumor	5.43363	6.37903			U266B1	MM	Tumor	5.43363	6.37903
																										KMM.1	MM	Tumor	6.6011	4.51665			KMM.1	MM	Tumor	6.6011	4.51665
																										KMS.20	MM	Tumor	6.71081	5.1643			KMS.20	MM	Tumor	6.71081	5.1643
																										NCI.H929	MM	Tumor	5.38094	3.91169			NCI.H929	MM	Tumor	5.38094	3.91169
																										KMS.12.BM	MM	Tumor	6.36929	4.25852			KMS.12.BM	MM	Tumor	6.36929	4.25852
																										MM1.S	MM	Tumor	5.57713	5.29278			MM1.S	MM	Tumor	5.57713	5.29278
																										RPMI.8226	MM	Tumor	5.52576	0.782409			RPMI.8226	MM	Tumor	5.52576	0.782409
																										MOLP.2	MM	Tumor	6.23439	3.76447			MOLP.2	MM	Tumor	6.23439	3.76447
																										JJN.3	MM	Tumor	5.67158	4.76022			JJN.3	MM	Tumor	5.67158	4.76022
																										SK.MM.2	MM	Tumor	5.99232	4.34341			SK.MM.2	MM	Tumor	5.99232	4.34341
																										LP.1	MM	Tumor	6.06437	6.54365			LP.1	MM	Tumor	6.06437	6.54365
																										OPM.2	MM	Tumor	6.77755	6.53854			OPM.2	MM	Tumor	6.77755	6.53854
																										L.363	MM	Tumor	5.3466	2.07724			L.363	MM	Tumor	5.3466	2.07724
																										KARPAS.620	MM	Tumor	5.32445	7.66463			KARPAS.620	MM	Tumor	5.32445	7.66463
																										EJM	MM	Tumor	5.17513	1.38405			EJM	MM	Tumor	5.17513	1.38405
																										AMO.1	MM	Tumor	5.23764	4.47897			AMO.1	MM	Tumor	5.23764	4.47897
																										MOLP.8	MM	Tumor	5.98504	4.18982			MOLP.8	MM	Tumor	5.98504	4.18982
																										NA..1	MM	Tumor	6.11562	7.42089			NA..1	MM	Tumor	6.11562	7.42089
																										AML.193	LAML	Tumor	7.12039	6.37382			AML.193	LAML	Tumor	7.12039	6.37382
																										P31.FUJ	LAML	Tumor	6.96371	6.6359			P31.FUJ	LAML	Tumor	6.96371	6.6359
																										HEL	LAML	Tumor	6.25607	4.97177			HEL	LAML	Tumor	6.25607	4.97177
																										KO52	LAML	Tumor	6.41903	5.83415			KO52	LAML	Tumor	6.41903	5.83415
																										HEL.92.1.7	LAML	Tumor	5.93357	5.34767			HEL.92.1.7	LAML	Tumor	5.93357	5.34767
																										THP.1	LAML	Tumor	7.13319	5.55888			THP.1	LAML	Tumor	7.13319	5.55888
																										GDM.1	LAML	Tumor	6.52826	6.51144			GDM.1	LAML	Tumor	6.52826	6.51144
																										KASUMI.1	LAML	Tumor	5.71699	5.69014			KASUMI.1	LAML	Tumor	5.71699	5.69014
																										CMK	LAML	Tumor	6.47298	4.66107			CMK	LAML	Tumor	6.47298	4.66107
																										SKM.1	LAML	Tumor	6.75889	6.52027			SKM.1	LAML	Tumor	6.75889	6.52027
																										KG.1	LAML	Tumor	6.62249	6.58841			KG.1	LAML	Tumor	6.62249	6.58841
																										HL.60	LAML	Tumor	5.93074	4.02326			HL.60	LAML	Tumor	5.93074	4.02326
																										MV.4.11	LAML	Tumor	6.65191	5.41143			MV.4.11	LAML	Tumor	6.65191	5.41143
																										MOLM.13	LAML	Tumor	5.66334	5.20633			MOLM.13	LAML	Tumor	5.66334	5.20633
																										MONO.MAC.6	LAML	Tumor	7.17193	4.95745			MONO.MAC.6	LAML	Tumor	7.17193	4.95745
																										TF.1	LAML	Tumor	6.93628	5.45352			TF.1	LAML	Tumor	6.93628	5.45352
																										ME.1	LAML	Tumor	6.35632	3.55582			ME.1	LAML	Tumor	6.35632	3.55582
																										OCI.AML3	LAML	Tumor	6.78947	4.56864			OCI.AML3	LAML	Tumor	6.78947	4.56864
																										Kasumi.6	LAML	Tumor	6.78869	5.45385			Kasumi.6	LAML	Tumor	6.78869	5.45385
																										EOL.1	LAML	Tumor	6.50112	5.73254			EOL.1	LAML	Tumor	6.50112	5.73254
																										MONO.MAC.1	LAML	Tumor	6.13217	5.04963			MONO.MAC.1	LAML	Tumor	6.13217	5.04963
																										PL.21	LAML	Tumor	6.07639	4.37573			PL.21	LAML	Tumor	6.07639	4.37573
																										OCI.AML2	LAML	Tumor	6.13278	6.22786			OCI.AML2	LAML	Tumor	6.13278	6.22786
																										OCI.AML5	LAML	Tumor	6.40956	5.25134			OCI.AML5	LAML	Tumor	6.40956	5.25134
																										NOMO.1	LAML	Tumor	6.28263	7.09635			NOMO.1	LAML	Tumor	6.28263	7.09635
																										M.07e	LAML	Tumor	6.42626	4.07724			M.07e	LAML	Tumor	6.42626	4.07724
																										NB.4	LAML	Tumor	6.40905	4.75168			NB.4	LAML	Tumor	6.40905	4.75168
																										OCI.M1	LAML	Tumor	4.98959	4.73769			OCI.M1	LAML	Tumor	4.98959	4.73769
																										SIG.M5	LAML	Tumor	6.09022	5.51065			SIG.M5	LAML	Tumor	6.09022	5.51065
																										MOLM.16	LAML	Tumor	6.63749	3.81044			MOLM.16	LAML	Tumor	6.63749	3.81044
																										F.36P	LAML	Tumor	6.33593	4.22651			F.36P	LAML	Tumor	6.33593	4.22651
																										NA..2	LAML	Tumor	6.01992	5.43263			NA..2	LAML	Tumor	6.01992	5.43263
																										PLB.985	LAML	Tumor	5.30012	4.78136			PLB.985	LAML	Tumor	5.30012	4.78136
																										SKNO.1	LAML	Tumor	6.74416	5.7952			SKNO.1	LAML	Tumor	6.74416	5.7952
																										MUTZ.3	LAML	Tumor	6.52779	6.17453			MUTZ.3	LAML	Tumor	6.52779	6.17453
																										RVH.421	SKCM	Tumor	6.93251	5.96162			RVH.421	SKCM	Tumor	6.93251	5.96162
																										Hs.895.T	SKCM	Tumor	7.16259	4.70266			Hs.895.T	SKCM	Tumor	7.16259	4.70266
																										Hs.940.T	SKCM	Tumor	6.87271	4.22188			Hs.940.T	SKCM	Tumor	6.87271	4.22188
																										SK.MEL.1	SKCM	Tumor	5.72274	5.57894			SK.MEL.1	SKCM	Tumor	5.72274	5.57894
																										Hs.936.T	SKCM	Tumor	7.25833	4.89142			Hs.936.T	SKCM	Tumor	7.25833	4.89142
																										SK.MEL.28	SKCM	Tumor	6.13689	4.07724			SK.MEL.28	SKCM	Tumor	6.13689	4.07724
																										SH.4	SKCM	Tumor	6.69488	4.65421			SH.4	SKCM	Tumor	6.69488	4.65421
																										CJM	SKCM	Tumor	7.02248	5.03122			CJM	SKCM	Tumor	7.02248	5.03122
																										WM.115	SKCM	Tumor	7.06253	6.1643			WM.115	SKCM	Tumor	7.06253	6.1643
																										COLO.800	SKCM	Tumor	6.95548	4.56682			COLO.800	SKCM	Tumor	6.95548	4.56682
																										UACC.62	SKCM	Tumor	6.916	5.33414			UACC.62	SKCM	Tumor	6.916	5.33414
																										RPMI.7951	SKCM	Tumor	6.33664	5.14119			RPMI.7951	SKCM	Tumor	6.33664	5.14119
																										COLO.783	SKCM	Tumor	7.92208	5.58466			COLO.783	SKCM	Tumor	7.92208	5.58466
																										COLO.792	SKCM	Tumor	6.86654	4.1102			COLO.792	SKCM	Tumor	6.86654	4.1102
																										WM.983B	SKCM	Tumor	6.58676	4.69265			WM.983B	SKCM	Tumor	6.58676	4.69265
																										WM.793	SKCM	Tumor	7.2385	5.77189			WM.793	SKCM	Tumor	7.2385	5.77189
																										MDA.MB.435S	SKCM	Tumor	6.74349	5.16511			MDA.MB.435S	SKCM	Tumor	6.74349	5.16511
																										WM1799	SKCM	Tumor	7.07371	5.35509			WM1799	SKCM	Tumor	7.07371	5.35509
																										MeWo	SKCM	Tumor	7.74725	6.17692			MeWo	SKCM	Tumor	7.74725	6.17692
																										WM.88	SKCM	Tumor	6.89154	4.55766			WM.88	SKCM	Tumor	6.89154	4.55766
																										IGR.1	SKCM	Tumor	6.59395	2.17313			IGR.1	SKCM	Tumor	6.59395	2.17313
																										A2058	SKCM	Tumor	6.75782	5.23343			A2058	SKCM	Tumor	6.75782	5.23343
																										IGR.39	SKCM	Tumor	6.71781	5.38267			IGR.39	SKCM	Tumor	6.71781	5.38267
																										HT.144	SKCM	Tumor	7.0706	4.92505			HT.144	SKCM	Tumor	7.0706	4.92505
																										SK.MEL.31	SKCM	Tumor	6.49777	5.11811			SK.MEL.31	SKCM	Tumor	6.49777	5.11811
																										Hs.839.T	SKCM	Tumor	7.24973	5.32229			Hs.839.T	SKCM	Tumor	7.24973	5.32229
																										Hs.939.T	SKCM	Tumor	7.84511	5.1819			Hs.939.T	SKCM	Tumor	7.84511	5.1819
																										Hs.688.A..T	SKCM	Tumor	7.13031	4.82985			Hs.688.A..T	SKCM	Tumor	7.13031	4.82985
																										A101D	SKCM	Tumor	6.5292	5.07852			A101D	SKCM	Tumor	6.5292	5.07852
																										COLO.829	SKCM	Tumor	6.76235	4.36177			COLO.829	SKCM	Tumor	6.76235	4.36177
																										IPC.298	SKCM	Tumor	6.83971	5.01614			IPC.298	SKCM	Tumor	6.83971	5.01614
																										SK.MEL.24	SKCM	Tumor	6.90014	4.69599			SK.MEL.24	SKCM	Tumor	6.90014	4.69599
																										K029AX	SKCM	Tumor	6.09064	5.05572			K029AX	SKCM	Tumor	6.09064	5.05572
																										Hs.695T	SKCM	Tumor	6.75128	3.75596			Hs.695T	SKCM	Tumor	6.75128	3.75596
																										SK.MEL.3	SKCM	Tumor	7.40148	4.96486			SK.MEL.3	SKCM	Tumor	7.40148	4.96486
																										HMCB	SKCM	Tumor	6.36265	4.70155			HMCB	SKCM	Tumor	6.36265	4.70155
																										Malme.3M	SKCM	Tumor	7.28161	4.20945			Malme.3M	SKCM	Tumor	7.28161	4.20945
																										MEL.JUSO	SKCM	Tumor	6.65978	4.79129			MEL.JUSO	SKCM	Tumor	6.65978	4.79129
																										COLO.679	SKCM	Tumor	6.79688	5.28059			COLO.679	SKCM	Tumor	6.79688	5.28059
																										MEL.HO	SKCM	Tumor	7.63314	4.1819			MEL.HO	SKCM	Tumor	7.63314	4.1819
																										G.361	SKCM	Tumor	6.45746	5.29499			G.361	SKCM	Tumor	6.45746	5.29499
																										COLO.741	SKCM	Tumor	6.65735	5.14853			COLO.741	SKCM	Tumor	6.65735	5.14853
																										SK.MEL.30	SKCM	Tumor	7.40028	4.45549			SK.MEL.30	SKCM	Tumor	7.40028	4.45549
																										C32	SKCM	Tumor	7.78234	5.09128			C32	SKCM	Tumor	7.78234	5.09128
																										A.375	SKCM	Tumor	6.03936	5.24982			A.375	SKCM	Tumor	6.03936	5.24982
																										Hs.294T	SKCM	Tumor	6.40786	4.71039			Hs.294T	SKCM	Tumor	6.40786	4.71039
																										SK.MEL.5	SKCM	Tumor	6.56773	4.38819			SK.MEL.5	SKCM	Tumor	6.56773	4.38819
																										Hs.944.T	SKCM	Tumor	7.03232	4.64386			Hs.944.T	SKCM	Tumor	7.03232	4.64386
																										WM.266.4	SKCM	Tumor	6.97212	5.35509			WM.266.4	SKCM	Tumor	6.97212	5.35509
																										LOX.IMVI	SKCM	Tumor	6.71548	6.15462			LOX.IMVI	SKCM	Tumor	6.71548	6.15462
																										UACC.257	SKCM	Tumor	7.04023	4.98003			UACC.257	SKCM	Tumor	7.04023	4.98003
																										IGR.37	SKCM	Tumor	6.97659	5.4363			IGR.37	SKCM	Tumor	6.97659	5.4363
																										Hs.852.T	SKCM	Tumor	7.1822	6.83479			Hs.852.T	SKCM	Tumor	7.1822	6.83479
																										Hs.934.T	SKCM	Tumor	7.01714	5.18903			Hs.934.T	SKCM	Tumor	7.01714	5.18903
																										HCC2157	BRCA	Tumor	6.48269	4.61235			HCC2157	BRCA	Tumor	6.48269	4.61235
																										Hs.739.T	BRCA	Tumor	7.06188	4.82579			Hs.739.T	BRCA	Tumor	7.06188	4.82579
																										HCC38	BRCA	Tumor	7.07371	5.46923			HCC38	BRCA	Tumor	7.07371	5.46923
																										DU4475	BRCA	Tumor	7.42114	3.93923			DU4475	BRCA	Tumor	7.42114	3.93923
																										MDA.MB.175.VII	BRCA	Tumor	7.72062	6.14751			MDA.MB.175.VII	BRCA	Tumor	7.72062	6.14751
																										T.47D	BRCA	Tumor	7.62527	5.56894			T.47D	BRCA	Tumor	7.62527	5.56894
																										Hs.742.T	BRCA	Tumor	6.17253	4.10685			Hs.742.T	BRCA	Tumor	6.17253	4.10685
																										KPL.1	BRCA	Tumor	8.65331	3.34625			KPL.1	BRCA	Tumor	8.65331	3.34625
																										MDA.MB.231	BRCA	Tumor	7.08364	4.37434			MDA.MB.231	BRCA	Tumor	7.08364	4.37434
																										HCC2218	BRCA	Tumor	7.70895	1.70929			HCC2218	BRCA	Tumor	7.70895	1.70929
																										HCC1954	BRCA	Tumor	6.83428	5.55704			HCC1954	BRCA	Tumor	6.83428	5.55704
																										CAMA.1	BRCA	Tumor	7.25692	2.80116			CAMA.1	BRCA	Tumor	7.25692	2.80116
																										HMC.1.8	BRCA	Tumor	6.06329	3.89433			HMC.1.8	BRCA	Tumor	6.06329	3.89433
																										AU565	BRCA	Tumor	7.73118	3.49313			AU565	BRCA	Tumor	7.73118	3.49313
																										Hs.578T	BRCA	Tumor	6.91468	5.80323			Hs.578T	BRCA	Tumor	6.91468	5.80323
																										BT.20	BRCA	Tumor	6.80297	5.14405			BT.20	BRCA	Tumor	6.80297	5.14405
																										MDA.MB.361	BRCA	Tumor	7.91379	5.05745			MDA.MB.361	BRCA	Tumor	7.91379	5.05745
																										MDA.MB.436	BRCA	Tumor	6.37295	4.65134			MDA.MB.436	BRCA	Tumor	6.37295	4.65134
																										SK.BR.3	BRCA	Tumor	7.02059	2.59932			SK.BR.3	BRCA	Tumor	7.02059	2.59932
																										HCC1143	BRCA	Tumor	8.02115	5.67892			HCC1143	BRCA	Tumor	8.02115	5.67892
																										HCC1937	BRCA	Tumor	6.59783	4.38681			HCC1937	BRCA	Tumor	6.59783	4.38681
																										HCC1569	BRCA	Tumor	6.83213	5.31759			HCC1569	BRCA	Tumor	6.83213	5.31759
																										HCC1395	BRCA	Tumor	7.40846	4.55275			HCC1395	BRCA	Tumor	7.40846	4.55275
																										HCC1187	BRCA	Tumor	7.65385	4.78241			HCC1187	BRCA	Tumor	7.65385	4.78241
																										ZR.75.1	BRCA	Tumor	8.19874	3.87676			ZR.75.1	BRCA	Tumor	8.19874	3.87676
																										HCC70	BRCA	Tumor	6.92029	4.99458			HCC70	BRCA	Tumor	6.92029	4.99458
																										MCF7	BRCA	Tumor	7.53434	2.40871			MCF7	BRCA	Tumor	7.53434	2.40871
																										HCC202	BRCA	Tumor	7.90809	1.49057			HCC202	BRCA	Tumor	7.90809	1.49057
																										MDA.MB.157	BRCA	Tumor	7.50772	5.06566			MDA.MB.157	BRCA	Tumor	7.50772	5.06566
																										EFM.192A	BRCA	Tumor	8.045	5.32445			EFM.192A	BRCA	Tumor	8.045	5.32445
																										MDA.MB.453	BRCA	Tumor	8.44278	3.97545			MDA.MB.453	BRCA	Tumor	8.44278	3.97545
																										EFM.19	BRCA	Tumor	7.17483	3.40054			EFM.19	BRCA	Tumor	7.17483	3.40054
																										BT.474	BRCA	Tumor	7.84191	3.22188			BT.474	BRCA	Tumor	7.84191	3.22188
																										Hs.606.T	BRCA	Tumor	6.87958	4.9982			Hs.606.T	BRCA	Tumor	6.87958	4.9982
																										MDA.MB.415	BRCA	Tumor	7.06932	3.83289			MDA.MB.415	BRCA	Tumor	7.06932	3.83289
																										MDA.MB.468	BRCA	Tumor	6.86443	4.67638			MDA.MB.468	BRCA	Tumor	6.86443	4.67638
																										BT.549	BRCA	Tumor	6.77241	3.56438			BT.549	BRCA	Tumor	6.77241	3.56438
																										CAL.85.1	BRCA	Tumor	5.53854	4.45352			CAL.85.1	BRCA	Tumor	5.53854	4.45352
																										HMEL	BRCA	Tumor	5.77056	5.45615			HMEL	BRCA	Tumor	5.77056	5.45615
																										HCC1806	BRCA	Tumor	5.54133	5.67299			HCC1806	BRCA	Tumor	5.54133	5.67299
																										UACC.812	BRCA	Tumor	6.48591	2.83188			UACC.812	BRCA	Tumor	6.48591	2.83188
																										CAL.148	BRCA	Tumor	8.0129	2.9486			CAL.148	BRCA	Tumor	8.0129	2.9486
																										MDA.MB.134.VI	BRCA	Tumor	7.60888	8.62863			MDA.MB.134.VI	BRCA	Tumor	7.60888	8.62863
																										HCC1500	BRCA	Tumor	7.36912	7.35429			HCC1500	BRCA	Tumor	7.36912	7.35429
																										HCC1599	BRCA	Tumor	6.23573	4.08916			HCC1599	BRCA	Tumor	6.23573	4.08916
																										UACC.893	BRCA	Tumor	7.23974	5.94603			UACC.893	BRCA	Tumor	7.23974	5.94603
																										HDQ.P1	BRCA	Tumor	5.31433	4.20163			HDQ.P1	BRCA	Tumor	5.31433	4.20163
																										HCC1419	BRCA	Tumor	7.58767	0.871844			HCC1419	BRCA	Tumor	7.58767	0.871844
																										BT.483	BRCA	Tumor	7.16058	4.56499			BT.483	BRCA	Tumor	7.16058	4.56499
																										Hs.281.T	BRCA	Tumor	7.15654	5.64184			Hs.281.T	BRCA	Tumor	7.15654	5.64184
																										HCC1428	BRCA	Tumor	8.00501	5.16189			HCC1428	BRCA	Tumor	8.00501	5.16189
																										Hs.274.T	BRCA	Tumor	7.05788	4.33985			Hs.274.T	BRCA	Tumor	7.05788	4.33985
																										ZR.75.30	BRCA	Tumor	8.00422	3.93734			ZR.75.30	BRCA	Tumor	8.00422	3.93734
																										Hs.343.T	BRCA	Tumor	7.06393	5.66448			Hs.343.T	BRCA	Tumor	7.06393	5.66448
																										CAL.51	BRCA	Tumor	6.26247	4.54597			CAL.51	BRCA	Tumor	6.26247	4.54597
																										CAL.120	BRCA	Tumor	6.06026	4.95373			CAL.120	BRCA	Tumor	6.06026	4.95373
																										JIMT.1	BRCA	Tumor	5.96878	5.16027			JIMT.1	BRCA	Tumor	5.96878	5.16027
																										SNU.449	LIHC	Tumor	6.85225	4.0063			SNU.449	LIHC	Tumor	6.85225	4.0063
																										JHH.7	LIHC	Tumor	6.09614	5.57864			JHH.7	LIHC	Tumor	6.09614	5.57864
																										HuH.6	LIHC	Tumor	5.45483	3.56316			HuH.6	LIHC	Tumor	5.45483	3.56316
																										SNU.761	LIHC	Tumor	8.44485	5.40701			SNU.761	LIHC	Tumor	8.44485	5.40701
																										Li.7	LIHC	Tumor	6.2386	5.06048			Li.7	LIHC	Tumor	6.2386	5.06048
																										HLF	LIHC	Tumor	6.29591	5.21335			HLF	LIHC	Tumor	6.29591	5.21335
																										JHH.4	LIHC	Tumor	6.20144	3.10266			JHH.4	LIHC	Tumor	6.20144	3.10266
																										JHH.1	LIHC	Tumor	6.35913	4.65764			JHH.1	LIHC	Tumor	6.35913	4.65764
																										JHH.5	LIHC	Tumor	5.81198	5.71727			JHH.5	LIHC	Tumor	5.81198	5.71727
																										HuH.7	LIHC	Tumor	5.79753	4.25475			HuH.7	LIHC	Tumor	5.79753	4.25475
																										SNU.182	LIHC	Tumor	7.31016	3.38543			SNU.182	LIHC	Tumor	7.31016	3.38543
																										SNU.398	LIHC	Tumor	7.01848	4.75435			SNU.398	LIHC	Tumor	7.01848	4.75435
																										SNU.423	LIHC	Tumor	6.36142	1.73118			SNU.423	LIHC	Tumor	6.36142	1.73118
																										SNU.387	LIHC	Tumor	7.10863	5.8999			SNU.387	LIHC	Tumor	7.10863	5.8999
																										SNU.475	LIHC	Tumor	7.21762	3.03738			SNU.475	LIHC	Tumor	7.21762	3.03738
																										JHH.6	LIHC	Tumor	7.10873	2.49313			JHH.6	LIHC	Tumor	7.10873	2.49313
																										SK.HEP.1	LIHC	Tumor	6.46728	2.18587			SK.HEP.1	LIHC	Tumor	6.46728	2.18587
																										SNU.886	LIHC	Tumor	6.09529	4.22959			SNU.886	LIHC	Tumor	6.09529	4.22959
																										SNU.878	LIHC	Tumor	5.15785	4.54597			SNU.878	LIHC	Tumor	5.15785	4.54597
																										NCI.H684	LIHC	Tumor	6.98959	6.37156			NCI.H684	LIHC	Tumor	6.98959	6.37156
																										Hep.3B2.1.7	LIHC	Tumor	6.40242	4.08236			Hep.3B2.1.7	LIHC	Tumor	6.40242	4.08236
																										PLC.PRF.5	LIHC	Tumor	6.43696	3.55459			PLC.PRF.5	LIHC	Tumor	6.43696	3.55459
																										Hep.G2	LIHC	Tumor	6.36947	1.08406			Hep.G2	LIHC	Tumor	6.36947	1.08406
																										huH.1	LIHC	Tumor	5.56316	4.85649			huH.1	LIHC	Tumor	5.56316	4.85649
																										JHH.2	LIHC	Tumor	6.26828	5.01926			JHH.2	LIHC	Tumor	6.26828	5.01926
																										NCI.H28	MESO	Tumor	5.71315	3.40599			NCI.H28	MESO	Tumor	5.71315	3.40599
																										MSTO.211H	MESO	Tumor	6.6094	3.92979			MSTO.211H	MESO	Tumor	6.6094	3.92979
																										IST.MES1	MESO	Tumor	7.30415	4.57107			IST.MES1	MESO	Tumor	7.30415	4.57107
																										ACC.MESO.1	MESO	Tumor	5.75702	4.0993			ACC.MESO.1	MESO	Tumor	5.75702	4.0993
																										NCI.H2052	MESO	Tumor	7.05832	6.30634			NCI.H2052	MESO	Tumor	7.05832	6.30634
																										NCI.H2452	MESO	Tumor	5.8953	4.62293			NCI.H2452	MESO	Tumor	5.8953	4.62293
																										MPP.89	MESO	Tumor	7.28522	3.89724			MPP.89	MESO	Tumor	7.28522	3.89724
																										IST.MES2	MESO	Tumor	6.88594	4.42291			IST.MES2	MESO	Tumor	6.88594	4.42291
																										JL.1	MESO	Tumor	6.34554	4.66164			JL.1	MESO	Tumor	6.34554	4.66164
																										OV56	OV	Tumor	5.47444	4.04439			OV56	OV	Tumor	5.47444	4.04439
																										JHOS.4	OV	Tumor	6.39403	5.7658			JHOS.4	OV	Tumor	6.39403	5.7658
																										RMUG.S	OV	Tumor	6.82782	4.765			RMUG.S	OV	Tumor	6.82782	4.765
																										COV318	OV	Tumor	6.37626	3.47897			COV318	OV	Tumor	6.37626	3.47897
																										JHOM.1	OV	Tumor	7.08172	5.72465			JHOM.1	OV	Tumor	7.08172	5.72465
																										JHOC.5	OV	Tumor	6.63822	5.37608			JHOC.5	OV	Tumor	6.63822	5.37608
																										OVK18	OV	Tumor	7.49889	5.46009			OVK18	OV	Tumor	7.49889	5.46009
																										SNU.119	OV	Tumor	6.00764	5.3837			SNU.119	OV	Tumor	6.00764	5.3837
																										JHOM.2B	OV	Tumor	7.30305	6.41346			JHOM.2B	OV	Tumor	7.30305	6.41346
																										OV.90	OV	Tumor	6.79325	5.54689			OV.90	OV	Tumor	6.79325	5.54689
																										OVTOKO	OV	Tumor	6.24603	4.40327			OVTOKO	OV	Tumor	6.24603	4.40327
																										OVCAR.4	OV	Tumor	6.65134	3.97453			OVCAR.4	OV	Tumor	6.65134	3.97453
																										Caov.4	OV	Tumor	6.28651	3.93923			Caov.4	OV	Tumor	6.28651	3.93923
																										SK.OV.3	OV	Tumor	7.60748	5.25323			SK.OV.3	OV	Tumor	7.60748	5.25323
																										NIH.OVCAR.3	OV	Tumor	6.53232	7.80826			NIH.OVCAR.3	OV	Tumor	6.53232	7.80826
																										COV362	OV	Tumor	6.4165	5.67751			COV362	OV	Tumor	6.4165	5.67751
																										COV434	OV	Tumor	5.94087	4.63923			COV434	OV	Tumor	5.94087	4.63923
																										COV644	OV	Tumor	5.71727	3.32912			COV644	OV	Tumor	5.71727	3.32912
																										OV7	OV	Tumor	7.30579	4.57833			OV7	OV	Tumor	7.30579	4.57833
																										OAW42	OV	Tumor	6.29829	3.61117			OAW42	OV	Tumor	6.29829	3.61117
																										OAW28	OV	Tumor	7.79889	5.79572			OAW28	OV	Tumor	7.79889	5.79572
																										OVCAR.8	OV	Tumor	6.23936	5.31578			OVCAR.8	OV	Tumor	6.23936	5.31578
																										OVMANA	OV	Tumor	4.33342	2.09085			OVMANA	OV	Tumor	4.33342	2.09085
																										X59M	OV	Tumor	5.92172	5.09085			X59M	OV	Tumor	5.92172	5.09085
																										KURAMOCHI	OV	Tumor	6.32373	4.56499			KURAMOCHI	OV	Tumor	6.32373	4.56499
																										SNU.840	OV	Tumor	6.95303	2.96901			SNU.840	OV	Tumor	6.95303	2.96901
																										SNU.8	OV	Tumor	6.52669	2.94673			SNU.8	OV	Tumor	6.52669	2.94673
																										JHOS.2	OV	Tumor	6.08937	4.36947			JHOS.2	OV	Tumor	6.08937	4.36947
																										OC.314	OV	Tumor	6.57713	5.35297			OC.314	OV	Tumor	6.57713	5.35297
																										Caov.3	OV	Tumor	7.11582	5.06523			Caov.3	OV	Tumor	7.11582	5.06523
																										MCAS	OV	Tumor	6.17313	4.9607			MCAS	OV	Tumor	6.17313	4.9607
																										EFO.27	OV	Tumor	6.44741	5.43962			EFO.27	OV	Tumor	6.44741	5.43962
																										A2780	OV	Tumor	7.13165	5.09845			A2780	OV	Tumor	7.13165	5.09845
																										IGROV1	OV	Tumor	6.46597	4.9991			IGROV1	OV	Tumor	6.46597	4.9991
																										TOV.21G	OV	Tumor	6.99469	4.76341			TOV.21G	OV	Tumor	6.99469	4.76341
																										OVSAHO	OV	Tumor	6.54936	4.48736			OVSAHO	OV	Tumor	6.54936	4.48736
																										FU.OV.1	OV	Tumor	5.98413	4.1914			FU.OV.1	OV	Tumor	5.98413	4.1914
																										Hey.A8	OV	Tumor	5.77241	5.48414			Hey.A8	OV	Tumor	5.77241	5.48414
																										TYK.nu	OV	Tumor	6.5624	5.12433			TYK.nu	OV	Tumor	6.5624	5.12433
																										OVISE	OV	Tumor	5.75596	3.9607			OVISE	OV	Tumor	5.75596	3.9607
																										OVKATE	OV	Tumor	6.51254	5.39438			OVKATE	OV	Tumor	6.51254	5.39438
																										ES.2	OV	Tumor	6.3726	5.01033			ES.2	OV	Tumor	6.3726	5.01033
																										TOV.112D	OV	Tumor	6.94895	4.65421			TOV.112D	OV	Tumor	6.94895	4.65421
																										EFO.21	OV	Tumor	6.10852	4.18507			EFO.21	OV	Tumor	6.10852	4.18507
																										RMG.I	OV	Tumor	6.1641	3.43829			RMG.I	OV	Tumor	6.1641	3.43829
																										OELE	OV	Tumor	6.69711	5.03958			OELE	OV	Tumor	6.69711	5.03958
																										ONCO.DG.1	OV	Tumor	6.58165	8.25361			ONCO.DG.1	OV	Tumor	6.58165	8.25361
																										KYSE.450	ESCA	Tumor	6.2636	5.83517			KYSE.450	ESCA	Tumor	6.2636	5.83517
																										TE.10	ESCA	Tumor	7.49793	4.14486			TE.10	ESCA	Tumor	7.49793	4.14486
																										TE.6	ESCA	Tumor	6.66249	5.67158			TE.6	ESCA	Tumor	6.66249	5.67158
																										TE.4	ESCA	Tumor	6.45105	5.13873			TE.4	ESCA	Tumor	6.45105	5.13873
																										EC.GI.10	ESCA	Tumor	6.38888	5.1035			EC.GI.10	ESCA	Tumor	6.38888	5.1035
																										TE.14	ESCA	Tumor	6.98709	4.0321			TE.14	ESCA	Tumor	6.98709	4.0321
																										TE.8	ESCA	Tumor	6.70086	4.82018			TE.8	ESCA	Tumor	6.70086	4.82018
																										OE33	ESCA	Tumor	6.78306	6.04789			OE33	ESCA	Tumor	6.78306	6.04789
																										KYSE.410	ESCA	Tumor	6.06695	3.23726			KYSE.410	ESCA	Tumor	6.06695	3.23726
																										KYSE.140	ESCA	Tumor	6.43962	6.49601			KYSE.140	ESCA	Tumor	6.43962	6.49601
																										KYSE.180	ESCA	Tumor	6.14241	4.37156			KYSE.180	ESCA	Tumor	6.14241	4.37156
																										TE.9	ESCA	Tumor	6.70653	3.5097			TE.9	ESCA	Tumor	6.70653	3.5097
																										KYSE.520	ESCA	Tumor	6.71053	4.90497			KYSE.520	ESCA	Tumor	6.71053	4.90497
																										KYSE.270	ESCA	Tumor	6.26922	4.53045			KYSE.270	ESCA	Tumor	6.26922	4.53045
																										NA..3	ESCA	Tumor	6.30159	5.31796			NA..3	ESCA	Tumor	6.30159	5.31796
																										KYSE.70	ESCA	Tumor	6.35067	5.21296			KYSE.70	ESCA	Tumor	6.35067	5.21296
																										TE.11	ESCA	Tumor	6.8627	4.31615			TE.11	ESCA	Tumor	6.8627	4.31615
																										TE.1	ESCA	Tumor	5.94111	5.85823			TE.1	ESCA	Tumor	5.94111	5.85823
																										TE.5	ESCA	Tumor	6.10161	4.00899			TE.5	ESCA	Tumor	6.10161	4.00899
																										TE.15	ESCA	Tumor	6.92386	6.33235			TE.15	ESCA	Tumor	6.92386	6.33235
																										OE19	ESCA	Tumor	6.25852	7.10119			OE19	ESCA	Tumor	6.25852	7.10119
																										KYSE.510	ESCA	Tumor	6.2032	4.14893			KYSE.510	ESCA	Tumor	6.2032	4.14893
																										KYSE.30	ESCA	Tumor	5.36107	5.0955			KYSE.30	ESCA	Tumor	5.36107	5.0955
																										KYSE.150	ESCA	Tumor	5.93239	5.48864			KYSE.150	ESCA	Tumor	5.93239	5.48864
																										JH.EsoAd1	ESCA	Tumor	6.6865	5.61677			JH.EsoAd1	ESCA	Tumor	6.6865	5.61677
																										COLO.680N	ESCA	Tumor	7.33199	6.51349			COLO.680N	ESCA	Tumor	7.33199	6.51349
																										OE21	ESCA	Tumor	5.20828	3.26903			OE21	ESCA	Tumor	5.20828	3.26903
																										KLE	UCEC	Tumor	7.43746	2.99277			KLE	UCEC	Tumor	7.43746	2.99277
																										SNG.M	UCEC	Tumor	6.20965	4.32481			SNG.M	UCEC	Tumor	6.20965	4.32481
																										HEC.151	UCEC	Tumor	5.1334	5.2521			HEC.151	UCEC	Tumor	5.1334	5.2521
																										HEC.1.B	UCEC	Tumor	5.72165	3.77083			HEC.1.B	UCEC	Tumor	5.72165	3.77083
																										SNU.1077	UCEC	Tumor	5.42055	3.8166			SNU.1077	UCEC	Tumor	5.42055	3.8166
																										JHUEM.3	UCEC	Tumor	7.12288	6.13155			JHUEM.3	UCEC	Tumor	7.12288	6.13155
																										RL95.2	UCEC	Tumor	6.73809	5.05355			RL95.2	UCEC	Tumor	6.73809	5.05355
																										MFE.280	UCEC	Tumor	7.32319	4.18031			MFE.280	UCEC	Tumor	7.32319	4.18031
																										MFE.319	UCEC	Tumor	7.20389	4.09761			MFE.319	UCEC	Tumor	7.20389	4.09761
																										MFE.296	UCEC	Tumor	7.36859	5.50843			MFE.296	UCEC	Tumor	7.36859	5.50843
																										EFE.184	UCEC	Tumor	5.24451	2.92029			EFE.184	UCEC	Tumor	5.24451	2.92029
																										HEC.108	UCEC	Tumor	6.78529	3.17473			HEC.108	UCEC	Tumor	6.78529	3.17473
																										HEC.265	UCEC	Tumor	6.64256	5.25663			HEC.265	UCEC	Tumor	6.64256	5.25663
																										HEC.6	UCEC	Tumor	7.1984	6.29094			HEC.6	UCEC	Tumor	7.1984	6.29094
																										HEC.50B	UCEC	Tumor	6.62615	4.80941			HEC.50B	UCEC	Tumor	6.62615	4.80941
																										TEN	UCEC	Tumor	5.68229	4.79546			TEN	UCEC	Tumor	5.68229	4.79546
																										JHUEM.1	UCEC	Tumor	7.06286	3.92979			JHUEM.1	UCEC	Tumor	7.06286	3.92979
																										HEC.251	UCEC	Tumor	5.93899	4.74093			HEC.251	UCEC	Tumor	5.93899	4.74093
																										Ishikawa..Heraklio..02.ER.	UCEC	Tumor	7.09961	5.1334			Ishikawa..Heraklio..02.ER.	UCEC	Tumor	7.09961	5.1334
																										COLO.684	UCEC	Tumor	7.10675	5.24375			COLO.684	UCEC	Tumor	7.10675	5.24375
																										SNU.685	UCEC	Tumor	5.84122	4.6017			SNU.685	UCEC	Tumor	5.84122	4.6017
																										HEC.59	UCEC	Tumor	6.85187	4.80219			HEC.59	UCEC	Tumor	6.85187	4.80219
																										EN	UCEC	Tumor	6.66391	5.46989			EN	UCEC	Tumor	6.66391	5.46989
																										ESS.1	UCEC	Tumor	6.89154	4.17153			ESS.1	UCEC	Tumor	6.89154	4.17153
																										HEC.1.A	UCEC	Tumor	6.52293	5.0917			HEC.1.A	UCEC	Tumor	6.52293	5.0917
																										JHUEM.2	UCEC	Tumor	7.71973	5.70349			JHUEM.2	UCEC	Tumor	7.71973	5.70349
																										AN3.CA	UCEC	Tumor	7.55152	5.4121			AN3.CA	UCEC	Tumor	7.55152	5.4121
																										JHUEM.7	UCEC	Tumor	6.14893	4.54535			JHUEM.7	UCEC	Tumor	6.14893	4.54535
																										LN.229	GBM	Tumor	6.98356	5.98094			LN.229	GBM	Tumor	6.98356	5.98094
																										SF126	GBM	Tumor	7.57016	5.15987			SF126	GBM	Tumor	7.57016	5.15987
																										TM.31	GBM	Tumor	7.17582	3.51728			TM.31	GBM	Tumor	7.17582	3.51728
																										SF.295	GBM	Tumor	7.30551	3.78136			SF.295	GBM	Tumor	7.30551	3.78136
																										M059K	GBM	Tumor	7.65693	5.12267			M059K	GBM	Tumor	7.65693	5.12267
																										GOS.3	GBM	Tumor	6.14098	4.81967			GOS.3	GBM	Tumor	6.14098	4.81967
																										KNS.60	GBM	Tumor	6.79116	4.88411			KNS.60	GBM	Tumor	6.79116	4.88411
																										KNS.81	GBM	Tumor	5.96694	4.56194			KNS.81	GBM	Tumor	5.96694	4.56194
																										KG.1.C	GBM	Tumor	5.72928	5.21762			KG.1.C	GBM	Tumor	5.72928	5.21762
																										AM.38	GBM	Tumor	7.48357	6.10392			AM.38	GBM	Tumor	7.48357	6.10392
																										CAS.1	GBM	Tumor	6.52482	4.67638			CAS.1	GBM	Tumor	6.52482	4.67638
																										YH.13	GBM	Tumor	6.96728	4.58256			YH.13	GBM	Tumor	6.96728	4.58256
																										DK.MG	GBM	Tumor	6.89409	5.34979			DK.MG	GBM	Tumor	6.89409	5.34979
																										U.118.MG	GBM	Tumor	6.69167	5.30159			U.118.MG	GBM	Tumor	6.69167	5.30159
																										GB.1	GBM	Tumor	6.80142	3.97453			GB.1	GBM	Tumor	6.80142	3.97453
																										SNU.489	GBM	Tumor	5.84373	3.8846			SNU.489	GBM	Tumor	5.84373	3.8846
																										SNU.201	GBM	Tumor	6.52419	4.54473			SNU.201	GBM	Tumor	6.52419	4.54473
																										SNU.466	GBM	Tumor	7.26959	3.55949			SNU.466	GBM	Tumor	7.26959	3.55949
																										SNU.1105	GBM	Tumor	7.38603	5.00764			SNU.1105	GBM	Tumor	7.38603	5.00764
																										SNU.738	GBM	Tumor	6.46744	4.29278			SNU.738	GBM	Tumor	6.46744	4.29278
																										SNU.626	GBM	Tumor	6.24012	4.73118			SNU.626	GBM	Tumor	6.24012	4.73118
																										CCF.STTG1	GBM	Tumor	7.76115	4.09085			CCF.STTG1	GBM	Tumor	7.76115	4.09085
																										SW.1088	GBM	Tumor	7.19938	5.67214			SW.1088	GBM	Tumor	7.19938	5.67214
																										LN.18	GBM	Tumor	7.88234	4.69711			LN.18	GBM	Tumor	7.88234	4.69711
																										T98G	GBM	Tumor	6.99164	4.41481			T98G	GBM	Tumor	6.99164	4.41481
																										DBTRG.05MG	GBM	Tumor	6.88606	5.61765			DBTRG.05MG	GBM	Tumor	6.88606	5.61765
																										A172	GBM	Tumor	6.43896	5.55919			A172	GBM	Tumor	6.43896	5.55919
																										GMS.10	GBM	Tumor	7.85144	4.88899			GMS.10	GBM	Tumor	7.85144	4.88899
																										X42.MG.BA	GBM	Tumor	7.5127	4.97039			X42.MG.BA	GBM	Tumor	7.5127	4.97039
																										YKG1	GBM	Tumor	6.88472	4.66846			YKG1	GBM	Tumor	6.88472	4.66846
																										U.251.MG	GBM	Tumor	6.42911	4.42291			U.251.MG	GBM	Tumor	6.42911	4.42291
																										KS.1	GBM	Tumor	6.88496	4.76288			KS.1	GBM	Tumor	6.88496	4.76288
																										X8.MG.BA	GBM	Tumor	6.01279	5.59574			X8.MG.BA	GBM	Tumor	6.01279	5.59574
																										U.87.MG	GBM	Tumor	6.74389	4.62585			U.87.MG	GBM	Tumor	6.74389	4.62585
																										LN.443	GBM	Tumor	8.04761	5.43663			LN.443	GBM	Tumor	8.04761	5.43663
																										LN.235	GBM	Tumor	7.10842	4.12928			LN.235	GBM	Tumor	7.10842	4.12928
																										LN.428	GBM	Tumor	6.21023	4.40531			LN.428	GBM	Tumor	6.21023	4.40531
																										SF.172	GBM	Tumor	5.17073	3.06005			SF.172	GBM	Tumor	5.17073	3.06005
																										U343	GBM	Tumor	6.40139	5.00988			U343	GBM	Tumor	6.40139	5.00988
																										LN.215	GBM	Tumor	6.46728	5.81019			LN.215	GBM	Tumor	6.46728	5.81019
																										LN.464	GBM	Tumor	6.79403	5.03562			LN.464	GBM	Tumor	6.79403	5.03562
																										U.178	GBM	Tumor	6.94474	4.0798			U.178	GBM	Tumor	6.94474	4.0798
																										A1207	GBM	Tumor	6.40888	5.57319			A1207	GBM	Tumor	6.40888	5.57319
																										LN.319	GBM	Tumor	6.46597	3.89045			LN.319	GBM	Tumor	6.46597	3.89045
																										LN382	GBM	Tumor	7.00551	4.30305			LN382	GBM	Tumor	7.00551	4.30305
																										LN.340	GBM	Tumor	6.53761	5.50112			LN.340	GBM	Tumor	6.53761	5.50112
																										SF268	GBM	Tumor	8.43833	4.91791			SF268	GBM	Tumor	8.43833	4.91791
																										SNB75	GBM	Tumor	7.5697	5.27426			SNB75	GBM	Tumor	7.5697	5.27426
																										PA.TU.8988S	PAAD	Tumor	6.76845	6.0542			PA.TU.8988S	PAAD	Tumor	6.76845	6.0542
																										SW.1990	PAAD	Tumor	7.76825	4.30451			SW.1990	PAAD	Tumor	7.76825	4.30451
																										PANC.1	PAAD	Tumor	7.0863	5.25965			PANC.1	PAAD	Tumor	7.0863	5.25965
																										HPAC	PAAD	Tumor	5.54905	4.64731			HPAC	PAAD	Tumor	5.54905	4.64731
																										SU.86.86	PAAD	Tumor	6.52419	5.57289			SU.86.86	PAAD	Tumor	6.52419	5.57289
																										Panc.02.03	PAAD	Tumor	6.29774	5.30779			Panc.02.03	PAAD	Tumor	6.29774	5.30779
																										SNU.324	PAAD	Tumor	6.57698	4.5008			SNU.324	PAAD	Tumor	6.57698	4.5008
																										SNU.213	PAAD	Tumor	6.8711	5.11478			SNU.213	PAAD	Tumor	6.8711	5.11478
																										PA.TU.8902	PAAD	Tumor	6.00315	5.13545			PA.TU.8902	PAAD	Tumor	6.00315	5.13545
																										DAN.G	PAAD	Tumor	6.84411	5.32733			DAN.G	PAAD	Tumor	6.84411	5.32733
																										HUP.T3	PAAD	Tumor	6.91049	4.85997			HUP.T3	PAAD	Tumor	6.91049	4.85997
																										KP.3	PAAD	Tumor	5.92624	5.17153			KP.3	PAAD	Tumor	5.92624	5.17153
																										KP4	PAAD	Tumor	7.10559	5.33735			KP4	PAAD	Tumor	7.10559	5.33735
																										HPAF.II	PAAD	Tumor	6.63285	5.62264			HPAF.II	PAAD	Tumor	6.63285	5.62264
																										Capan.1	PAAD	Tumor	6.39678	5.26416			Capan.1	PAAD	Tumor	6.39678	5.26416
																										CFPAC.1	PAAD	Tumor	6.17433	5.22304			CFPAC.1	PAAD	Tumor	6.17433	5.22304
																										Panc.02.13	PAAD	Tumor	6.63372	5.83112			Panc.02.13	PAAD	Tumor	6.63372	5.83112
																										BxPC.3	PAAD	Tumor	7.29241	5.8885			BxPC.3	PAAD	Tumor	7.29241	5.8885
																										SUIT.2	PAAD	Tumor	6.72	5.91791			SUIT.2	PAAD	Tumor	6.72	5.91791
																										YAPC	PAAD	Tumor	7.38517	6.765			YAPC	PAAD	Tumor	7.38517	6.765
																										SNU.410	PAAD	Tumor	6.6011	4.20789			SNU.410	PAAD	Tumor	6.6011	4.20789
																										T3M.4	PAAD	Tumor	5.75916	3.97085			T3M.4	PAAD	Tumor	5.75916	3.97085
																										PK.45H	PAAD	Tumor	7.17762	5.35931			PK.45H	PAAD	Tumor	7.17762	5.35931
																										Panc.08.13	PAAD	Tumor	6.36667	6.06372			Panc.08.13	PAAD	Tumor	6.36667	6.06372
																										PK.1	PAAD	Tumor	6.49633	5.82629			PK.1	PAAD	Tumor	6.49633	5.82629
																										Panc.05.04	PAAD	Tumor	7.41185	5.78999			Panc.05.04	PAAD	Tumor	7.41185	5.78999
																										MIA.PaCa.2	PAAD	Tumor	6.83289	3.86691			MIA.PaCa.2	PAAD	Tumor	6.83289	3.86691
																										Capan.2	PAAD	Tumor	6.28744	5.40361			Capan.2	PAAD	Tumor	6.28744	5.40361
																										Hs.766T	PAAD	Tumor	6.45598	4.15704			Hs.766T	PAAD	Tumor	6.45598	4.15704
																										Panc.10.05	PAAD	Tumor	5.69822	5.27873			Panc.10.05	PAAD	Tumor	5.69822	5.27873
																										AsPC.1	PAAD	Tumor	5.95187	5.88801			AsPC.1	PAAD	Tumor	5.95187	5.88801
																										L3.3	PAAD	Tumor	6.42744	5.07639			L3.3	PAAD	Tumor	6.42744	5.07639
																										KP.2	PAAD	Tumor	5.54164	4.37434			KP.2	PAAD	Tumor	5.54164	4.37434
																										Panc.04.03	PAAD	Tumor	6.04483	5.71918			Panc.04.03	PAAD	Tumor	6.04483	5.71918
																										PK.59	PAAD	Tumor	6.13955	3.41414			PK.59	PAAD	Tumor	6.13955	3.41414
																										QGP.1	PAAD	Tumor	6.08683	5.22689			QGP.1	PAAD	Tumor	6.08683	5.22689
																										Panc.03.27	PAAD	Tumor	6.23974	4.33771			Panc.03.27	PAAD	Tumor	6.23974	4.33771
																										TCC.PAN2	PAAD	Tumor	6.5601	4.06609			TCC.PAN2	PAAD	Tumor	6.5601	4.06609
																										HUP.T4	PAAD	Tumor	6.01569	1.1177			HUP.T4	PAAD	Tumor	6.01569	1.1177
																										PSN1	PAAD	Tumor	6.62483	5.25285			PSN1	PAAD	Tumor	6.62483	5.25285
																										PA.TU.8988T	PAAD	Tumor	7.06706	5.4266			PA.TU.8988T	PAAD	Tumor	7.06706	5.4266
																										NH.6	NB	Tumor	7.34359	5.38853			NH.6	NB	Tumor	7.34359	5.38853
																										KP.N.RT.BM.1	NB	Tumor	7.5142	4.3512			KP.N.RT.BM.1	NB	Tumor	7.5142	4.3512
																										KP.N.SI9s	NB	Tumor	6.43363	4.08236			KP.N.SI9s	NB	Tumor	6.43363	4.08236
																										SK.N.SH	NB	Tumor	7.16269	4.0321			SK.N.SH	NB	Tumor	7.16269	4.0321
																										SK.N.FI	NB	Tumor	6.72137	5.1235			SK.N.FI	NB	Tumor	6.72137	5.1235
																										SK.N.AS	NB	Tumor	6.80426	4.36177			SK.N.AS	NB	Tumor	6.80426	4.36177
																										IMR.32	NB	Tumor	6.87922	4.80374			IMR.32	NB	Tumor	6.87922	4.80374
																										KP.N.YN	NB	Tumor	7.32957	5.2902			KP.N.YN	NB	Tumor	7.32957	5.2902
																										SK.N.BE.2.	NB	Tumor	6.98789	4.35191			SK.N.BE.2.	NB	Tumor	6.98789	4.35191
																										SK.N.DZ	NB	Tumor	5.83036	5.69516			SK.N.DZ	NB	Tumor	5.83036	5.69516
																										KELLY	NB	Tumor	5.57016	4.68089			KELLY	NB	Tumor	5.57016	4.68089
																										CHP.212	NB	Tumor	6.90364	4.65992			CHP.212	NB	Tumor	6.90364	4.65992
																										MHH.NB.11	NB	Tumor	6.67313	2.55336			MHH.NB.11	NB	Tumor	6.67313	2.55336
																										CHP.126	NB	Tumor	6.93593	4.59872			CHP.126	NB	Tumor	6.93593	4.59872
																										NB.1	NB	Tumor	6.04898	6.47557			NB.1	NB	Tumor	6.04898	6.47557
																										SIMA	NB	Tumor	6.644	4.59216			SIMA	NB	Tumor	6.644	4.59216
																										RERF.LC.Ad2	LUAD	Tumor	6.19948	6.03914			RERF.LC.Ad2	LUAD	Tumor	6.19948	6.03914
																										NCI.H2347	LUAD	Tumor	7.28207	5.15826			NCI.H2347	LUAD	Tumor	7.28207	5.15826
																										NCI.H2087	LUAD	Tumor	6.52136	6.20867			NCI.H2087	LUAD	Tumor	6.52136	6.20867
																										NCI.H2085	LUAD	Tumor	6.41329	5.13011			NCI.H2085	LUAD	Tumor	6.41329	5.13011
																										NCI.H1573	LUAD	Tumor	7.24926	6.40429			NCI.H1573	LUAD	Tumor	7.24926	6.40429
																										NCI.H1651	LUAD	Tumor	6.35544	5.51728			NCI.H1651	LUAD	Tumor	6.35544	5.51728
																										NCI.H1666	LUAD	Tumor	5.86987	3.37712			NCI.H1666	LUAD	Tumor	5.86987	3.37712
																										NCI.H1734	LUAD	Tumor	7.11707	5.66732			NCI.H1734	LUAD	Tumor	7.11707	5.66732
																										NCI.H2342	LUAD	Tumor	6.86938	5.30305			NCI.H2342	LUAD	Tumor	6.86938	5.30305
																										NCI.H322	LUAD	Tumor	6.48365	5.14445			NCI.H322	LUAD	Tumor	6.48365	5.14445
																										Hs.618.T	LUAD	Tumor	7.22323	5.36877			Hs.618.T	LUAD	Tumor	7.22323	5.36877
																										NCI.H2291	LUAD	Tumor	5.99707	5.09043			NCI.H2291	LUAD	Tumor	5.99707	5.09043
																										COR.L105	LUAD	Tumor	7.09961	4.93829			COR.L105	LUAD	Tumor	7.09961	4.93829
																										HCC.2279	LUAD	Tumor	7.19131	4.61353			HCC.2279	LUAD	Tumor	7.19131	4.61353
																										NCI.H838	LUAD	Tumor	5.99684	4.29646			NCI.H838	LUAD	Tumor	5.99684	4.29646
																										NCI.H2228	LUAD	Tumor	6.98094	5.97705			NCI.H2228	LUAD	Tumor	6.98094	5.97705
																										Calu.6	LUAD	Tumor	6.59828	4.29646			Calu.6	LUAD	Tumor	6.59828	4.29646
																										SK.LU.1	LUAD	Tumor	5.55796	4.01614			SK.LU.1	LUAD	Tumor	5.55796	4.01614
																										PC.14	LUAD	Tumor	6.22265	5.60585			PC.14	LUAD	Tumor	6.22265	5.60585
																										RERF.LC.MS	LUAD	Tumor	6.64414	3.0635			RERF.LC.MS	LUAD	Tumor	6.64414	3.0635
																										MOR.CPR	LUAD	Tumor	5.79805	4.58075			MOR.CPR	LUAD	Tumor	5.79805	4.58075
																										NCI.H1568	LUAD	Tumor	6.70805	5.09085			NCI.H1568	LUAD	Tumor	6.70805	5.09085
																										NCI.H1563	LUAD	Tumor	7.43246	4.749			NCI.H1563	LUAD	Tumor	7.43246	4.749
																										NCI.H358	LUAD	Tumor	7.06781	6.3025			NCI.H358	LUAD	Tumor	7.06781	6.3025
																										NCI.H1650	LUAD	Tumor	6.45105	4.6311			NCI.H1650	LUAD	Tumor	6.45105	4.6311
																										NCI.H1793	LUAD	Tumor	6.42122	4.47962			NCI.H1793	LUAD	Tumor	6.42122	4.47962
																										NCI.H1437	LUAD	Tumor	7.36238	4.99729			NCI.H1437	LUAD	Tumor	7.36238	4.99729
																										NCI.H1792	LUAD	Tumor	6.72069	5.31904			NCI.H1792	LUAD	Tumor	6.72069	5.31904
																										NCI.H1355	LUAD	Tumor	6.53154	5.47994			NCI.H1355	LUAD	Tumor	6.53154	5.47994
																										HCC.2108	LUAD	Tumor	6.82947	5.66789			HCC.2108	LUAD	Tumor	6.82947	5.66789
																										NCI.H596	LUAD	Tumor	6.13052	5.64357			NCI.H596	LUAD	Tumor	6.13052	5.64357
																										NCI.H650	LUAD	Tumor	6.29994	6.21082			NCI.H650	LUAD	Tumor	6.29994	6.21082
																										SW.1573	LUAD	Tumor	6.37573	5.14893			SW.1573	LUAD	Tumor	6.37573	5.14893
																										HCC.366	LUAD	Tumor	7.46066	4.98778			HCC.366	LUAD	Tumor	7.46066	4.98778
																										HCC.1833	LUAD	Tumor	7.23064	5.17552			HCC.1833	LUAD	Tumor	7.23064	5.17552
																										NCI.H3255	LUAD	Tumor	7.80993	5.18982			NCI.H3255	LUAD	Tumor	7.80993	5.18982
																										HCC.1195	LUAD	Tumor	6.74376	5.57803			HCC.1195	LUAD	Tumor	6.74376	5.57803
																										NCI.H854	LUAD	Tumor	7.07916	7.28253			NCI.H854	LUAD	Tumor	7.07916	7.28253
																										NCI.H2023	LUAD	Tumor	5.66818	4.30012			NCI.H2023	LUAD	Tumor	5.66818	4.30012
																										DV.90	LUAD	Tumor	6.70169	4.78398			DV.90	LUAD	Tumor	6.70169	4.78398
																										NCI.H1648	LUAD	Tumor	6.25304	5.7866			NCI.H1648	LUAD	Tumor	6.25304	5.7866
																										NCI.H23	LUAD	Tumor	5.53512	3.96625			NCI.H23	LUAD	Tumor	5.53512	3.96625
																										NCI.H1373	LUAD	Tumor	6.70764	5.27873			NCI.H1373	LUAD	Tumor	6.70764	5.27873
																										NCI.H1623	LUAD	Tumor	6.38388	4.9222			NCI.H1623	LUAD	Tumor	6.38388	4.9222
																										Hs.229.T	LUAD	Tumor	7.41405	5.2604			Hs.229.T	LUAD	Tumor	7.41405	5.2604
																										NCI.H1838	LUAD	Tumor	6.18249	5.91743			NCI.H1838	LUAD	Tumor	6.18249	5.91743
																										NCI.H1755	LUAD	Tumor	6.99254	4.78031			NCI.H1755	LUAD	Tumor	6.99254	4.78031
																										RERF.LC.KJ	LUAD	Tumor	6.97545	5.04002			RERF.LC.KJ	LUAD	Tumor	6.97545	5.04002
																										NCI.H1693	LUAD	Tumor	6.13812	5.38128			NCI.H1693	LUAD	Tumor	6.13812	5.38128
																										NCI.H441	LUAD	Tumor	6.30816	7.01948			NCI.H441	LUAD	Tumor	6.30816	7.01948
																										NCI.H2030	LUAD	Tumor	7.55804	5.02857			NCI.H2030	LUAD	Tumor	7.55804	5.02857
																										NCI.H2122	LUAD	Tumor	6.56346	4.50906			NCI.H2122	LUAD	Tumor	6.56346	4.50906
																										A549	LUAD	Tumor	5.7148	4.64212			A549	LUAD	Tumor	5.7148	4.64212
																										NCI.H1975	LUAD	Tumor	6.74322	5.72874			NCI.H1975	LUAD	Tumor	6.74322	5.72874
																										NCI.H647	LUAD	Tumor	7.29948	5.27053			NCI.H647	LUAD	Tumor	7.29948	5.27053
																										HCC.44	LUAD	Tumor	5.779	3.0993			HCC.44	LUAD	Tumor	5.779	3.0993
																										NCI.H522	LUAD	Tumor	6.85649	5.71589			NCI.H522	LUAD	Tumor	6.85649	5.71589
																										HCC.78	LUAD	Tumor	6.74403	5.48027			HCC.78	LUAD	Tumor	6.74403	5.48027
																										RERF.LC.Ad1	LUAD	Tumor	6.45154	6.08002			RERF.LC.Ad1	LUAD	Tumor	6.45154	6.08002
																										ABC.1	LUAD	Tumor	5.41549	4.488			ABC.1	LUAD	Tumor	5.41549	4.488
																										NCI.H1395	LUAD	Tumor	5.99141	5.4019			NCI.H1395	LUAD	Tumor	5.99141	5.4019
																										NCI.H1781	LUAD	Tumor	8.02763	5.45648			NCI.H1781	LUAD	Tumor	8.02763	5.45648
																										NCI.H2126	LUAD	Tumor	7.27398	5.36667			NCI.H2126	LUAD	Tumor	7.27398	5.36667
																										HCC827	LUAD	Tumor	6.1079	5.12184			HCC827	LUAD	Tumor	6.1079	5.12184
																										LXF.289	LUAD	Tumor	6.33342	4.67129			LXF.289	LUAD	Tumor	6.33342	4.67129
																										Calu.3	LUAD	Tumor	5.44758	4.76022			Calu.3	LUAD	Tumor	5.44758	4.76022
																										NCI.H1435	LUAD	Tumor	6.56986	5.95093			NCI.H1435	LUAD	Tumor	6.56986	5.95093
																										NCI.H2009	LUAD	Tumor	6.3665	5.66732			NCI.H2009	LUAD	Tumor	6.3665	5.66732
																										HCC4006	LUAD	Tumor	7.26435	5.58466			HCC4006	LUAD	Tumor	7.26435	5.58466
																										NCI.H1944	LUAD	Tumor	6.62483	4.0321			NCI.H1944	LUAD	Tumor	6.62483	4.0321
																										NCI.H2405	LUAD	Tumor	6.80594	5.27873			NCI.H2405	LUAD	Tumor	6.80594	5.27873
																										NCI.H2073	LUAD	Tumor	6.69112	4.68482			NCI.H2073	LUAD	Tumor	6.69112	4.68482
																										HOP.62	LUAD	Tumor	6.85674	4.24031			HOP.62	LUAD	Tumor	6.85674	4.24031
																										EKVX	LUAD	Tumor	6.43229	5.11728			EKVX	LUAD	Tumor	6.43229	5.11728
																										NA..4	LUAD	Tumor	6.79246	5.15299			NA..4	LUAD	Tumor	6.79246	5.15299
																										NA..5	LUAD	Tumor	6.01302	5.15583			NA..5	LUAD	Tumor	6.01302	5.15583
																										RERF.GC.1B	STAD	Tumor	6.21917	6.19849			RERF.GC.1B	STAD	Tumor	6.21917	6.19849
																										Hs.746T	STAD	Tumor	6.99763	6.82769			Hs.746T	STAD	Tumor	6.99763	6.82769
																										LMSU	STAD	Tumor	6.97762	4.69321			LMSU	STAD	Tumor	6.97762	4.69321
																										ECC10	STAD	Tumor	7	5.49953			ECC10	STAD	Tumor	7	5.49953
																										TGBC11TKB	STAD	Tumor	6.69153	5.06264			TGBC11TKB	STAD	Tumor	6.69153	5.06264
																										SNU.520	STAD	Tumor	6.69544	5.98071			SNU.520	STAD	Tumor	6.69544	5.98071
																										GSS	STAD	Tumor	5.77452	5.42928			GSS	STAD	Tumor	5.77452	5.42928
																										SNU.620	STAD	Tumor	6.99865	6.20926			SNU.620	STAD	Tumor	6.99865	6.20926
																										ECC12	STAD	Tumor	6.39146	4.54411			ECC12	STAD	Tumor	6.39146	4.54411
																										GSU	STAD	Tumor	6.90881	5.74389			GSU	STAD	Tumor	6.90881	5.74389
																										FU97	STAD	Tumor	5.74578	1.18903			FU97	STAD	Tumor	5.74578	1.18903
																										GCIY	STAD	Tumor	6.16128	5.38509			GCIY	STAD	Tumor	6.16128	5.38509
																										SH.10.TC	STAD	Tumor	6.78581	4.65134			SH.10.TC	STAD	Tumor	6.78581	4.65134
																										MKN1	STAD	Tumor	7.41979	4.09592			MKN1	STAD	Tumor	7.41979	4.09592
																										MKN74	STAD	Tumor	5.80529	5.55152			MKN74	STAD	Tumor	5.80529	5.55152
																										KE.39	STAD	Tumor	6.75876	6.43095			KE.39	STAD	Tumor	6.75876	6.43095
																										HGC.27	STAD	Tumor	7.39832	4.55949			HGC.27	STAD	Tumor	7.39832	4.55949
																										HuG1.N	STAD	Tumor	6.70998	5.34979			HuG1.N	STAD	Tumor	6.70998	5.34979
																										NUGC.4	STAD	Tumor	6.12081	4.50016			NUGC.4	STAD	Tumor	6.12081	4.50016
																										SNU.16	STAD	Tumor	7.11405	5.92315			SNU.16	STAD	Tumor	7.11405	5.92315
																										NCI.N87	STAD	Tumor	5.58346	5.54009			NCI.N87	STAD	Tumor	5.58346	5.54009
																										OCUM.1	STAD	Tumor	7.45492	6.13873			OCUM.1	STAD	Tumor	7.45492	6.13873
																										SNU.5	STAD	Tumor	6.4099	5.32229			SNU.5	STAD	Tumor	6.4099	5.32229
																										SNU.601	STAD	Tumor	6.35438	5.59962			SNU.601	STAD	Tumor	6.35438	5.59962
																										SNU.668	STAD	Tumor	7.32427	4.49761			SNU.668	STAD	Tumor	7.32427	4.49761
																										NCC.StC.K140	STAD	Tumor	6.65449	5.83086			NCC.StC.K140	STAD	Tumor	6.65449	5.83086
																										SNU.719	STAD	Tumor	7.24355	7.08204			SNU.719	STAD	Tumor	7.24355	7.08204
																										SNU.216	STAD	Tumor	7.04636	4.99503			SNU.216	STAD	Tumor	7.04636	4.99503
																										NUGC.2	STAD	Tumor	7.12422	5.88826			NUGC.2	STAD	Tumor	7.12422	5.88826
																										SNU.1	STAD	Tumor	7.02835	4.91839			SNU.1	STAD	Tumor	7.02835	4.91839
																										AGS	STAD	Tumor	7.22574	5.59066			AGS	STAD	Tumor	7.22574	5.59066
																										KATO.III	STAD	Tumor	6.67469	6.69655			KATO.III	STAD	Tumor	6.67469	6.69655
																										NUGC.3	STAD	Tumor	5.43962	1.18903			NUGC.3	STAD	Tumor	5.43962	1.18903
																										IM95	STAD	Tumor	6.76368	5.67243			IM95	STAD	Tumor	6.76368	5.67243
																										MKN7	STAD	Tumor	6.35544	4.21723			MKN7	STAD	Tumor	6.35544	4.21723
																										MKN.45	STAD	Tumor	6.88044	9.04811			MKN.45	STAD	Tumor	6.88044	9.04811
																										X23132.87	STAD	Tumor	7.00011	4.31759			X23132.87	STAD	Tumor	7.00011	4.31759
																										Caki.1	KIRC	Tumor	5.07296	4.74308			Caki.1	KIRC	Tumor	5.07296	4.74308
																										TUHR4TKB	KIRC	Tumor	5.35368	4.62761			TUHR4TKB	KIRC	Tumor	5.35368	4.62761
																										RCC10RGB	KIRC	Tumor	5.67948	4.25927			RCC10RGB	KIRC	Tumor	5.67948	4.25927
																										OS.RC.2	KIRC	Tumor	6.49442	5.45976			OS.RC.2	KIRC	Tumor	6.49442	5.45976
																										SNU.1272	KIRC	Tumor	5.3733	4.83491			SNU.1272	KIRC	Tumor	5.3733	4.83491
																										TUHR14TKB	KIRC	Tumor	5.14405	4.3505			TUHR14TKB	KIRC	Tumor	5.14405	4.3505
																										TUHR10TKB	KIRC	Tumor	6.54581	5.18785			TUHR10TKB	KIRC	Tumor	6.54581	5.18785
																										KMRC.20	KIRC	Tumor	6.03232	5.01078			KMRC.20	KIRC	Tumor	6.03232	5.01078
																										VMRC.RCW	KIRC	Tumor	4.99774	4.33914			VMRC.RCW	KIRC	Tumor	4.99774	4.33914
																										A.498	KIRC	Tumor	5.66874	4.63169			A.498	KIRC	Tumor	5.66874	4.63169
																										A.704	KIRC	Tumor	4.61706	4.32841			A.704	KIRC	Tumor	4.61706	4.32841
																										SNU.349	KIRC	Tumor	6.72397	5.14486			SNU.349	KIRC	Tumor	6.72397	5.14486
																										KMRC.3	KIRC	Tumor	7.1979	6.12453			KMRC.3	KIRC	Tumor	7.1979	6.12453
																										X769.P	KIRC	Tumor	5.7952	4.96394			X769.P	KIRC	Tumor	5.7952	4.96394
																										X786.O	KIRC	Tumor	5.94813	5.16108			X786.O	KIRC	Tumor	5.94813	5.16108
																										VMRC.RCZ	KIRC	Tumor	5.51001	4.55827			VMRC.RCZ	KIRC	Tumor	5.51001	4.55827
																										ACHN	KIRC	Tumor	6.29957	4.62469			ACHN	KIRC	Tumor	6.29957	4.62469
																										Caki.2	KIRC	Tumor	6.21023	4.64155			Caki.2	KIRC	Tumor	6.21023	4.64155
																										KMRC.2	KIRC	Tumor	5.01346	4.71205			KMRC.2	KIRC	Tumor	5.01346	4.71205
																										KMRC.1	KIRC	Tumor	4.6311	4.78712			KMRC.1	KIRC	Tumor	4.6311	4.78712
																										SLR.23	KIRC	Tumor	5.70044	3.61589			SLR.23	KIRC	Tumor	5.70044	3.61589
																										SLR.24	KIRC	Tumor	4.97269	4.64789			SLR.24	KIRC	Tumor	4.97269	4.64789
																										SLR.25	KIRC	Tumor	6.62775	4.393			SLR.25	KIRC	Tumor	6.62775	4.393
																										HEK.TE	KIRC	Tumor	6.43513	4.75916			HEK.TE	KIRC	Tumor	6.43513	4.75916
																										SLR.26	KIRC	Tumor	6.51365	4.46074			SLR.26	KIRC	Tumor	6.51365	4.46074
																										SK.RC.20	KIRC	Tumor	5.62585	5.8505			SK.RC.20	KIRC	Tumor	5.62585	5.8505
																										SLR.21	KIRC	Tumor	5.87578	4.8485			SLR.21	KIRC	Tumor	5.87578	4.8485
																										SLR.20	KIRC	Tumor	7.09244	5.16591			SLR.20	KIRC	Tumor	7.09244	5.16591
																										UOK101	KIRC	Tumor	6.00113	4.63459			UOK101	KIRC	Tumor	6.00113	4.63459
																										CAL.54	KIRC	Tumor	5.96324	5.17153			CAL.54	KIRC	Tumor	5.96324	5.17153
																										BFTC.909	KIRC	Tumor	6.33878	4.43095			BFTC.909	KIRC	Tumor	6.33878	4.43095
																										UO.31	KIRC	Tumor	6.25569	5.33235			UO.31	KIRC	Tumor	6.25569	5.33235
																										NA..6	KIRC	Tumor	6.34394	5.854			NA..6	KIRC	Tumor	6.34394	5.854
																										LU65	NSC	Tumor	6.71205	4.39712			LU65	NSC	Tumor	6.71205	4.39712
																										NCI.H1915	NSC	Tumor	6.30488	4.97085			NCI.H1915	NSC	Tumor	6.30488	4.97085
																										HCC.1171	NSC	Tumor	7.23774	5.1815			HCC.1171	NSC	Tumor	7.23774	5.1815
																										NCI.H810	NSC	Tumor	6.82528	4.9542			NCI.H810	NSC	Tumor	6.82528	4.9542
																										NCI.H460	NSC	Tumor	7.18725	4.24565			NCI.H460	NSC	Tumor	7.18725	4.24565
																										LU99	NSC	Tumor	5.96555	4.14731			LU99	NSC	Tumor	5.96555	4.14731
																										CAL.12T	NSC	Tumor	6.63778	0.505891			CAL.12T	NSC	Tumor	6.63778	0.505891
																										COR.L23	NSC	Tumor	6.12288	5.42761			COR.L23	NSC	Tumor	6.12288	5.42761
																										IA.LM	NSC	Tumor	6.76938	4.61176			IA.LM	NSC	Tumor	6.76938	4.61176
																										HCC.1438	NSC	Tumor	7.19948	5.55397			HCC.1438	NSC	Tumor	7.19948	5.55397
																										HCC.1359	NSC	Tumor	7.29572	4.90207			HCC.1359	NSC	Tumor	7.29572	4.90207
																										NCI.H2110	NSC	Tumor	6.56514	6.24336			NCI.H2110	NSC	Tumor	6.56514	6.24336
																										ChaGo.K.1	NSC	Tumor	6.59694	4.48156			ChaGo.K.1	NSC	Tumor	6.59694	4.48156
																										NCI.H2172	NSC	Tumor	6.96578	3.87578			NCI.H2172	NSC	Tumor	6.96578	3.87578
																										NCI.H292	NSC	Tumor	6.26491	4.72356			NCI.H292	NSC	Tumor	6.26491	4.72356
																										T3M.10	NSC	Tumor	8.10224	5.66619			T3M.10	NSC	Tumor	8.10224	5.66619
																										NCI.H661	NSC	Tumor	7.41684	5.09085			NCI.H661	NSC	Tumor	7.41684	5.09085
																										NCI.H1155	NSC	Tumor	7.62483	6.28096			NCI.H1155	NSC	Tumor	7.62483	6.28096
																										NCI.H1581	NSC	Tumor	7.35799	3.54102			NCI.H1581	NSC	Tumor	7.35799	3.54102
																										NCI.H2106	NSC	Tumor	7.51396	6.94416			NCI.H2106	NSC	Tumor	7.51396	6.94416
																										NCI.H2444	NSC	Tumor	6.54365	4.65535			NCI.H2444	NSC	Tumor	6.54365	4.65535
																										NCI.H1299	NSC	Tumor	7.12039	4.83794			NCI.H1299	NSC	Tumor	7.12039	4.83794
																										HCC.2814	NSC	Tumor	7.33682	5.35685			HCC.2814	NSC	Tumor	7.33682	5.35685
																										HCC364	NSC	Tumor	6.37591	6.05507			HCC364	NSC	Tumor	6.37591	6.05507
																										HCC827.GR5	NSC	Tumor	5.51948	6.17073			HCC827.GR5	NSC	Tumor	5.51948	6.17073
																										BEN	NSC	Tumor	5.74255	5.59186			BEN	NSC	Tumor	5.74255	5.59186
																										HCC2935	NSC	Tumor	8.05447	5.87061			HCC2935	NSC	Tumor	8.05447	5.87061
																										LCLC.103H	NSC	Tumor	6.21257	5.02059			LCLC.103H	NSC	Tumor	6.21257	5.02059
																										LCLC.97TM1	NSC	Tumor	6.78306	5.84071			LCLC.97TM1	NSC	Tumor	6.78306	5.84071
																										HOP.92	NSC	Tumor	5.6011	4.904			HOP.92	NSC	Tumor	5.6011	4.904
																										NA..7	NSC	Tumor	7.05756	5.53574			NA..7	NSC	Tumor	7.05756	5.53574
																										SUP.T1	ALL	Tumor	6.18408	4.45878			SUP.T1	ALL	Tumor	6.18408	4.45878
																										SUP.B15	ALL	Tumor	6.38215	5.67129			SUP.B15	ALL	Tumor	6.38215	5.67129
																										TALL.1	ALL	Tumor	7.39626	4.67751			TALL.1	ALL	Tumor	7.39626	4.67751
																										RS4.11	ALL	Tumor	5.74147	4.09508			RS4.11	ALL	Tumor	5.74147	4.09508
																										HH	ALL	Tumor	7.10045	5.87995			HH	ALL	Tumor	7.10045	5.87995
																										PEER	ALL	Tumor	7.33753	4.43696			PEER	ALL	Tumor	7.33753	4.43696
																										Loucy	ALL	Tumor	7.53683	5.98277			Loucy	ALL	Tumor	7.53683	5.98277
																										Reh	ALL	Tumor	6.6575	5.71507			Reh	ALL	Tumor	6.6575	5.71507
																										SEM	ALL	Tumor	6.91791	4.8953			SEM	ALL	Tumor	6.91791	4.8953
																										BDCM	ALL	Tumor	6.16189	6.91301			BDCM	ALL	Tumor	6.16189	6.91301
																										MOLT.13	ALL	Tumor	6.75462	5.82604			MOLT.13	ALL	Tumor	6.75462	5.82604
																										ALL.SIL	ALL	Tumor	7.06016	5.5157			ALL.SIL	ALL	Tumor	7.06016	5.5157
																										KASUMI.2	ALL	Tumor	6.91958	5.7666			KASUMI.2	ALL	Tumor	6.91958	5.7666
																										DND.41	ALL	Tumor	7.38759	5.53854			DND.41	ALL	Tumor	7.38759	5.53854
																										NALM.19	ALL	Tumor	7.29186	6.54319			NALM.19	ALL	Tumor	7.29186	6.54319
																										HPB.ALL	ALL	Tumor	7.31089	5.05007			HPB.ALL	ALL	Tumor	7.31089	5.05007
																										NALM.6	ALL	Tumor	6.61029	4.79961			NALM.6	ALL	Tumor	6.61029	4.79961
																										PF.382	ALL	Tumor	7.37226	5.93546			PF.382	ALL	Tumor	7.37226	5.93546
																										MHH.CALL.3	ALL	Tumor	7.49785	7.1374			MHH.CALL.3	ALL	Tumor	7.49785	7.1374
																										KE.37	ALL	Tumor	7.3302	5.71562			KE.37	ALL	Tumor	7.3302	5.71562
																										MHH.CALL.4	ALL	Tumor	6.80038	6.24165			MHH.CALL.4	ALL	Tumor	6.80038	6.24165
																										MUTZ.5	ALL	Tumor	6.56224	6.75087			MUTZ.5	ALL	Tumor	6.56224	6.75087
																										KOPN.8	ALL	Tumor	7.7443	6.19869			KOPN.8	ALL	Tumor	7.7443	6.19869
																										RPMI.8402	ALL	Tumor	5.22882	5.48639			RPMI.8402	ALL	Tumor	5.22882	5.48639
																										P12.ICHIKAWA	ALL	Tumor	6.54566	5.03386			P12.ICHIKAWA	ALL	Tumor	6.54566	5.03386
																										JURKAT	ALL	Tumor	6.96197	5.68846			JURKAT	ALL	Tumor	6.96197	5.68846
																										X697	ALL	Tumor	7.02414	5.32625			X697	ALL	Tumor	7.02414	5.32625
																										MHH.CALL.2	ALL	Tumor	7.08002	6.05268			MHH.CALL.2	ALL	Tumor	7.08002	6.05268
																										MOLT.16	ALL	Tumor	6.96301	4.53294			MOLT.16	ALL	Tumor	6.96301	4.53294
																										RCH.ACV	ALL	Tumor	6.88911	5.95			RCH.ACV	ALL	Tumor	6.88911	5.95
																										MOLT.3	ALL	Tumor	6.64746	4.97728			MOLT.3	ALL	Tumor	6.64746	4.97728
																										NCI.H226	LUSC	Tumor	5.9674	4.19456			NCI.H226	LUSC	Tumor	5.9674	4.19456
																										EBC.1	LUSC	Tumor	6.79364	6.96394			EBC.1	LUSC	Tumor	6.79364	6.96394
																										RERF.LC.AI	LUSC	Tumor	6.56087	2.88947			RERF.LC.AI	LUSC	Tumor	6.56087	2.88947
																										SK.MES.1	LUSC	Tumor	7.07607	5.78031			SK.MES.1	LUSC	Tumor	7.07607	5.78031
																										NCI.H520	LUSC	Tumor	6.56773	7.31913			NCI.H520	LUSC	Tumor	6.56773	7.31913
																										HCC.15	LUSC	Tumor	7.42122	5.25399			HCC.15	LUSC	Tumor	7.42122	5.25399
																										SW.900	LUSC	Tumor	6.96185	5.98618			SW.900	LUSC	Tumor	6.96185	5.98618
																										LUDLU.1	LUSC	Tumor	7.5238	4.05658			LUDLU.1	LUSC	Tumor	7.5238	4.05658
																										HARA	LUSC	Tumor	7.13812	4.42021			HARA	LUSC	Tumor	7.13812	4.42021
																										KNS.62	LUSC	Tumor	5.50494	4.79442			KNS.62	LUSC	Tumor	5.50494	4.79442
																										EPLC.272H	LUSC	Tumor	6.22997	5.26303			EPLC.272H	LUSC	Tumor	6.22997	5.26303
																										HCC.95	LUSC	Tumor	6.60763	5.74066			HCC.95	LUSC	Tumor	6.60763	5.74066
																										LC.1F	LUSC	Tumor	6.79338	6.19731			LC.1F	LUSC	Tumor	6.79338	6.19731
																										LOU.NH91	LUSC	Tumor	6.35032	4.81558			LOU.NH91	LUSC	Tumor	6.35032	4.81558
																										LK.2	LUSC	Tumor	5.57592	6.17632			LK.2	LUSC	Tumor	5.57592	6.17632
																										RERF.LC.Sq1	LUSC	Tumor	7.05745	5.68285			RERF.LC.Sq1	LUSC	Tumor	7.05745	5.68285
																										HLF.a	LUSC	Tumor	6.99095	5.07895			HLF.a	LUSC	Tumor	6.99095	5.07895
																										NCI.H1703	LUSC	Tumor	7.22882	5.11686			NCI.H1703	LUSC	Tumor	7.22882	5.11686
																										Calu.1	LUSC	Tumor	7.12412	4.92267			Calu.1	LUSC	Tumor	7.12412	4.92267
																										NCI.H2170	LUSC	Tumor	6.96636	2.15056			NCI.H2170	LUSC	Tumor	6.96636	2.15056
																										Sq.1	LUSC	Tumor	6.69961	4.51349			Sq.1	LUSC	Tumor	6.69961	4.51349
																										NCI.H1385	LUSC	Tumor	5.51159	4.24031			NCI.H1385	LUSC	Tumor	5.51159	4.24031
																										NCI.H1869	LUSC	Tumor	5.79986	4.73606			NCI.H1869	LUSC	Tumor	5.79986	4.73606
																										SW.1783	LGG	Tumor	7.64378	3.40327			SW.1783	LGG	Tumor	7.64378	3.40327
																										GI.1	LGG	Tumor	6.75342	5.25096			GI.1	LGG	Tumor	6.75342	5.25096
																										KALS.1	LGG	Tumor	7.16531	4.74739			KALS.1	LGG	Tumor	7.16531	4.74739
																										H4	LGG	Tumor	7.21636	5.01881			H4	LGG	Tumor	7.21636	5.01881
																										NMC.G1	LGG	Tumor	8.10324	5.57622			NMC.G1	LGG	Tumor	8.10324	5.57622
																										KNS.42	LGG	Tumor	6.4814	5.51791			KNS.42	LGG	Tumor	6.4814	5.51791
																										Hs.683	LGG	Tumor	7.31805	5.10643			Hs.683	LGG	Tumor	7.31805	5.10643
																										GAMG	LGG	Tumor	6.83403	5.86987			GAMG	LGG	Tumor	6.83403	5.86987
																										LNZ308	LGG	Tumor	6.80491	4.40531			LNZ308	LGG	Tumor	6.80491	4.40531
																										SF539	LGG	Tumor	6.70625	4.44294			SF539	LGG	Tumor	6.70625	4.44294
																										BICR.56	HNSC	Tumor	5.06048	3.96347			BICR.56	HNSC	Tumor	5.06048	3.96347
																										BICR.16	HNSC	Tumor	6.92422	4.78031			BICR.16	HNSC	Tumor	6.92422	4.78031
																										BICR.6	HNSC	Tumor	5.72765	2.08066			BICR.6	HNSC	Tumor	5.72765	2.08066
																										BHY	HNSC	Tumor	6.61559	7.0445			BHY	HNSC	Tumor	6.61559	7.0445
																										SNU.1214	HNSC	Tumor	6.68972	5.73118			SNU.1214	HNSC	Tumor	6.68972	5.73118
																										BICR.22	HNSC	Tumor	5.37469	1.78241			BICR.22	HNSC	Tumor	5.37469	1.78241
																										BICR.18	HNSC	Tumor	6.57243	5.74953			BICR.18	HNSC	Tumor	6.57243	5.74953
																										YD.15	HNSC	Tumor	6.42291	6.1536			YD.15	HNSC	Tumor	6.42291	6.1536
																										YD.10B	HNSC	Tumor	5.732	4.82018			YD.10B	HNSC	Tumor	5.732	4.82018
																										HSC.2	HNSC	Tumor	5.83643	5.12846			HSC.2	HNSC	Tumor	5.83643	5.12846
																										HSC.3	HNSC	Tumor	6.11707	5.03738			HSC.3	HNSC	Tumor	6.11707	5.03738
																										HSC.4	HNSC	Tumor	6.25701	6.73525			HSC.4	HNSC	Tumor	6.25701	6.73525
																										FaDu	HNSC	Tumor	6.61147	3.30597			FaDu	HNSC	Tumor	6.61147	3.30597
																										CAL.27	HNSC	Tumor	5.94743	5.41954			CAL.27	HNSC	Tumor	5.94743	5.41954
																										SCC.9	HNSC	Tumor	5.98823	4.96394			SCC.9	HNSC	Tumor	5.98823	4.96394
																										SCC.4	HNSC	Tumor	7.79559	4.55766			SCC.4	HNSC	Tumor	7.79559	4.55766
																										SNU.1066	HNSC	Tumor	6.3918	5.52669			SNU.1066	HNSC	Tumor	6.3918	5.52669
																										SNU.1041	HNSC	Tumor	6.89821	6.18269			SNU.1041	HNSC	Tumor	6.89821	6.18269
																										BICR.31	HNSC	Tumor	6.26716	6.15239			BICR.31	HNSC	Tumor	6.26716	6.15239
																										PE.CA.PJ15	HNSC	Tumor	6.01257	4.57592			PE.CA.PJ15	HNSC	Tumor	6.01257	4.57592
																										PE.CA.PJ49	HNSC	Tumor	6.57016	5.20711			PE.CA.PJ49	HNSC	Tumor	6.57016	5.20711
																										PE.CA.PJ34..clone.C12.	HNSC	Tumor	6.79377	4.64386			PE.CA.PJ34..clone.C12.	HNSC	Tumor	6.79377	4.64386
																										PE.CA.PJ41..clone.D2.	HNSC	Tumor	4.95	5.615			PE.CA.PJ41..clone.D2.	HNSC	Tumor	4.95	5.615
																										A.253	HNSC	Tumor	6.58782	5.00809			A.253	HNSC	Tumor	6.58782	5.00809
																										CAL.33	HNSC	Tumor	6.78477	5.61824			CAL.33	HNSC	Tumor	6.78477	5.61824
																										SNU.1076	HNSC	Tumor	6.47054	4.0917			SNU.1076	HNSC	Tumor	6.47054	4.0917
																										YD.38	HNSC	Tumor	6.04549	5.97522			YD.38	HNSC	Tumor	6.04549	5.97522
																										SNU.46	HNSC	Tumor	7.17483	5.25927			SNU.46	HNSC	Tumor	7.17483	5.25927
																										YD.8	HNSC	Tumor	7.61883	5.35438			YD.8	HNSC	Tumor	7.61883	5.35438
																										SNU.899	HNSC	Tumor	6.53993	5.25965			SNU.899	HNSC	Tumor	6.53993	5.25965
																										Detroit.562	HNSC	Tumor	6.62746	4.46532			Detroit.562	HNSC	Tumor	6.62746	4.46532
																										SCC.25	HNSC	Tumor	6.23477	4.17552			SCC.25	HNSC	Tumor	6.23477	4.17552
																										SCC.15	HNSC	Tumor	5.80787	4.17712			SCC.15	HNSC	Tumor	5.80787	4.17712
																										FTC.238	THCA	Tumor	6.52888	5.05137			FTC.238	THCA	Tumor	6.52888	5.05137
																										FTC.133	THCA	Tumor	7.90575	2.69153			FTC.133	THCA	Tumor	7.90575	2.69153
																										SW579	THCA	Tumor	7.46712	5.63227			SW579	THCA	Tumor	7.46712	5.63227
																										TT	THCA	Tumor	6.06996	6.9431			TT	THCA	Tumor	6.06996	6.9431
																										X8305C	THCA	Tumor	7.78463	5.8775			X8305C	THCA	Tumor	7.78463	5.8775
																										X8505C	THCA	Tumor	7.324	5.04745			X8505C	THCA	Tumor	7.324	5.04745
																										CAL.62	THCA	Tumor	6.9305	5.39163			CAL.62	THCA	Tumor	6.9305	5.39163
																										BHT.101	THCA	Tumor	5.7447	5.00045			BHT.101	THCA	Tumor	5.7447	5.00045
																										B.CPAP	THCA	Tumor	6.65893	4.86592			B.CPAP	THCA	Tumor	6.65893	4.86592
																										TT2609.C02	THCA	Tumor	6.8835	5.20633			TT2609.C02	THCA	Tumor	6.8835	5.20633
																										ML.1	THCA	Tumor	6.52262	3.35614			ML.1	THCA	Tumor	6.52262	3.35614
																										NCO2	LCML	Tumor	5.49442	4.47249			NCO2	LCML	Tumor	5.49442	4.47249
																										MEG.01	LCML	Tumor	6.47541	4.55949			MEG.01	LCML	Tumor	6.47541	4.55949
																										K.562	LCML	Tumor	6.13319	2.1635			K.562	LCML	Tumor	6.13319	2.1635
																										KYO.1	LCML	Tumor	6.02481	4.25776			KYO.1	LCML	Tumor	6.02481	4.25776
																										MOLM.6	LCML	Tumor	5.4489	6.09318			MOLM.6	LCML	Tumor	5.4489	6.09318
																										LAMA.84	LCML	Tumor	5.93428	4.48414			LAMA.84	LCML	Tumor	5.93428	4.48414
																										CML.T1	LCML	Tumor	6.89603	3.99729			CML.T1	LCML	Tumor	6.89603	3.99729
																										BV.173	LCML	Tumor	6.67666	6.13545			BV.173	LCML	Tumor	6.67666	6.13545
																										NALM.1	LCML	Tumor	6.85873	6.4348			NALM.1	LCML	Tumor	6.85873	6.4348
																										JURL.MK1	LCML	Tumor	7.00045	3.75916			JURL.MK1	LCML	Tumor	7.00045	3.75916
																										JK.1	LCML	Tumor	5.71177	3.83289			JK.1	LCML	Tumor	5.71177	3.83289
																										KU812	LCML	Tumor	6.6792	4.82629			KU812	LCML	Tumor	6.6792	4.82629
																										KCL.22	LCML	Tumor	6.64674	5.91337			KCL.22	LCML	Tumor	6.64674	5.91337
																										EM.2	LCML	Tumor	5.45648	5.67779			EM.2	LCML	Tumor	5.45648	5.67779
																										D283.Med	MB	Tumor	5.65277	5.0009			D283.Med	MB	Tumor	5.65277	5.0009
																										Daoy	MB	Tumor	6.8586	4.63401			Daoy	MB	Tumor	6.8586	4.63401
																										D341.Med	MB	Tumor	5.30305	5.08108			D341.Med	MB	Tumor	5.30305	5.08108
																										ONS.76	MB	Tumor	6.34643	6.11291			ONS.76	MB	Tumor	6.34643	6.11291
																										NCI.H660	PRAD	Tumor	6.8813	5.28503			NCI.H660	PRAD	Tumor	6.8813	5.28503
																										VCaP	PRAD	Tumor	6.54828	4.98641			VCaP	PRAD	Tumor	6.54828	4.98641
																										MDA.PCa.2b	PRAD	Tumor	7.66406	1.85997			MDA.PCa.2b	PRAD	Tumor	7.66406	1.85997
																										DU.145	PRAD	Tumor	6.85848	5.92267			DU.145	PRAD	Tumor	6.85848	5.92267
																										LNCaP.clone.FGC	PRAD	Tumor	7.26303	2.96347			LNCaP.clone.FGC	PRAD	Tumor	7.26303	2.96347
																										X22Rv1	PRAD	Tumor	6.94837	4.34483			X22Rv1	PRAD	Tumor	6.94837	4.34483
																										PC.3	PRAD	Tumor	6.50239	3.16027			PC.3	PRAD	Tumor	6.50239	3.16027
																										PrEC.LH	PRAD	Tumor	5.9607	5.04658			PrEC.LH	PRAD	Tumor	5.9607	5.04658
																										EWS502	Ewings_sarcoma	Tumor	6.16952	5.49346			EWS502	Ewings_sarcoma	Tumor	6.16952	5.49346
																										EW8	Ewings_sarcoma	Tumor	5.76447	4.90977			EW8	Ewings_sarcoma	Tumor	5.76447	4.90977
																										NA..8	Ewings_sarcoma	Tumor	5.1206	4.48736			NA..8	Ewings_sarcoma	Tumor	5.1206	4.48736
																										SF767	CESC	Tumor	5.97934	5.57773			SF767	CESC	Tumor	5.97934	5.57773
																										NA..9	CESC	Tumor	7.1645	4.88166			NA..9	CESC	Tumor	7.1645	4.88166
																										NA..10	CESC	Tumor	5.55582	4.11437			NA..10	CESC	Tumor	5.55582	4.11437
																										EHEB	CLL	Tumor	6.12329	7.32903			EHEB	CLL	Tumor	6.12329	7.32903
																										JVM.3	CLL	Tumor	5.83744	6.08852			JVM.3	CLL	Tumor	5.83744	6.08852
																										JVM.2	CLL	Tumor	6.25058	7.55005			JVM.2	CLL	Tumor	6.25058	7.55005
																										MEC.1	CLL	Tumor	6.4363	5.20516			MEC.1	CLL	Tumor	6.4363	5.20516
